# Supplementary material for: Using BpyAla to generate copper artificial metalloenzymes: a catalytic and structural study
Source: Royal Society of Chemistry journal article supplement (doi:10.1039/d3cy01648j), 2024-01-01
Supplement: d3cy01648j2.pdf [file d3cy01648j2.pdf]

## Supporting Information B

### Using BpyAla to generate Copper Artificial Metalloenzymes: a catalytic and structural study

E. Klemencic<sup>1</sup>, R. C. Brewster<sup>1</sup>, H. S. Ali<sup>1,2</sup>, J. M. Richardson<sup>3</sup>, A. G. Jarvis<sup>1\*</sup>

<sup>1</sup>School of Chemistry, Joseph Black Building, Kings Buildings, University of Edinburgh, David Brewster Road, Edinburgh, EH9 3FJ. <sup>2</sup> Current address: Chemistry Research

Laboratory, Department of Chemistry and the INEOS Oxford Institute for Antimicrobial Research, University of Oxford, 12 Mansfield Road, Oxford OX1 3TA, UK. <sup>3</sup> School of

Biological Sciences, Swann Building, University of Edinburgh, Edinburgh, EH9 3BF.

\*Corresponding author: amanda.jarvis@ed.ac.uk

## 1. Computational Studies.

### 1.1 System Set-up

The X-ray structures of Cu(II)-bound SCP-Q111CBpy and SCP-Q111BpyAla were considered as host proteins. Missing hydrogen atoms were added using Chimera<sup>1</sup> at pH 7.4 while the crystallographic water molecules bound to Cu(II) were manually removed. The molecular structures of compound **3** (5-methoxy-1H-indole) and compound **4** (1-(1-methyl-1H-imidazol-2-yl)but-2-en-1-one) were considered as substrates and saved in the PDB file using Avogadro.<sup>2</sup> The molecular docking of the substrates to each protein was carried out using AutoDock Vina and evaluated according to the lowest binding scores. The mutation study of different amino acids was constructed using the Dunbrack backbone-dependent rotamer library<sup>4,5</sup> within Chimera.<sup>1</sup>

### 1.2 Molecular Dynamics Simulation.

To prepare the system for initial Molecular Dynamics (MD) simulations the X-ray crystal structures of SCP\_Q111CBpy and SCP\_Q111BpyAla with Cu(II) ion and Triton-X-100 were considered (apo state) (PDB IDs 8AF3 and 8AF2 respectively). In another set of MD simulations the lowest Vina docking score poses of the substrate **3** and substrate **4** bound to SCP\_Q111CBpy and SCP\_Q111BpyAla were used. MD simulations were prepared using xleap available in AMBER Tools 18.<sup>6</sup> The force field parameters for the unnatural amino acids cystine bipyridine and bipyridine alanine were generated using RESP charge fitting<sup>7</sup> in Antechamber<sup>8</sup>, while for other amino acids the ff14SB<sup>9</sup> force field parameters were used. The parameters for square planar copper ion (Cu (II)) either with water, as in case of apo state, or with substrate, were generated using AMBER's Metal Center Parameter Builder (MCPB).<sup>10</sup> To generate charges, the ChgModB method was used at the UB3LYP/6-311G\* level of theory, using the MCPB.py v3.0 script.<sup>10</sup> Further force field parameters were generated using the RESP<sup>7</sup> and Seminario method.<sup>11</sup> Furthermore, for both substrates the second generation General Amber Force Field (GAFF2)<sup>12</sup> with AM1-BCC charges, generated using the Antechamber<sup>8</sup> and Parmchk2 within AMBER 18 were used. Finally, the protein and substrate complexes were solvated in a cubic box of TIP3P<sup>13</sup> water molecules which were further neutralized by adding Na<sup>+</sup> ions, whose parameters were taken from the Joung and Cheatham.<sup>14</sup>

All MD simulation were carried out by the Particle Mesh Ewald Molecular Dynamics (PMEMD) module of AMBER 18. The systems were initially minimized using 2000 steps of steepest decent minimization with 2.0 kcal mol<sup>-1</sup> as a restraints potential on heavy atoms of protein. After that these were heated for 100 ps from 0 to 298.15 K temperature using the NVT ensemble and a Langevin thermostat<sup>15</sup> with collision frequency of 5 ps<sup>-1</sup>, while the equilibration of the system was done at 1 ns using the NPT simulation with pressure coupling using the Berendsen barostat<sup>16</sup> while gradually removing the restraining. Furthermore, 200 ns NPT MD simulations have been carried out using 2 fs time step, SHAKE protocol on hydrogen atoms and 10 Å non-bonded cut-off with periodic boundary conditions. In total four 200 ns MD simulations as a triplicate were performed: the SCP\_Q111CBpy and SCP\_Q111BpyAla apo enzyme, the substrate bound complex of SCP\_Q111CBpy and the substrate bound complex of SCP\_Q111BpyAla. The data was stored every 1 ps and visualized with CPPTRAJ and PYTRAJ in AMBER<sup>17</sup>, Chimera<sup>1</sup> and VMD.<sup>18</sup>

### 1.3 DFT Cluster Models.

Cluster models focused on the substrate binding environment including the second coordination sphere and considered all atoms in the quantum mechanical approach.<sup>19-20</sup> Three cluster models (**A**, **B** and **C**) were created based on the final equilibrated structure from 200 ns MD simulations as shown in Figure S16. We truncated the active site models by considering the amino acid residues which are in close proximity of the substrate and determine the substrate binding and positioning, particularly all polar hydrogen containing amino acids which are close to metal and substrate. Model **A** (the minimal cluster model) consisted of 2,2-bipyridine attached to Cu(II) and substrates (**3** and **4**), and had 58 atoms in total. Thereafter, large cluster models **B** and **C** were created that contains the environment around the copper and substrates, and all the hydrogen binding around them. Thus, the model **B** consist of one short chains amino acids, L<sub>87</sub>-D<sub>88</sub> around the substrates and a polar amino acid K<sub>91</sub> and some other amino acids including G<sub>85</sub>, Q<sub>107</sub> and M<sub>112</sub> attached to BpyAla<sub>111</sub>. Furthermore, five water molecules and both substrates **3** and **4** were included in the active site model **B**. While the model **C** which were created from the MD equilibrated structural coordinates of SCP\_Q111CBpy. Thus, the. Model **C** consist of amino acids including the Q<sub>90</sub>, S<sub>107</sub>, Q<sub>108</sub> and two short chains of amino acids F<sub>93</sub>-F<sub>94</sub> and I<sub>104</sub>-M<sub>105</sub> which surrounds the substrates. Furthermore, an unnatural amino acid CBpy<sub>111</sub> and both substrates (**3** and **4**) were the part of this active site model. Overall, the model **B** and **C** consists of 180 and 183 atoms respectively and a charge of +2. The extract of both these models (**A**, **B** and **C**) are shown in Figure S1.

All the quantum mechanical calculations discussed in this work were carried out using Gaussian-09 software package.<sup>21</sup> Following our previous experience with cluster models of reactions catalyzed by metalloenzymes,<sup>22,23</sup> we applied unrestricted B3LYP hybrid functional of density functional theory (DFT) in combination with 6-31G\* on all atoms except copper atom and for copper LANL2DZ (with effective core potential) basis sets:BS1.<sup>24-26</sup> To find out the local minima the geometry optimizations and the frequency calculations at 298.15 K temperature and 1 atm pressure were carried out using BS1 level of DFT method, and were confirmed by visualizing the all positive eigenvalues in frequency calculations. While all the transitions state structures were searched with Berny algorithm,<sup>27</sup> and were confirmed by visualizing and animating the single negative eigenvalues of frequency calculations. In order to correct the energetics and consider solvent effect, single point energy calculations were performed using the higher level of basis set: BS2: UB3LYP-D3/6-311+G\*/LACV3P+ (with effective core potential) on copper. Furthermore, these single point energy calculations also have continuum polarized conductor implicit solvent model (CPCM) with dielectric constant ( $\epsilon = 5.7$ ) mimicking chlorobenzene<sup>27</sup> and Grimme dispersion correction (D3).<sup>28</sup> All the energy values and structural coordinates are in the electronic supplementary information.

## 2. Results and discussions

To gain further insight into the novel ArMs, triplicates of 200 ns molecular dynamics (MD) simulation for the SCP\_Q111CBpy and SCP\_Q111BpyAla were carried out. The structural effects of these ArMs were probed using root means square deviation (RMSD), root mean square fluctuation (RMSF) and radius of gyration. RMSD is frequently used to confirm the stability and convergence of the computer-generated models while the RMSF is commonly used to study the thermal fluctuations of amino acids/atoms during MD simulation of enzyme structures. The RMSD profiles for all the alpha carbon ( $C_\alpha$ ) atoms for SCP\_Q111CBpy and SCP\_Q111BpyAla in their apo forms (without substrates) are shown in Figure S2 and Figure S3, respectively. To study whether the structures of both these ArMs converged and remained stable during the course of MD simulation, we analyzed the RMSD and RMSF in the apo state and with substrates bound (Figures S2-S7). The apo and substrate-bound forms of both enzymes converged well and remained stable during 200 ns MD simulations with minimal overall deviations (Figure S2-S5). However, to some extent the SCP\_Q111CBpy structure is more flexible than SCP\_Q111BpyAla in the substrate-bound form. Figures S6 and S7 indicate

that the thermal fluctuations of amino acids in both enzymes in both apo and substrate-bound form are similar. However, in the substrate-bound form of SCP\_Q111CBpy residues-wise fluctuations are slightly higher, particularly in a small loop of amino acids Val<sub>79</sub>-Leu<sub>80</sub>-Gly<sub>81</sub>-Lys<sub>82</sub> in the center of tunnel. The radius of gyration (RG), which relates to the compactness of the SCP\_Q111CBpy and SCP\_Q111BpyAla structures, was analysed during the course of MD simulations (Figures S8 and S9, respectively). The results revealed that both crystal structures were stable and remained compact during the simulation. The average RG for the SCP\_Q111CBpy structure (13.9 Å) is slightly higher than that of SCP\_Q111BpyAla (13.5 Å), indicating that SCP\_Q111CBpy structure is less compact. Overall, all MD simulation parameters (RMSD, RMSF and RG) show that the cysteine-linked bipyridine ArM structure (SCP\_Q111CBpy) is more flexible than the alanine-linked bipyridine (SCP\_Q111BpyAla).

### 3. Catalysis

We explored the Friedel-Craft alkylation reaction of 1*H*-indole **3** with 1-(1-methyl-1*H*-imidazol-2-yl)but-2-en-1-one **4** to give the 3-(1*H*-indol-3-yl)-1-(1-methyl-1*H*-imidazol-2-yl)butan-1-one product **5** as a benchmark reaction catalyzed by Cu(II). We started computational modeling to gain insight into the enantioselective nature of Friedel-Craft (FC) alkylation using the density functional theory (DFT) method. We created three models (**A**, **B** and **C**) for DFT calculations. In model **A** the reaction is catalyzed by Cu(II)-2,2'-bipyridine, and can be divided into two steps typically found in FC alkylation<sup>30,31</sup> (Scheme S1). The first step is the conjugate addition of indole **3** to enone **4** to form intermediate (**Int1**) via transition state (**TS1**) and the second step is the product formation by the protonation reaction via second transition state (**TS2**). The first step is an enantioselective step which leads to two isomer intermediates: **Int1**<sub>proS,A</sub> and **Int1**<sub>proR,A</sub> via the **TS1**<sub>proS,A</sub> and **TS1**<sub>proR,A</sub> transition states. The reaction energy barrier to obtain **Int1**<sub>proS,A</sub> is 7.3 kcal mol<sup>-1</sup>, while for **Int1**<sub>proR,A</sub> it is 7.6 kcal mol<sup>-1</sup>. The second step is the transfer of a proton from the conjugated carbon of enone **4** to carbonyl oxygen of **4** leading to the enol product via the **TS2**<sub>enol</sub> or beta carbon of **4** via the **TS2**<sub>keto</sub>, leading to the keto product. The formation of enol products from both intermediate enantiomers is highly unlikely because of the very high energy barriers of 28.5 kcal mol<sup>-1</sup> and 29.0 kcal mol<sup>-1</sup> for **TS2**<sub>enol,proS,A</sub> and **TS2**<sub>enol,proR,A</sub> respectively. By contrast, there is a lower energy barrier for the formation of the keto products **Prod**<sub>keto,ProS,A</sub> and **Prod**<sub>keto,ProR,A</sub>: 5.9 kcal mol<sup>-1</sup> and 6.5 kcal mol<sup>-1</sup>, respectively. The complete reaction free-energy profile calculated with unrestricted B3LYP-D3/BS2 level of DFT method is presented in Figure S11 and the

optimized geometric structures of transition states and intermediates with the key distances are presented in Figure S12-S15. Overall, our computational analysis shows that the conjugate coupling step is the rate determining step as well as the enantioselective step and the formation of keto product is most likely. This agrees well with our experimental results as well as previous studies<sup>31</sup> so we decided to focus on the first step only for the rest of our work. To enhance the enantioselectivity we catalyzed the FC reaction with newly synthesized artificial metalloenzymes and presented in Table 1.

#### 4. References:

1. Pettersen, E. F.; Goddard, T. D.; Huang, C. C.; Couch, G. S.; Greenblatt, D. M.; Meng, E. C.; Ferrin, T. E., UCSF Chimera—A visualization system for exploratory research and analysis. *Journal of Computational Chemistry* **2004**, *25*, 1605-1612.
2. Hanwell, M. D.; Curtis, D. E.; Lonie, D. C.; Vandermeersch, T.; Zurek, E.; Hutchison, G. R., Avogadro: an advanced semantic chemical editor, visualization, and analysis platform. *Journal of Cheminformatics* **2012**, *4*, 17.
3. Trott, O.; Olson, A. J., AutoDock Vina: improving the speed and accuracy of docking with a new scoring function, efficient optimization, and multithreading. *Journal of computational chemistry* **2010**, *31*, 455-461.
4. Dunbrack, R. L.; Karplus, M., Backbone-dependent Rotamer Library for Proteins Application to Side-chain Prediction. *Journal of Molecular Biology* **1993**, *230*, 543-574.
5. Dunbrack, R. L., Rotamer Libraries in the 21st Century. *Current Opinion in Structural Biology* **2002**, *12*, 431-440.
6. D.A. Case, I.Y. Ben-Shalom, S.R. Brozell, D.S. Cerutti, T.E. Cheatham, III, V.W.D. Cruzeiro, T.A. Darden, R.E. Duke, D. Ghoreishi, M.K. Gilson, H. Gohlke, A.W. Goetz, D. Greene, R Harris, N. Homeyer, Y. Huang, S. Izadi, A. Kovalenko, T. Kurtzman, T.S. Lee, S. LeGrand, P. Li, C. Lin, J. Liu, T. Luchko, R. Luo, D.J. Mermelstein, K.M. Merz, Y. Miao, G. Monard, C. Nguyen, H. Nguyen, I. Omelyan, A. Onufriev, F. Pan, R. Qi, D.R. Roe, A. Roitberg, C. Sagui, S. Schott-Verdugo, J. Shen, C.L. Simmerling, J. Smith, R. Salomon- Ferrer, J. Swails, R.C. Walker, J. Wang, H. Wei, R.M. Wolf, X. Wu, L. Xiao, D.M. York and P.A. Kollman (2018), AMBER 2018, University of California, San Francisco.
7. Bayly, C. I.; Cieplak, P.; Cornell, W.; Kollman, P. A., A well-behaved electrostatic potential based method using charge restraints for deriving atomic charges: the RESP model. *The Journal of Physical Chemistry* **1993**, *97*, 10269-10280.
8. Wang, J.; Wang, W.; Kollman, P. A.; Case, D. A., Automatic atom type and bond type perception in molecular mechanical calculations. *Journal of Molecular Graphics and Modelling* **2006**, *25*, 247-260.
9. Maier, J. A.; Martinez, C.; Kasavajhala, K.; Wickstrom, L.; Hauser, K. E.; Simmerling, C., ffl4SB: Improving the Accuracy of Protein Side Chain and

- Backbone Parameters from ff99SB. *Journal of Chemical Theory and Computation* **2015**, *11*, 3696-3713.
10. Li, P.; Merz, K. M., MCPB.py: A Python Based Metal Center Parameter Builder. *Journal of Chemical Information and Modeling* **2016**, *56*, 599-604.
  11. Seminario, J. M., Calculation of intramolecular force fields from second-derivative tensors. *International Journal of Quantum Chemistry* **1996**, *60*, 1271-1277.
  12. Träg, J.; Zahn, D., Improved GAFF2 parameters for fluorinated alkanes and mixed hydro- and fluorocarbons. *Journal of Molecular Modeling* **2019**, *25*, 39.
  13. Jorgensen, W. L.; Chandrasekhar, J.; Madura, J. D.; Impey, R. W.; Klein, M. L., Comparison of simple potential functions for simulating liquid water. *The Journal of Chemical Physics* **1983**, *79*, 926-935.
  14. Joung, I. S.; Cheatham, T. E., Determination of Alkali and Halide Monovalent Ion Parameters for Use in Explicitly Solvated Biomolecular Simulations. *The Journal of Physical Chemistry B* **2008**, *112*, 9020-9041.
  15. Loncharich, R. J.; Brooks, B. R.; Pastor, R. W., Langevin dynamics of peptides: the frictional dependence of isomerization rates of N-acetylalanyl-N'-methylamide. *Biopolymers* **1992**, *32*, 523-35.
  16. Lin, Y.; Pan, D.; Li, J.; Zhang, L.; Shao, X., Application of Berendsen barostat in dissipative particle dynamics for nonequilibrium dynamic simulation. *The Journal of Chemical Physics* **2017**, *146*, 124108.
  17. Roe, D. R.; Cheatham, T. E., PTRAJ and CPPTRAJ: Software for Processing and Analysis of Molecular Dynamics Trajectory Data. *Journal of Chemical Theory and Computation* **2013**, *9*, 3084-3095.
  18. Humphrey, W.; Dalke, A.; Schulten, K., VMD: Visual molecular dynamics. *Journal of Molecular Graphics* **1996**, *14*, 33-38.
  19. Blomberg, M. R. A.; Borowski, T.; Himo, F.; Liao, R.-Z.; Siegbahn, P. E. M., Quantum Chemical Studies of Mechanisms for Metalloenzymes. *Chemical Reviews* **2014**, *114*, 3601-3658.
  20. de Visser, S. P., Mechanistic Insight on the Activity and Substrate Selectivity of Nonheme Iron Dioxygenases. *Chem Rec* **2018**, *18*, 1501-1516.
  21. Gaussian-09, Revision D.01, Frisch, M. J.; Trucks, G. W.; Schlegel, H. B.; Scuseria, G. E.; Robb, M. A.; Cheeseman, J. R.; Scalmani, G.; Barone, V.; Mennucci, B.; Petersson, G. A.; Nakatsuji, H.; Caricato, M.; Li, X.; Hratchian, H. P.; Izmaylov, A. F.; Bloino, J.; Zheng, G.; Sonnenberg, J. L.; Hada, M.; Ehara, M.; Toyota, K.; Fukuda, R.; Hasegawa, J.; Ishida, M.; Nakajima, T.; Honda, Y.; Kitao, O.; Nakai, H.; Vreven, T.; Montgomery Jr, J. A.; Peralta, J. E.; Ogliaro, F.; Bearpark, M.; Heyd, J. J.; Brothers, E.; Kudin, K. N.; Staroverov, V. N.; Keith, T.; Kobayashi, R.; Normand, J.; Raghavachari, K.; Rendell, A.; Burant, J. C.; Iyengar, S. S.; Tomasi, J.; Cossi, M.; Rega, N.; Millam, J. M.; Klene, M.; Knox, J. E.; Cross, J. B.; Bakken, V.; Adamo, C.; Jaramillo, J.; Gomperts, R.; Stratmann, R. E.; Yazyev, O.; Austin, A. J.; Cammi, R.; Pomelli, C.; Ochterski, J. W.; Martin, R. L.; Morokuma, K.; Zakrzewski, V. G.; Voth, G. A.; Salvador, P.; Dannenberg, J. J.; Dapprich, S.; Daniels, A. D.; Farkas, O.; Foresman, J. B.; Ortiz, J. V.; Cioslowski, J.; Fox, D. J. Gaussian, Inc., Wallingford CT, 2013.

22. Louka, S.; Barry, S. M.; Heyes, D. J.; Mubarak, M. Q. E.; Ali, H. S.; Alkhalaf, L. M.; Munro, A. W.; Scrutton, N. S.; Challis, G. L.; de Visser, S. P., Catalytic Mechanism of Aromatic Nitration by Cytochrome P450 TxtE: Involvement of a Ferric-Peroxynitrite Intermediate. *Journal of the American Chemical Society* **2020**, *142*, 15764-15779.
23. Ali, H. S.; Henchman, R. H.; de Visser, S. P., Lignin Biodegradation by a Cytochrome P450 Enzyme: A Computational Study into Syringol Activation by GcoA. *Chemistry – A European Journal* **2020**, *26*, 13093-13102.
24. Becke, A. D., Density-functional thermochemistry. III. The role of exact exchange. *The Journal of Chemical Physics* **1993**, *98*, 5648-5652.
25. Hay, P. J.; Wadt, W. R., Ab initio effective core potentials for molecular calculations. Potentials for the transition metal atoms Sc to Hg. *The Journal of Chemical Physics* **1985**, *82*, 270-283.
26. Hehre, W. J.; Ditchfield, R.; Pople, J. A., Self—Consistent Molecular Orbital Methods. XII. Further Extensions of Gaussian—Type Basis Sets for Use in Molecular Orbital Studies of Organic Molecules. *The Journal of Chemical Physics* **1972**, *56*, 2257-2261.
27. Peng, C.; Bernhard Schlegel, H., Combining Synchronous Transit and Quasi-Newton Methods to Find Transition States. *Israel Journal of Chemistry* **1993**, *33*, 449-454.
28. Cossi, M.; Scalmani, G.; Rega, N.; Barone, V., New developments in the polarizable continuum model for quantum mechanical and classical calculations on molecules in solution. *The Journal of Chemical Physics* **2002**, *117*, 43-54.
29. Grimme, S.; Antony, J.; Ehrlich, S.; Krieg, H., A consistent and accurate ab initio parametrization of density functional dispersion correction (DFT-D) for the 94 elements H-Pu. *The Journal of Chemical Physics* **2010**, *132*, 154104.
30. Wu, H.; Zhao, T.; Hu, X., Friedel-Crafts Reaction of N,N-Dimethylaniline with Alkenes Catalyzed by Cyclic Diaminocarbene-Gold(I) Complex. *Scientific Reports* **2018**, *8* (1), 11449.
31. Villarino, L.; Chordia, S.; Alonso-Cotchico, L.; Reddem, E.; Zhou, Z.; Thunnissen, A. M. W. H.; Maréchal, J.-D.; Roelfes, G., Cofactor Binding Dynamics Influence the Catalytic Activity and Selectivity of an Artificial Metalloenzyme. *ACS Catalysis* **2020**, *10* (20), 11783-11790.



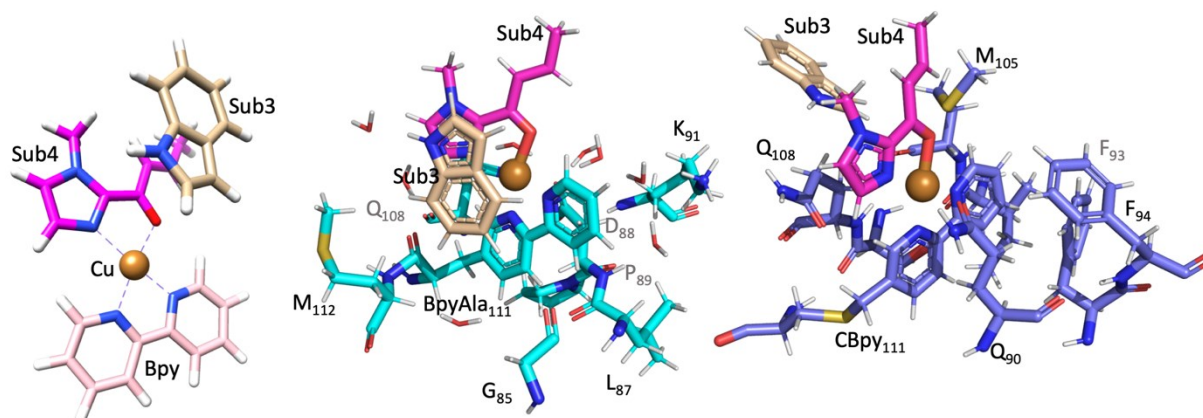

**Figure S1.** The active-site models bound to substrate 3 and substrate 4. The large cluster models had 180 (model B) and 183 (model C) atoms in total, including Cu(II), substrates (3 and 4) and the first and second coordination sphere amino acids, representing the protein environment.

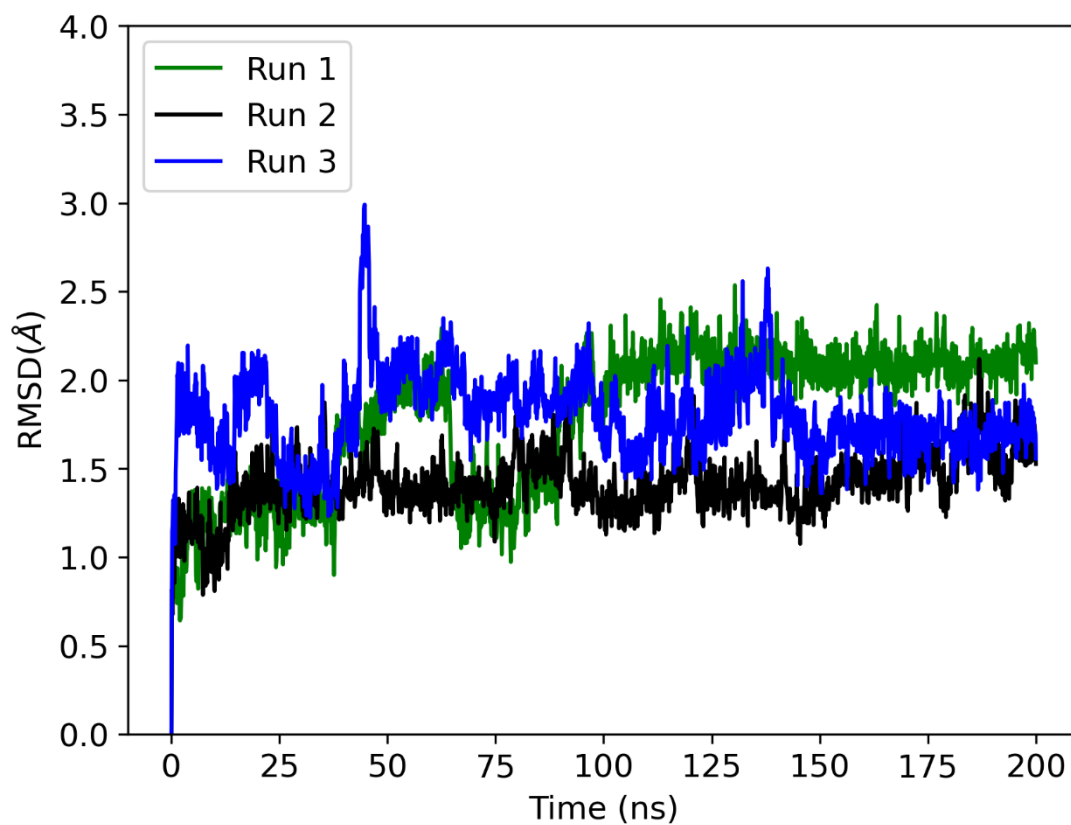

**Figure S2:** RMSD of C-alpha atoms for three individual MD trajectories and for an average trajectory for the 200 ns simulation for SCP-Q111CBpy.

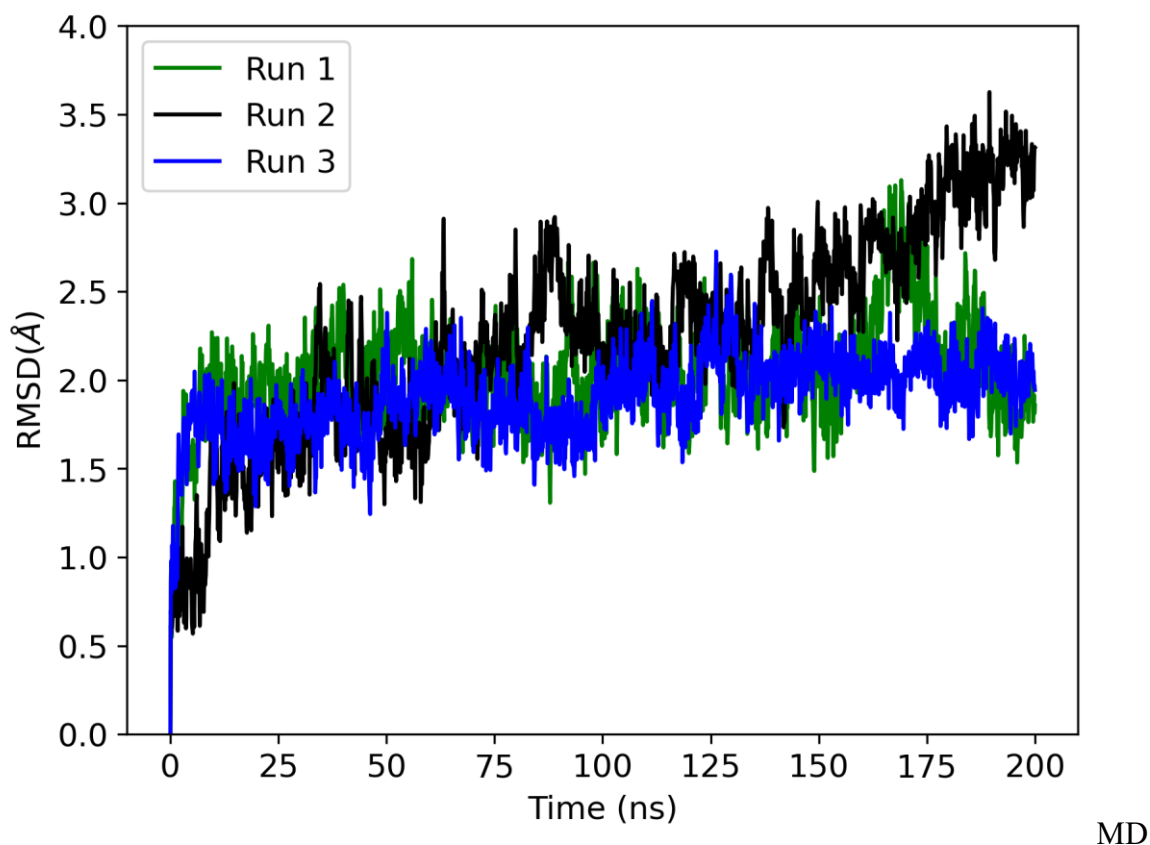

**Figure S3:** RMSD of C-alpha atoms for four individual MD trajectories and for an average trajectory for the 200 ns MD simulation for SCP-Q111Bpyala.

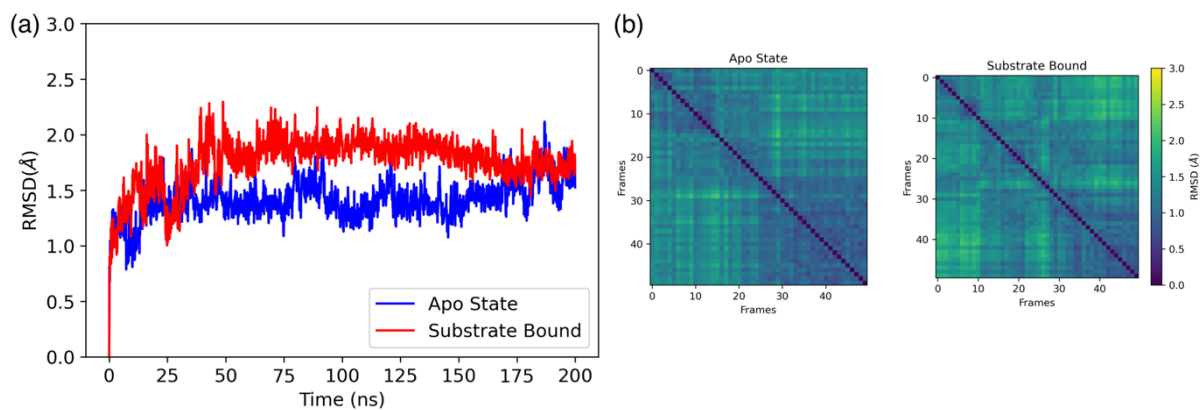

**Figure S4:** Convergence analysis used in this study to assess the stability/flexibility of the SCP-Q111CBpy for 200 ns of the MD trajectories: (a) Backbone RMSD (b) all frame to frame RMSD.

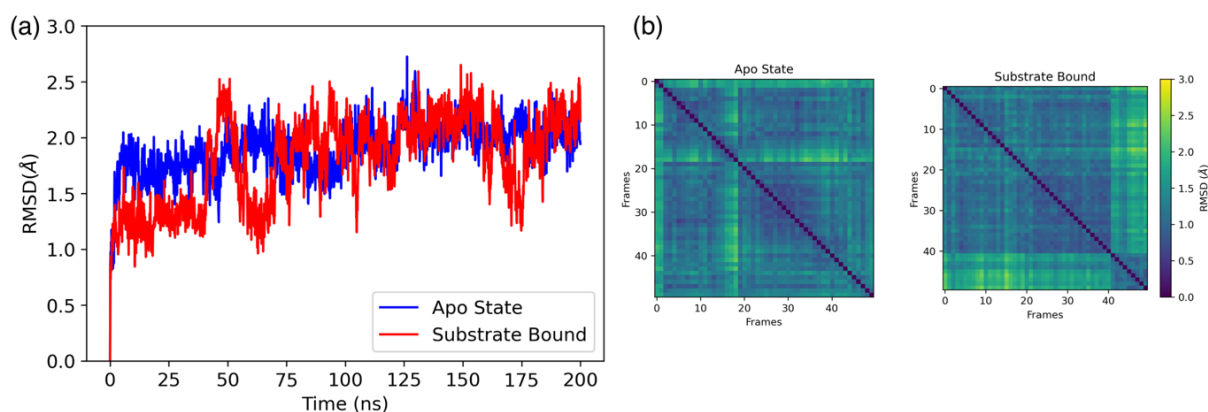

**Figure S5:** Convergence analysis used in this study to assess the stability/flexibility of the SCP-Q11BpyAla for 200 ns of the MD trajectories: (a) Backbone RMSD (b) all frame to frame RMSD.

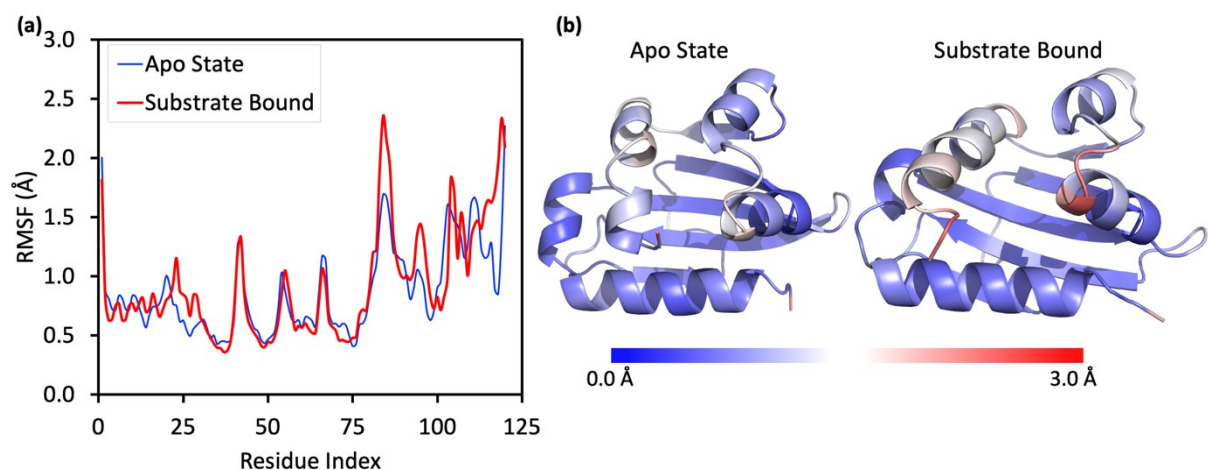

**Figure S6:** Convergence analysis used in this study to assess the stability/flexibility of the SCP-Q11CBpy for 200 ns of the MD trajectories: (a) RMSF and (b) RMSF for Apo State (left) and Substrate Bound (right) structures.

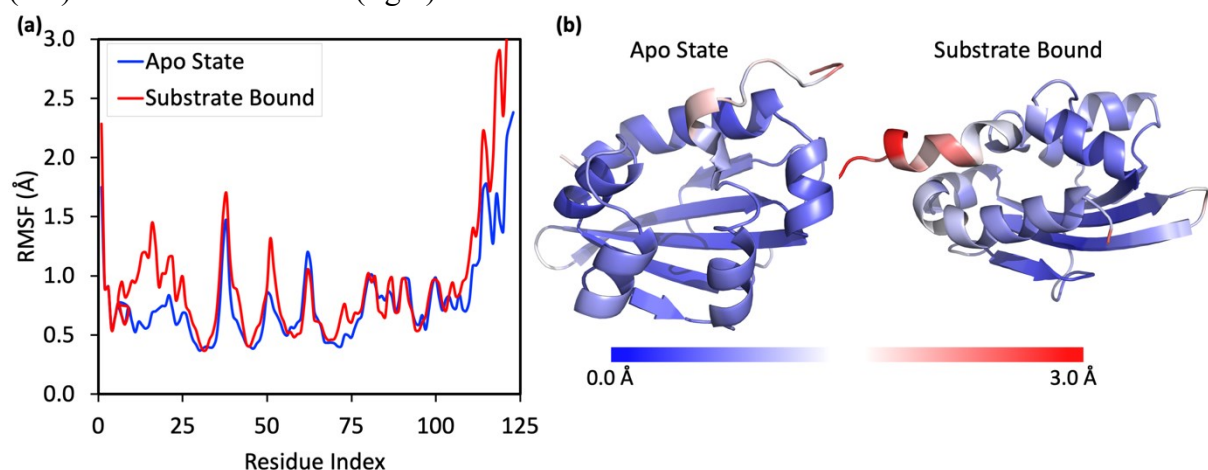

**Figure S7:** Convergence analysis used in this study to assess the stability/flexibility of the SCP-Q11BpyAla for 200 ns of the MD trajectories: (a) RMSF and (b) RMSF for Apo State (left) and Substrate Bound (right) structures.

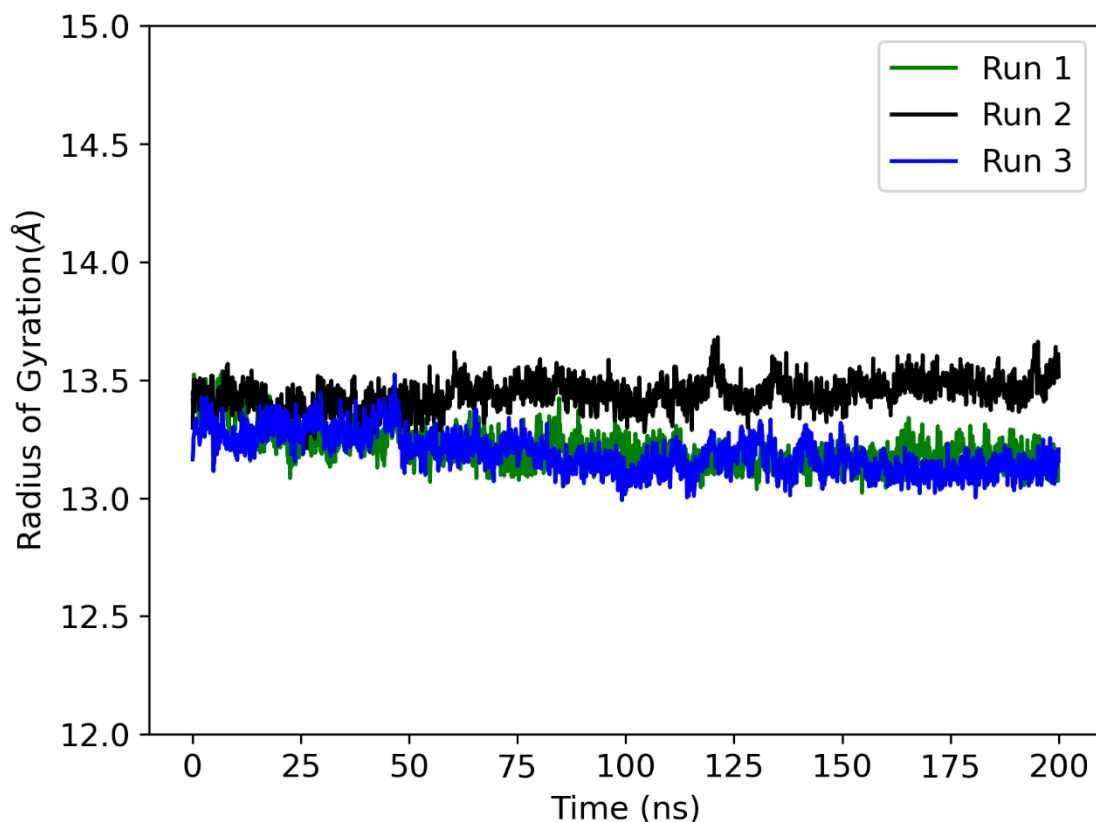

**Figure S8:** Radius of gyration for four individual MD trajectories and for an average trajectory for the 200 ns MD for SCP-Q111CBpy.

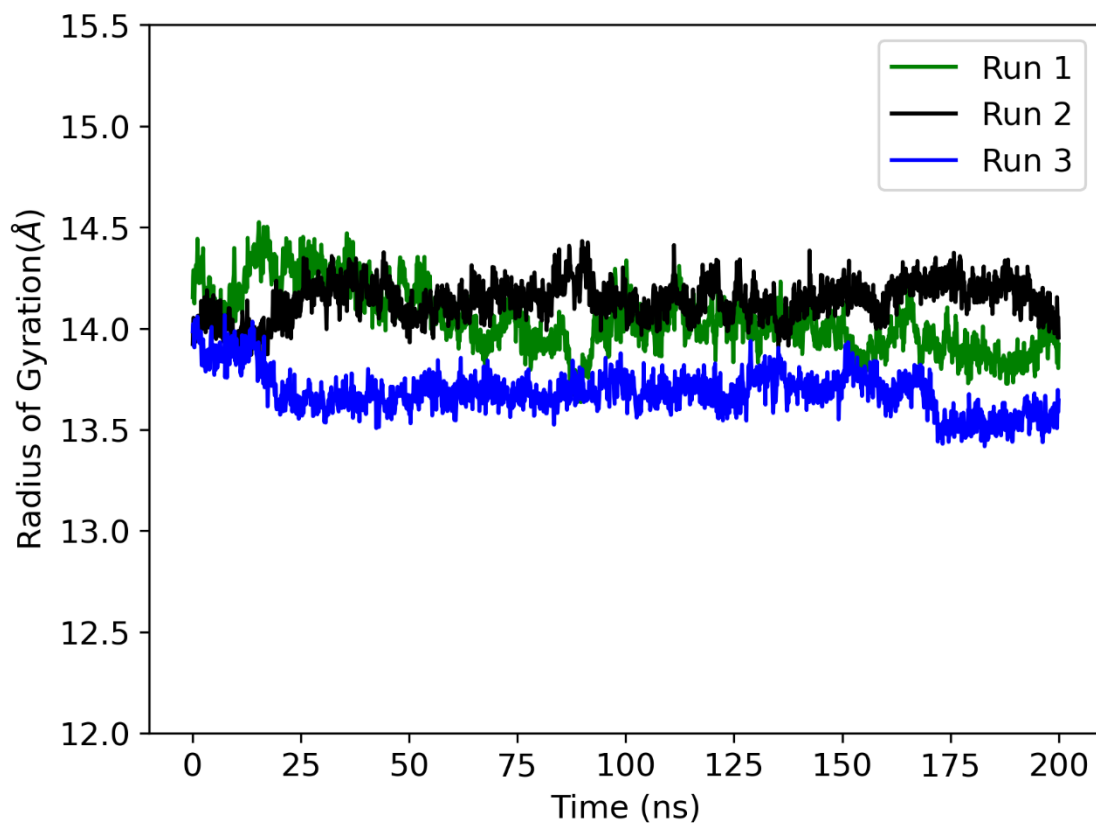

**Figure S9:** Radius of gyration for four individual MD trajectories and for an average trajectory for the 200 ns MD for SCP-Q111BpyAla.

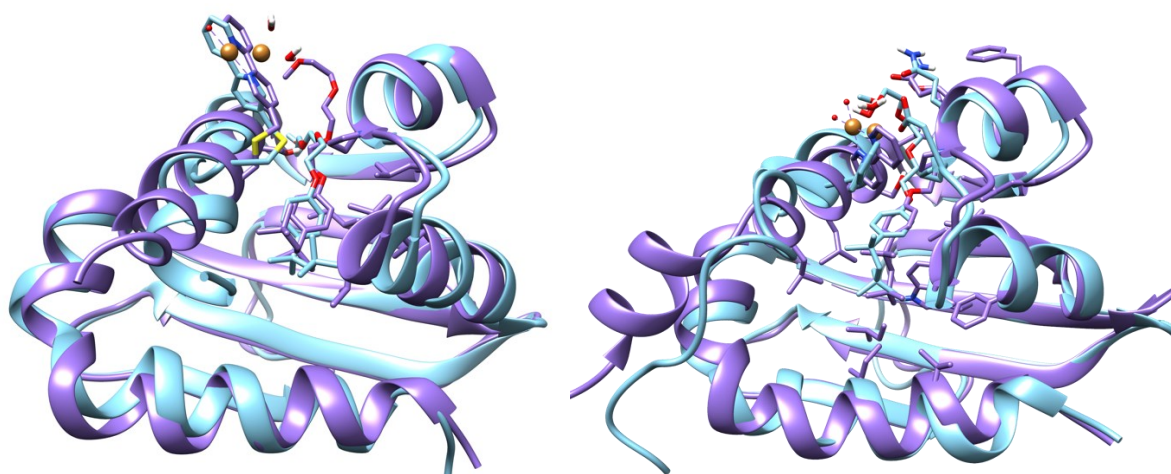

**Figure S10:** Overlay of X-ray crystal (in purple) and 200 ns MD equilibrated (in light blue) for SCP-Q111CBpy (left) and SCP-Q111BpyAla (right).

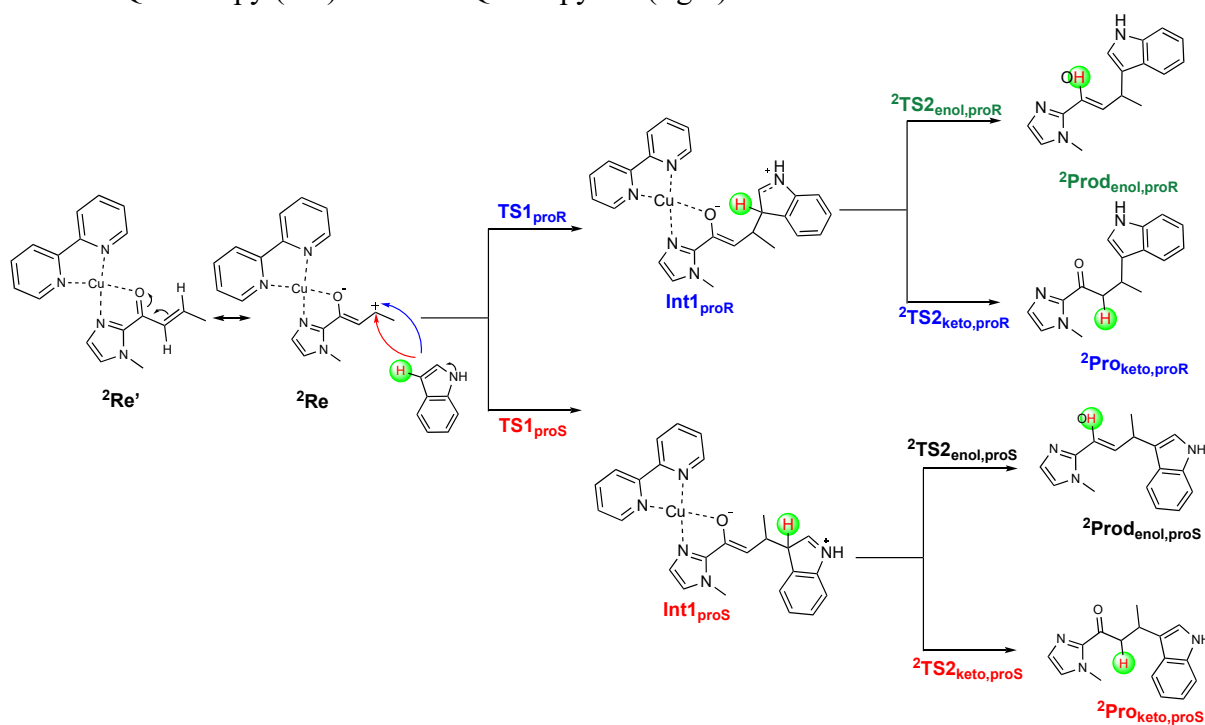

**Scheme S1:** Friedel-Crafts alkylation Reaction mechanisms by the Cu-ArM as studied in this work.

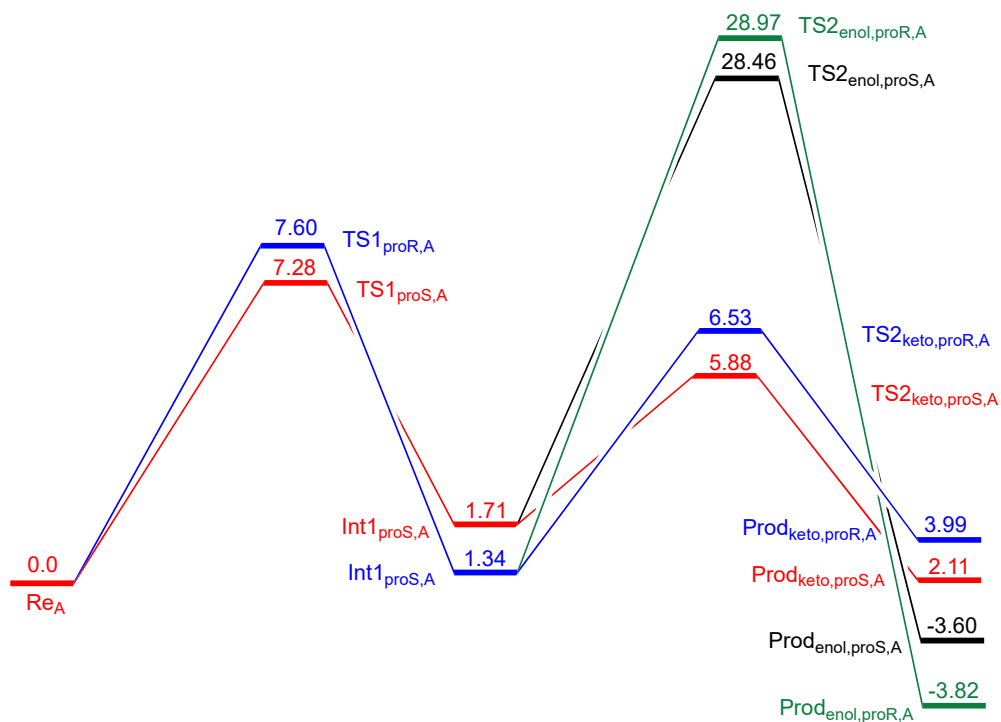

**Figure S11:** Potential energy landscape for the Friedel-Crafts alkylation in Gas phase at UB3LYP-D3/6-31G\* level of Density Functional Theory (DFT). Energy values are in kcal/mol.

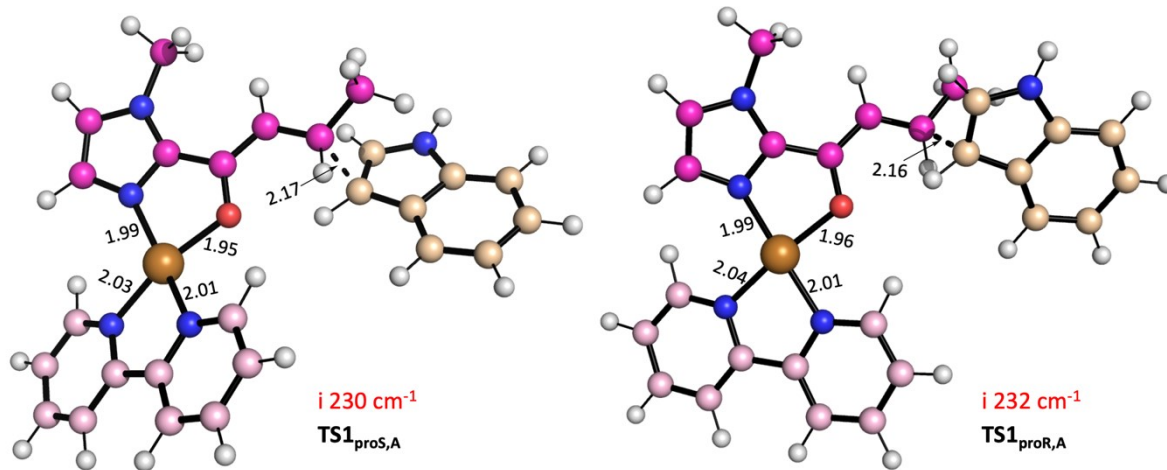

**Figure S12:** UB3LYP/BS1 optimized geometries of TS1<sub>proS,A</sub> (left side) and TS1<sub>proR,A</sub> (right side) structures as obtained in Gaussian 09. Bond lengths are in angstroms and the imaginary frequencies are in cm<sup>-1</sup>.



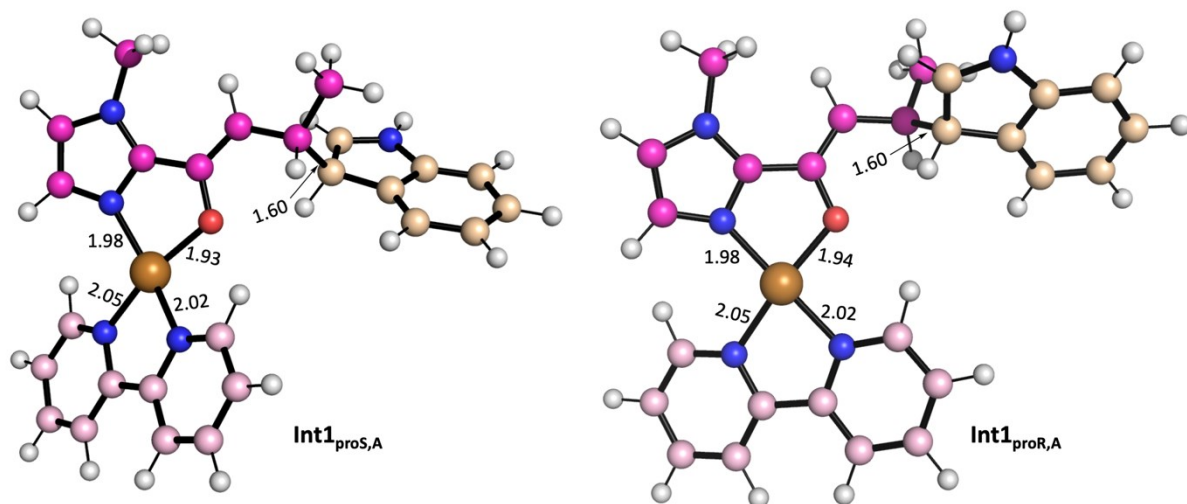

**Figure S13:** UB3LYP/BS1 optimized geometries of Int1<sub>proS,A</sub> (left side) and Int1<sub>proR,A</sub> (right side) structures as obtained in Gaussian 09. Bond lengths are in Angstroms.

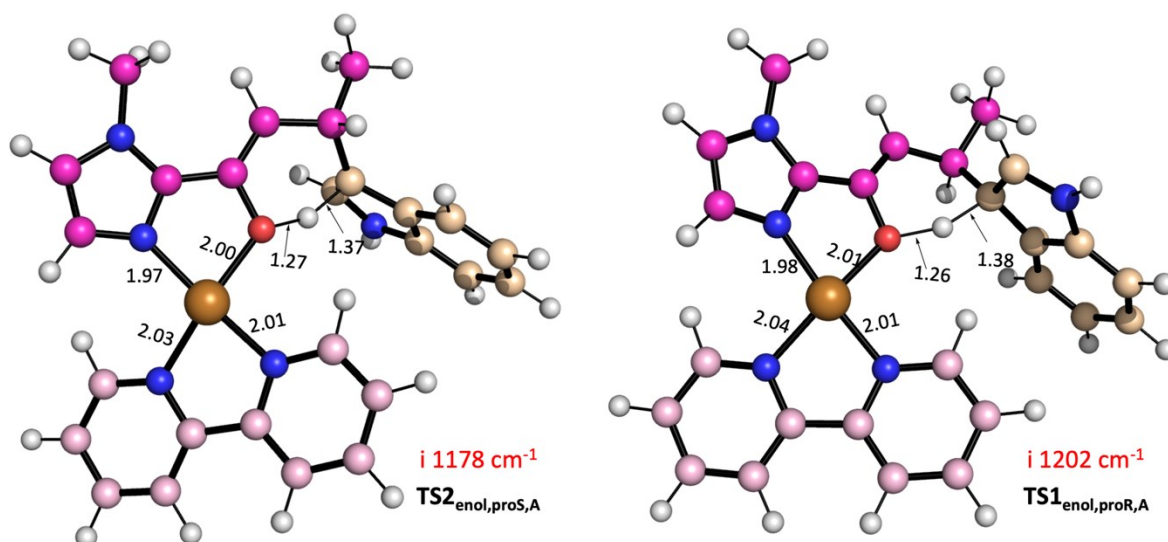

**Figure S14:** UB3LYP/BS1 optimized geometries of TS2<sub>enol,proS,A</sub> (left side) and TS1<sub>enol,proR,A</sub> (right side) structures as obtained in Gaussian 09. Bond lengths are in angstroms and the imaginary frequencies are in  $\text{cm}^{-1}$ .

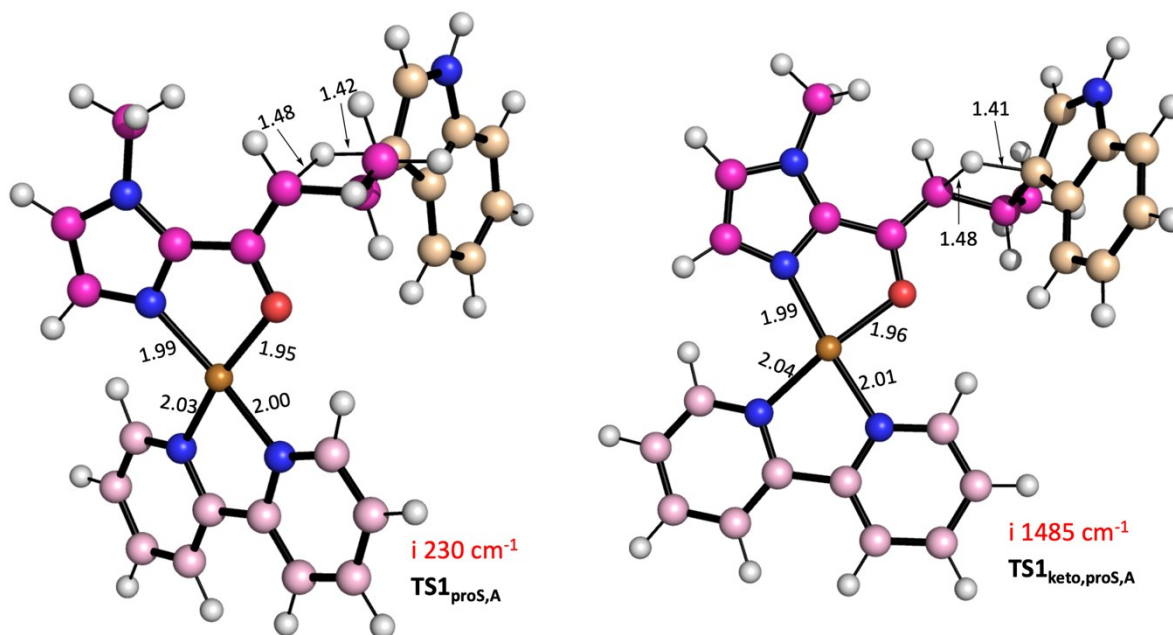

**Figure S15:** UB3LYP/BS1 optimized geometries of  $TS2_{keto,proS,A}$  (left side) and  $TS2_{keto,proR,A}$  (right side) structures as obtained in Gaussian 09. Bond lengths are in angstroms and the imaginary frequencies are in  $cm^{-1}$ .

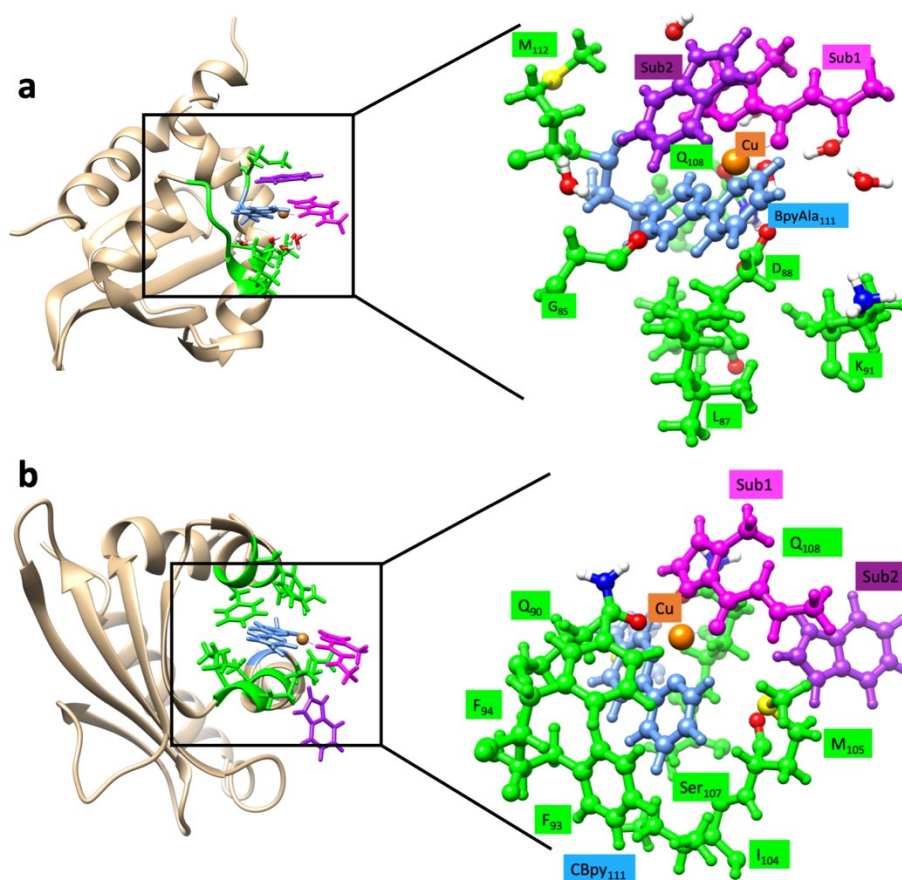

**Figure S16:** Extract from the MD equilibrated structure of SCP\_Q111BpyAla complex (a) and SCP\_Q111CBpy complex (b) with key active-site residues highlighted.



**Table S1:** Absolute (free) energies of the optimized geometries for the Friedel-Crafts alkylation by the Cu-Bpy model <sup>2</sup>Re<sub>A</sub> calculates at the UB3LYP-D3/BS1//BS2 level of theory.

|                             | EBS1<br>(a.u.) | EBS2<br>(a.u.) | EZPE<br>(a.u.) | EG<br>(a.u.) | $\Delta E_{\text{total}} + \text{ZPE}$<br>kcal mol <sup>-1</sup> |
|-----------------------------|----------------|----------------|----------------|--------------|------------------------------------------------------------------|
| Re <sub>A</sub>             | -1550.50833    | -1551.05324    | 0.46760        | 0.40218      | 0.00                                                             |
| TS1 <sub>proS,A</sub>       | -1550.49919    | -1551.04190    | 0.46787        | 0.40450      | 7.28                                                             |
| TS1 <sub>proR,A</sub>       | -1550.49776    | -1551.04145    | 0.46793        | 0.40465      | 7.60                                                             |
| Int1 <sub>proS,A</sub>      | -1550.51143    | -1551.05332    | 0.46981        | 0.40699      | 1.34                                                             |
| Int1 <sub>proR,A</sub>      | -1550.50958    | -1551.05283    | 0.46991        | 0.40677      | 1.71                                                             |
| TS2 <sub>keto,proS,A</sub>  | -1550.49299    | -1551.04134    | 0.46507        | 0.40399      | 5.88                                                             |
| TS2 <sub>keto,proR,A</sub>  | -1550.49025    | -1551.04009    | 0.46486        | 0.40336      | 6.53                                                             |
| TS2 <sub>enol,proS,A</sub>  | -1550.46388    | -1551.00471    | 0.46442        | 0.40205      | 28.46                                                            |
| TS2 <sub>enol,proR,A</sub>  | -1550.46246    | -1551.00393    | 0.46446        | 0.40180      | 28.97                                                            |
| Prod <sub>keto,proS,A</sub> | -1550.50119    | -1551.05078    | 0.46851        | 0.40436      | 2.11                                                             |
| Prod <sub>keto,proR,A</sub> | -1550.50210    | -1551.04708    | 0.46780        | 0.40072      | 3.99                                                             |
| Prod <sub>enol,proS,A</sub> | -1550.52695    | -1551.05946    | 0.46808        | 0.40065      | -3.60                                                            |
| Prod <sub>enol,proR,A</sub> | -1550.52696    | -1551.05972    | 0.46799        | 0.40014      | -3.82                                                            |

**Table S2:** Absolute (free) energies of the optimized geometries for the Friedel-Crafts alkylation by the SCP-Q111BpyAla model <sup>2</sup>Re<sub>B</sub> calculates at the UB3LYP-D3/BS1//BS2 level of theory.

|                        | EBS1<br>(a.u.) | EBS2<br>(a.u.) | EZPE<br>(a.u.) | EG<br>(a.u.) | $\Delta E_{\text{total}} + \text{ZPE}$<br>kcal mol <sup>-1</sup> |
|------------------------|----------------|----------------|----------------|--------------|------------------------------------------------------------------|
| Re <sub>proS,B</sub>   | -4440.32483    | -4441.80462    | 1.50491        | 1.34108      | 0.00                                                             |
| Re <sub>proR,B</sub>   | -4440.31584    | -4441.79328    | 1.50210        | 1.34095      | 5.35                                                             |
| TS1 <sub>proS,B</sub>  | -4440.31810    | -4441.78926    | 1.50560        | 1.34948      | 10.07                                                            |
| TS1 <sub>proR,B</sub>  | -4440.29815    | -4441.77774    | 1.50278        | 1.34375      | 15.53                                                            |
| Int1 <sub>proS,B</sub> | -4440.33133    | -4441.80384    | 1.50675        | 1.34948      | 1.65                                                             |
| Int1 <sub>proR,B</sub> | -4440.30786    | -4441.79052    | 1.50343        | 1.34176      | 7.92                                                             |

**Table S3:** Absolute (free) energies of the optimized geometries for the Friedel-Crafts alkylation by the SCP-Q111CBpy model <sup>2</sup>Re<sub>C</sub> calculates at the UB3LYP-D3/BS1//BS2 level of theory.

|                        | EBS1<br>(a.u.) | EBS2<br>(a.u.) | EZPE<br>(a.u.) | EG<br>(a.u.) | $\Delta E_{\text{total}} + \text{ZPE}$<br>kcal mol <sup>-1</sup> |
|------------------------|----------------|----------------|----------------|--------------|------------------------------------------------------------------|
| Re <sub>proS,C</sub>   | -4843.43190    | -4844.87956    | 1.54161        | 1.37942      | 5.64                                                             |
| Re <sub>proR,C</sub>   | -4843.44096    | -4844.88643    | 1.53950        | 1.37691      | 0.00                                                             |
| TS1 <sub>proS,C</sub>  | -4843.42329    | -4844.86498    | 1.54262        | 1.37729      | 15.42                                                            |
| TS1 <sub>proR,C</sub>  | -4843.42341    | -4844.86779    | 1.54254        | 1.37457      | 13.61                                                            |
| Int1 <sub>proS,C</sub> | -4843.42564    | -4844.87442    | 1.54317        | 1.37394      | 9.85                                                             |
| Int1 <sub>proR,C</sub> | -4843.43357    | -4844.88063    | 1.54431        | 1.37872      | 6.66                                                             |

## Cartesian Coordinates.

### Model A structures:

#### <sup>2</sup>Re<sub>A</sub>

|    |             |             |             |
|----|-------------|-------------|-------------|
| H  | -4.06274500 | -3.62111800 | 2.92099700  |
| H  | -2.09985600 | -2.30750100 | 2.18198400  |
| C  | -4.17523600 | -2.86269800 | 2.15258300  |
| C  | -1.49945800 | 1.32353800  | -1.32330100 |
| C  | -3.06948500 | -2.12181800 | 1.73605400  |
| C  | -3.22963900 | -1.14994400 | 0.74445000  |
| C  | -5.50696600 | -1.63138900 | 0.59369900  |
| C  | -5.41829300 | -2.62059900 | 1.57021400  |
| C  | -2.11293700 | -0.33118700 | 0.20411000  |
| C  | -0.78479000 | -0.46824000 | 0.61689200  |
| C  | 0.20055800  | 0.32473700  | 0.03089900  |
| C  | -0.15831700 | 1.23539200  | -0.96111100 |
| N  | -4.44522700 | -0.91607100 | 0.19620400  |
| N  | -2.45012100 | 0.56789900  | -0.75315100 |
| H  | -1.82289900 | 2.01157300  | -2.09704500 |
| H  | -6.45010800 | -1.40464400 | 0.10613400  |
| H  | -6.30008400 | -3.18153900 | 1.86002700  |
| H  | -0.51333600 | -1.18585200 | 1.38137700  |
| H  | 1.23516500  | 0.22411100  | 0.34388300  |
| Cu | -4.43261700 | 0.63291800  | -1.19520200 |
| O  | -4.37212900 | 1.39840800  | -3.19110500 |
| N  | -6.33490700 | 1.29967500  | -1.42824400 |
| C  | -5.47707200 | 1.80216400  | -3.63401000 |
| C  | -5.63765400 | 2.26866000  | -5.00046000 |
| C  | -4.59095200 | 2.31365500  | -5.85775000 |
| C  | -4.65947200 | 2.75830700  | -7.27517900 |
| H  | -3.96357200 | 3.59103300  | -7.44627900 |
| H  | -6.62025500 | 2.57076600  | -5.34088900 |
| H  | -5.66382800 | 3.06707000  | -7.57573600 |
| H  | -4.32478800 | 1.94742500  | -7.93729800 |
| H  | -3.61947400 | 2.00186900  | -5.47965800 |
| C  | -6.59363800 | 1.76145000  | -2.66606600 |
| N  | -7.90927700 | 2.13646700  | -2.74802000 |
| C  | -8.47399500 | 1.90381400  | -1.52390400 |
| C  | -7.48763600 | 1.37841300  | -0.71432900 |
| H  | -7.55256300 | 1.08305700  | 0.32254300  |
| H  | -9.51243800 | 2.12582600  | -1.32635800 |
| C  | -8.65724100 | 2.69148300  | -3.88633600 |
| H  | -8.22014200 | 3.64160100  | -4.20029000 |
| H  | -8.66770400 | 1.98218800  | -4.71653000 |
| H  | -9.68324000 | 2.86597200  | -3.56254300 |
| C  | 3.98954500  | 4.11848800  | -3.70341400 |
| C  | 4.45736600  | 2.87473300  | -4.15930900 |
| C  | 3.57722300  | 1.89058800  | -4.63784300 |
| C  | 2.20273100  | 2.11557000  | -4.67585000 |
| C  | 1.70063200  | 3.35490100  | -4.22047400 |
| C  | 2.61752400  | 4.33420700  | -3.74359500 |
| H  | 4.68005400  | 4.87495300  | -3.34294800 |
| H  | 5.52436600  | 2.67663100  | -4.14534300 |
| H  | 3.97747200  | 0.94569900  | -4.99093700 |
| H  | 1.52964500  | 1.35400200  | -5.05942600 |
| N  | 1.86882400  | 5.45011600  | -3.37972800 |
| H  | 2.24952300  | 6.31905000  | -3.02933600 |
| C  | 0.55003500  | 5.21404300  | -3.61578300 |
| C  | 0.39564300  | 3.92690000  | -4.12645900 |
| H  | -0.53839900 | 3.47907800  | -4.44125600 |
| H  | -0.19361700 | 5.97238100  | -3.41391800 |
| H  | 0.57591100  | 1.86359900  | -1.45347500 |

#### <sup>2</sup>TS1<sub>ProS,A</sub>

|    |             |             |             |
|----|-------------|-------------|-------------|
| H  | -5.75359700 | -3.36315700 | 3.48207800  |
| H  | -3.35691600 | -2.90661900 | 3.04036000  |
| C  | -5.46571900 | -2.71886800 | 2.65724700  |
| C  | -1.02219900 | -0.21869900 | -0.60715700 |
| C  | -4.11722500 | -2.45860900 | 2.41183200  |
| C  | -3.76310500 | -1.62890300 | 1.34675400  |
| C  | -6.01203700 | -1.33003500 | 0.78622900  |
| C  | -6.43280300 | -2.15235600 | 1.82772800  |
| C  | -2.36667300 | -1.31177200 | 0.96754700  |
| C  | -1.23895800 | -1.73440900 | 1.67238600  |
| C  | 0.02770200  | -1.37693200 | 1.20765900  |
| C  | 0.14251900  | -0.60906500 | 0.04937000  |
| N  | -4.71560800 | -1.06790600 | 0.55903100  |
| N  | -2.23650500 | -0.56195700 | -0.15400200 |
| H  | -1.00993600 | 0.37987700  | -1.51127100 |
| H  | -6.72253800 | -0.87358100 | 0.10601500  |
| H  | -7.49011100 | -2.34109200 | 1.97745200  |
| H  | -1.33696300 | -2.32753700 | 2.57376700  |
| H  | 0.91309400  | -1.69554400 | 1.74893700  |
| Cu | -3.96635100 | 0.08778000  | -0.93885600 |
| O  | -3.18675900 | 0.71116200  | -2.61896200 |
| N  | -5.47198400 | 1.26280400  | -1.50091400 |
| C  | -3.91549300 | 1.54395300  | -3.31706400 |
| C  | -3.51821300 | 2.02819900  | -4.55520400 |
| C  | -2.24647400 | 1.73775100  | -5.11877000 |
| C  | -1.70834500 | 2.59616900  | -6.22764100 |
| H  | -1.28284000 | 3.50536400  | -5.77971200 |
| H  | -4.20403700 | 2.63828500  | -5.12990400 |
| H  | -2.48674700 | 2.90855900  | -6.93014500 |
| H  | -0.90012100 | 2.10577500  | -6.77577800 |
| H  | -1.50286900 | 1.35913900  | -4.42311000 |
| C  | -5.18706000 | 1.88763000  | -2.65744100 |
| N  | -6.17503000 | 2.78210200  | -2.94325500 |
| C  | -7.10463900 | 2.70838700  | -1.93001300 |
| C  | -6.65794300 | 1.76597800  | -1.03887000 |
| H  | -7.10672700 | 1.45282800  | -0.10869800 |
| H  | -7.98704200 | 3.33077500  | -1.92381400 |
| C  | -6.27414100 | 3.71087200  | -4.07442300 |
| H  | -5.36723800 | 4.31500600  | -4.14321700 |
| H  | -6.43515400 | 3.16305300  | -5.00618800 |
| H  | -7.12545000 | 4.36913800  | -3.90072200 |
| C  | 0.20554500  | -0.77085400 | -8.48641100 |
| C  | 1.35588500  | -1.14022800 | -7.79119800 |
| C  | 1.35343000  | -1.26754100 | -6.39041800 |
| C  | 0.20325200  | -1.02248600 | -5.64223800 |
| C  | -0.96653700 | -0.64828000 | -6.31513200 |
| C  | -0.93639700 | -0.53686500 | -7.72370900 |
| H  | 0.20427300  | -0.68041300 | -9.56826800 |
| H  | 2.26854900  | -1.33931900 | -8.34341600 |
| H  | 2.26655800  | -1.56830000 | -5.88653700 |
| H  | 0.21350100  | -1.13488900 | -4.56167800 |
| N  | -2.23337700 | -0.18364600 | -8.13383900 |
| H  | -2.51157000 | -0.02804700 | -9.09567100 |
| C  | -3.04892500 | -0.08454100 | -7.07410200 |
| C  | -2.31374700 | -0.29152700 | -5.88291900 |
| H  | -2.76590500 | -0.61940200 | -4.95612400 |
| H  | -4.09527800 | 0.16074000  | -7.19627000 |
| H  | 1.11065300  | -0.31181700 | -0.33820500 |

**<sup>2</sup>TS1<sub>ProR,A</sub>**

|    |             |             |             |
|----|-------------|-------------|-------------|
| H  | -5.22277200 | -3.86008300 | 2.97245200  |
| H  | -2.96700100 | -2.84539900 | 2.80331500  |
| C  | -5.03203200 | -3.07606500 | 2.24641300  |
| C  | -1.04805700 | 0.67119300  | -0.34493700 |
| C  | -3.76400300 | -2.50180100 | 2.15485600  |
| C  | -3.53418700 | -1.49627000 | 1.21464600  |
| C  | -5.74750800 | -1.62932200 | 0.47912200  |
| C  | -6.04178200 | -2.64093600 | 1.38930000  |
| C  | -2.22045200 | -0.84947400 | 0.99321900  |
| C  | -1.07236600 | -1.11177500 | 1.74205800  |
| C  | 0.11451400  | -0.45105400 | 1.42246700  |
| C  | 0.13191500  | 0.45341300  | 0.36142700  |
| N  | -4.53235200 | -1.06455400 | 0.40233200  |
| N  | -2.18707600 | 0.03856100  | -0.03016900 |
| H  | -1.10931200 | 1.35672200  | -1.18239900 |
| H  | -6.49380600 | -1.26441900 | -0.21738000 |
| H  | -7.03608300 | -3.07279900 | 1.41776900  |
| H  | -1.09517800 | -1.81554300 | 2.56539600  |
| H  | 1.01391100  | -0.64392200 | 1.99881300  |
| Cu | -3.96030000 | 0.39747100  | -0.89989800 |
| O  | -3.22105100 | 1.39192600  | -2.41570400 |
| N  | -5.66131700 | 1.20860500  | -1.53479000 |
| C  | -4.09638100 | 1.96690700  | -3.19907500 |
| C  | -3.75780500 | 2.52624600  | -4.42314800 |
| C  | -2.45549000 | 2.41481300  | -4.98126800 |
| C  | -2.26538900 | 2.60320100  | -6.45967600 |
| H  | -1.22006200 | 2.77984000  | -6.72355700 |
| H  | -4.51912800 | 3.03091900  | -5.00471700 |
| H  | -2.88416500 | 3.41142200  | -6.86100900 |
| H  | -2.56860900 | 1.67409400  | -6.96262000 |
| H  | -1.81581600 | 1.66618900  | -4.52228000 |
| C  | -5.46693800 | 1.92328000  | -2.65726800 |
| N  | -6.64709400 | 2.48464300  | -3.04456300 |
| C  | -7.60293700 | 2.11315800  | -2.12516600 |
| C  | -6.98131400 | 1.32411600  | -1.19161100 |
| H  | -7.40040900 | 0.86889500  | -0.30752400 |
| H  | -8.62740100 | 2.44413400  | -2.20757200 |
| C  | -6.92206700 | 3.34190300  | -4.20230800 |
| H  | -6.26437400 | 4.21345200  | -4.19020400 |
| H  | -6.79032100 | 2.78125800  | -5.13096300 |
| H  | -7.95604800 | 3.68075900  | -4.13702100 |
| C  | 1.69713200  | 4.65244600  | -6.13717600 |
| C  | 2.62841400  | 3.65685700  | -5.84586300 |
| C  | 2.35298700  | 2.65446000  | -4.89822000 |
| C  | 1.13826900  | 2.61664500  | -4.21610600 |
| C  | 0.18597900  | 3.60703600  | -4.48566200 |
| C  | 0.49084100  | 4.60236400  | -5.44138700 |
| H  | 1.90972400  | 5.42808700  | -6.86659800 |
| H  | 3.58444600  | 3.65789200  | -6.35937400 |
| H  | 3.10509700  | 1.89835900  | -4.69639300 |
| H  | 0.94094500  | 1.83448200  | -3.48806400 |
| N  | -0.61813800 | 5.46255600  | -5.50521600 |
| H  | -0.68720900 | 6.26954700  | -6.11411900 |
| C  | -1.56891800 | 5.06556200  | -4.64745000 |
| C  | -1.17279300 | 3.86276100  | -4.01572300 |
| H  | -1.55866100 | 3.55502300  | -3.05307500 |
| H  | -2.49087700 | 5.62091600  | -4.53995200 |
| H  | 1.03691500  | 0.98311400  | 0.08578300  |

**<sup>2</sup>Int1<sub>ProS,A</sub>**

|    |             |             |             |
|----|-------------|-------------|-------------|
| H  | -5.22090000 | -3.75098800 | 3.00712900  |
| H  | -2.96263800 | -2.74061000 | 2.84721600  |
| C  | -5.02256100 | -2.97558400 | 2.27388200  |
| C  | -1.00594700 | 0.72669800  | -0.32750900 |
| C  | -3.75315900 | -2.40355000 | 2.18744000  |
| C  | -3.51460800 | -1.40903500 | 1.23732500  |
| C  | -5.71875400 | -1.54803400 | 0.48338100  |
| C  | -6.02321000 | -2.54912400 | 1.40228100  |
| C  | -2.19648000 | -0.76801000 | 1.01953000  |
| C  | -1.05609500 | -1.02654300 | 1.78239000  |
| C  | 0.13678600  | -0.37730700 | 1.46388500  |
| C  | 0.16789200  | 0.51176500  | 0.38986800  |
| N  | -4.50323500 | -0.98500100 | 0.41112000  |
| N  | -2.15093000 | 0.10593000  | -0.01410100 |
| H  | -1.06098900 | 1.40048300  | -1.17510200 |
| H  | -6.45782700 | -1.18874500 | -0.22364400 |
| H  | -7.01825100 | -2.97950600 | 1.42638900  |
| H  | -1.08976400 | -1.71900800 | 2.61485400  |
| H  | 1.03039300  | -0.56711700 | 2.05024200  |
| Cu | -3.92068700 | 0.47100100  | -0.91156800 |
| O  | -3.17538500 | 1.44441100  | -2.41145600 |
| N  | -5.62584900 | 1.25955900  | -1.54096200 |
| C  | -4.07409100 | 1.98551600  | -3.23534100 |
| C  | -3.74416500 | 2.48217300  | -4.45831300 |
| C  | -2.35425600 | 2.38081900  | -5.01978400 |
| C  | -2.33551600 | 2.49843900  | -6.54889600 |
| H  | -1.32149200 | 2.41928600  | -6.95139000 |
| H  | -4.51113900 | 2.89775000  | -5.09978600 |
| H  | -2.76805700 | 3.44784500  | -6.88903400 |
| H  | -2.93088900 | 1.69255400  | -6.98871600 |
| H  | -1.93134000 | 1.41296000  | -4.72408400 |
| C  | -5.44026200 | 1.94529600  | -2.68012000 |
| N  | -6.62336900 | 2.49028100  | -3.07539400 |
| C  | -7.57846800 | 2.13588400  | -2.14092800 |
| C  | -6.95023600 | 1.37666500  | -1.19336400 |
| H  | -7.36020800 | 0.94301500  | -0.29442500 |
| H  | -8.60423200 | 2.46038600  | -2.23007000 |
| C  | -6.89761300 | 3.31382700  | -4.25301400 |
| H  | -6.20737600 | 4.15968700  | -4.28729600 |
| H  | -6.80542500 | 2.72046000  | -5.16652500 |
| H  | -7.91713500 | 3.69269100  | -4.17756200 |
| C  | 1.76807900  | 4.91802600  | -5.63791000 |
| C  | 2.68613500  | 3.86573300  | -5.63332100 |
| C  | 2.31801100  | 2.58759600  | -5.18712200 |
| C  | 1.02323500  | 2.31534600  | -4.72665300 |
| C  | 0.09355700  | 3.34998100  | -4.72066500 |
| C  | 0.49244400  | 4.61476300  | -5.17777200 |
| H  | 2.04278500  | 5.90934000  | -5.98455100 |
| H  | 3.69775700  | 4.04079700  | -5.98426500 |
| H  | 3.05464800  | 1.79049400  | -5.20350200 |
| H  | 0.75851900  | 1.31638400  | -4.39321300 |
| N  | -0.64233200 | 5.46601000  | -5.07619500 |
| H  | -0.63911000 | 6.44611000  | -5.35291300 |
| C  | -1.68544000 | 4.84001200  | -4.60140800 |
| C  | -1.36168800 | 3.41988900  | -4.31837100 |
| H  | -1.50490200 | 3.23274700  | -3.24247700 |
| H  | -2.63707700 | 5.34045900  | -4.46971300 |
| H  | 1.07895200  | 1.03090500  | 0.11366400  |

**<sup>2</sup>Int1<sub>ProR,A</sub>**

|    |             |             |             |
|----|-------------|-------------|-------------|
| H  | -5.89957100 | -3.46002800 | 3.30919900  |
| H  | -3.48621700 | -3.04443400 | 2.92220400  |
| C  | -5.58253800 | -2.81318200 | 2.49718600  |
| C  | -1.02556700 | -0.35392100 | -0.63848400 |
| C  | -4.22469400 | -2.57620600 | 2.28243000  |
| C  | -3.83370800 | -1.74193000 | 1.23356700  |
| C  | -6.06269900 | -1.39379100 | 0.63101000  |
| C  | -6.52104800 | -2.21921900 | 1.65444000  |
| C  | -2.42288100 | -1.44563500 | 0.88846500  |
| C  | -1.31874500 | -1.89627200 | 1.61386400  |
| C  | -0.03662300 | -1.55293800 | 1.18344700  |
| C  | 0.11768700  | -0.77101700 | 0.03912800  |
| N  | -4.75766700 | -1.15432000 | 0.43260200  |
| N  | -2.25463600 | -0.68477800 | -0.21946400 |
| H  | -0.98865400 | 0.25962800  | -1.53224000 |
| H  | -6.74926700 | -0.91333100 | -0.05748100 |
| H  | -7.58465700 | -2.38840400 | 1.78102200  |
| H  | -1.44661100 | -2.49890400 | 2.50515200  |
| H  | 0.83073600  | -1.89229800 | 1.74116600  |
| Cu | -3.95581500 | 0.01887500  | -1.04004700 |
| O  | -3.14997800 | 0.64174300  | -2.68349000 |
| N  | -5.42363300 | 1.24923000  | -1.55377900 |
| C  | -3.85266900 | 1.55368900  | -3.35846900 |
| C  | -3.43254100 | 2.05978500  | -4.54903500 |
| C  | -2.11113400 | 1.69008800  | -5.16215100 |
| C  | -1.68011000 | 2.67369300  | -6.25663900 |
| H  | -1.58594500 | 3.67915500  | -5.83495300 |
| H  | -4.05375200 | 2.76225100  | -5.09006400 |
| H  | -2.41618200 | 2.72647100  | -7.06872600 |
| H  | -0.71247200 | 2.40256700  | -6.68840900 |
| H  | -1.35048800 | 1.67278100  | -4.37156600 |
| C  | -5.11076600 | 1.91357500  | -2.67847400 |
| N  | -6.06007500 | 2.85841000  | -2.92258000 |
| C  | -6.99854600 | 2.77682500  | -1.91128300 |
| C  | -6.59425900 | 1.77967300  | -1.06753000 |
| H  | -7.05436300 | 1.44210800  | -0.15169600 |
| H  | -7.85333200 | 3.43547300  | -1.87903100 |
| C  | -6.10849300 | 3.84127200  | -4.00633600 |
| H  | -5.17638900 | 4.40982600  | -4.03832700 |
| H  | -6.27764400 | 3.34715100  | -4.96674900 |
| H  | -6.93462100 | 4.52552500  | -3.81181300 |
| C  | -0.13576800 | -1.42942300 | -8.36833000 |
| C  | 1.16046100  | -1.49848800 | -7.85378900 |
| C  | 1.45491200  | -1.01398100 | -6.57059700 |
| C  | 0.46689800  | -0.44671500 | -5.75585000 |
| C  | -0.83142800 | -0.36714200 | -6.24853800 |
| C  | -1.09140200 | -0.85845000 | -7.53659900 |
| H  | -0.37310800 | -1.80046500 | -9.36045700 |
| H  | 1.95049800  | -1.93183100 | -8.45812000 |
| H  | 2.47407600  | -1.07959100 | -6.20288500 |
| H  | 0.71829700  | -0.07581200 | -4.76705000 |
| N  | -2.47508600 | -0.64688400 | -7.78635800 |
| H  | -2.93680200 | -0.90262500 | -8.65722700 |
| C  | -3.07506600 | -0.07722800 | -6.77582400 |
| C  | -2.11827600 | 0.17467700  | -5.67077400 |
| H  | -2.44449700 | -0.39194800 | -4.78218700 |
| H  | -4.12989900 | 0.16748600  | -6.80548300 |
| H  | 1.09964400  | -0.48290700 | -0.31925700 |

**<sup>2</sup>TS2<sub>keto,ProS,A</sub>**

|    |             |             |             |
|----|-------------|-------------|-------------|
| H  | -5.91846400 | -3.84309600 | 2.47494600  |
| H  | -3.51259600 | -3.65297200 | 1.91045100  |
| C  | -5.58804400 | -3.11189800 | 1.74386000  |
| C  | -1.02311900 | -0.73341900 | -1.44627600 |
| C  | -4.23294600 | -3.00165100 | 1.43006500  |
| C  | -3.82313400 | -2.05675000 | 0.48800700  |
| C  | -6.03326900 | -1.35791900 | 0.17706500  |
| C  | -6.50810100 | -2.28349000 | 1.10262700  |
| C  | -2.42193100 | -1.87552200 | 0.04345800  |
| C  | -1.33129600 | -2.56686700 | 0.57209100  |
| C  | -0.05575800 | -2.32374600 | 0.06030800  |
| C  | 0.10407400  | -1.39647500 | -0.96831900 |
| N  | -4.72776100 | -1.24224400 | -0.11208600 |
| N  | -2.24813800 | -0.97010300 | -0.95256700 |
| H  | -0.95958200 | 0.00239900  | -2.23976900 |
| H  | -6.70622000 | -0.69552000 | -0.35590400 |
| H  | -7.57074900 | -2.34826600 | 1.30888400  |
| H  | -1.46470700 | -3.28196300 | 1.37499000  |
| H  | 0.80063800  | -2.85411400 | 0.46489000  |
| Cu | -3.90287000 | 0.05195000  | -1.44784900 |
| O  | -3.18969500 | 0.86633200  | -3.12547700 |
| N  | -5.24048400 | 1.49022300  | -1.64491000 |
| C  | -3.90016400 | 1.95348600  | -3.59883100 |
| C  | -3.52821300 | 2.54811000  | -4.75070300 |
| C  | -2.30711300 | 2.09866000  | -5.52414600 |
| C  | -2.30499600 | 2.62034500  | -6.97207100 |
| H  | -2.33101300 | 3.71519200  | -6.98592300 |
| H  | -4.09291700 | 3.38553500  | -5.13933700 |
| H  | -3.17306600 | 2.25303100  | -7.53037300 |
| H  | -1.39993400 | 2.29886500  | -7.49524900 |
| H  | -1.43071400 | 2.52812600  | -5.01504700 |
| C  | -5.01198200 | 2.27598900  | -2.71209700 |
| N  | -5.89304000 | 3.31019000  | -2.71284200 |
| C  | -6.70302600 | 3.16609600  | -1.60236400 |
| C  | -6.28966800 | 2.04105900  | -0.94520700 |
| H  | -6.66017300 | 1.62358700  | -0.02202200 |
| H  | -7.48594900 | 3.87480700  | -1.37843100 |
| C  | -5.99072400 | 4.41468600  | -3.67146700 |
| H  | -5.03747200 | 4.94544600  | -3.73011600 |
| H  | -6.27445300 | 4.03980000  | -4.65814800 |
| H  | -6.75843700 | 5.10470400  | -3.32125200 |
| C  | 0.09270500  | -2.30850500 | -6.04412000 |
| C  | 1.33863700  | -1.89300300 | -5.58113000 |
| C  | 1.52509800  | -0.60349700 | -5.04722300 |
| C  | 0.47031000  | 0.30352900  | -4.95151900 |
| C  | -0.79340200 | -0.09015300 | -5.41212900 |
| C  | -0.94795100 | -1.38408500 | -5.95440400 |
| H  | -0.05132000 | -3.29721400 | -6.46906500 |
| H  | 2.18377300  | -2.57066800 | -5.64780000 |
| H  | 2.51714800  | -0.30447100 | -4.72242600 |
| H  | 0.63894700  | 1.30133300  | -4.55577300 |
| N  | -2.28429600 | -1.49808600 | -6.36579500 |
| H  | -2.68756400 | -2.32500200 | -6.79161900 |
| C  | -2.95293400 | -0.36574000 | -6.12176200 |
| C  | -2.11477900 | 0.56641800  | -5.44429100 |
| H  | -2.62923200 | 0.44274300  | -4.17581200 |
| H  | -3.99429900 | -0.26289200 | -6.40006100 |
| H  | 1.07713300  | -1.18302000 | -1.39608700 |

**<sup>2</sup>TS<sub>2</sub><sub>keto,ProR,A</sub>**

|    |             |             |             |
|----|-------------|-------------|-------------|
| H  | -4.43601200 | -3.30407600 | 2.89971900  |
| H  | -2.28259400 | -2.12493200 | 2.56378600  |
| C  | -4.34764900 | -2.54224400 | 2.13154000  |
| C  | -0.79717800 | 1.36237600  | -0.83280200 |
| C  | -3.13661200 | -1.87473400 | 1.94599900  |
| C  | -3.03795600 | -0.89840100 | 0.95330900  |
| C  | -5.26964000 | -1.23929800 | 0.34754800  |
| C  | -5.43195600 | -2.22910000 | 1.31345500  |
| C  | -1.79257100 | -0.16808700 | 0.62582800  |
| C  | -0.58512200 | -0.33617700 | 1.30556400  |
| C  | 0.54108900  | 0.37213300  | 0.88654600  |
| C  | 0.43819300  | 1.23251700  | -0.20528000 |
| N  | -4.10969500 | -0.58465300 | 0.18309300  |
| N  | -1.88223900 | 0.68528100  | -0.42645900 |
| H  | -0.92654000 | 2.01631900  | -1.68609600 |
| H  | -6.07801400 | -0.96445600 | -0.31996200 |
| H  | -6.38463500 | -2.73732300 | 1.41384500  |
| H  | -0.51483500 | -1.01080400 | 2.15023600  |
| H  | 1.48563600  | 0.24679600  | 1.40660600  |
| Cu | -3.73399600 | 0.86875400  | -1.19560400 |
| O  | -3.24646700 | 1.76962300  | -2.91970500 |
| N  | -5.54274200 | 1.44751900  | -1.74018500 |
| C  | -4.32617300 | 2.09649300  | -3.71645500 |
| C  | -4.11922700 | 2.47530400  | -4.99507300 |
| C  | -2.72325900 | 2.53197900  | -5.57741200 |
| C  | -2.66698300 | 3.29829900  | -6.90983200 |
| H  | -1.64807200 | 3.30505800  | -7.30721800 |
| H  | -4.95548500 | 2.71130000  | -5.64059300 |
| H  | -2.99404600 | 4.33691900  | -6.78847600 |
| H  | -3.31508900 | 2.82219800  | -7.65344000 |
| H  | -2.41222900 | 1.49430500  | -5.77192600 |
| C  | -5.57650700 | 1.96693500  | -2.97963500 |
| N  | -6.85264300 | 2.30770400  | -3.29726900 |
| C  | -7.64713900 | 1.99618800  | -2.21044900 |
| C  | -6.82894700 | 1.46752800  | -1.25068300 |
| H  | -7.08000200 | 1.14287900  | -0.25277000 |
| H  | -8.70892000 | 2.19158000  | -2.21224800 |
| C  | -7.34299000 | 2.91040700  | -4.53999400 |
| H  | -6.78317700 | 3.82250400  | -4.75959300 |
| H  | -7.25037100 | 2.20422300  | -5.36922100 |
| H  | -8.39458300 | 3.16442800  | -4.40633000 |
| C  | 1.77780500  | 3.75273300  | -3.63019400 |
| C  | 2.46287100  | 2.59782500  | -3.99979200 |
| C  | 1.79259400  | 1.51061200  | -4.59392800 |
| C  | 0.41948800  | 1.54267200  | -4.82825600 |
| C  | -0.29319800 | 2.69541800  | -4.47143200 |
| C  | 0.40568000  | 3.77404700  | -3.88559900 |
| H  | 2.29340900  | 4.59979100  | -3.18767200 |
| H  | 3.53515600  | 2.54138200  | -3.84127400 |
| H  | 2.36281400  | 0.63404300  | -4.88543600 |
| H  | -0.07744300 | 0.69723900  | -5.29516900 |
| N  | -0.53087600 | 4.79431000  | -3.65825200 |
| H  | -0.31335700 | 5.69736000  | -3.25190700 |
| C  | -1.74724400 | 4.41847800  | -4.06848900 |
| C  | -1.71959700 | 3.07193400  | -4.53175500 |
| H  | -2.32457400 | 2.42506800  | -3.47923300 |
| H  | -2.59083800 | 5.09353100  | -3.99863200 |
| H  | 1.29079400  | 1.79210500  | -0.57318300 |

**<sup>2</sup>TS<sub>2</sub><sub>enol,ProS,A</sub>**

|    |             |             |             |
|----|-------------|-------------|-------------|
| H  | -5.26729500 | -3.81083100 | 3.08914400  |
| H  | -2.95973300 | -2.92097400 | 2.91545800  |
| C  | -5.01384200 | -3.10602400 | 2.30346400  |
| C  | -0.77060400 | 0.22254100  | -0.44742900 |
| C  | -3.71656300 | -2.60195200 | 2.20889600  |
| C  | -3.40563600 | -1.69709000 | 1.19259500  |
| C  | -5.59808600 | -1.79386200 | 0.38934100  |
| C  | -5.97225500 | -2.70376000 | 1.37405100  |
| C  | -2.05581900 | -1.13074200 | 0.96740600  |
| C  | -0.94803800 | -1.37441800 | 1.77996600  |
| C  | 0.27789300  | -0.79271900 | 1.45206600  |
| C  | 0.37304300  | 0.01682400  | 0.32081300  |
| N  | -4.35432500 | -1.29576200 | 0.30805500  |
| N  | -1.94616900 | -0.33715200 | -0.12606000 |
| H  | -0.77136200 | 0.84073400  | -1.33826800 |
| H  | -6.30205100 | -1.45838900 | -0.36381200 |
| H  | -6.98735600 | -3.08396200 | 1.40446000  |
| H  | -1.03108200 | -2.00269100 | 2.65870700  |
| H  | 1.14705500  | -0.97200600 | 2.07720000  |
| Cu | -3.67135600 | 0.02052400  | -1.08553900 |
| O  | -2.82055300 | 0.86775000  | -2.63077700 |
| N  | -5.29534400 | 0.89709500  | -1.83779300 |
| C  | -3.59605000 | 1.57122400  | -3.40529800 |
| C  | -3.12947300 | 2.17792000  | -4.57784200 |
| C  | -1.64979600 | 2.12761700  | -5.00697600 |
| C  | -1.02232300 | 3.48983900  | -5.30540500 |
| H  | -0.97218600 | 4.09320800  | -4.39312900 |
| H  | -3.71845400 | 2.98108100  | -5.01237100 |
| H  | -1.60298700 | 4.05732800  | -6.04219000 |
| H  | -0.00502300 | 3.37481000  | -5.69280600 |
| H  | -1.06560500 | 1.60955300  | -4.24234100 |
| C  | -4.99787900 | 1.58825100  | -2.95342100 |
| N  | -6.11793900 | 2.21836900  | -3.40716200 |
| C  | -7.14209700 | 1.91719100  | -2.53809600 |
| C  | -6.62100600 | 1.10100800  | -1.56633600 |
| H  | -7.11552800 | 0.68233700  | -0.70346800 |
| H  | -8.13905000 | 2.30709000  | -2.67945900 |
| C  | -6.27194800 | 3.08012900  | -4.58335400 |
| H  | -5.69304800 | 3.99901800  | -4.45994600 |
| H  | -5.95314300 | 2.54956200  | -5.48268900 |
| H  | -7.32642900 | 3.33848300  | -4.68098900 |
| C  | -1.23127500 | -1.95509800 | -8.02672800 |
| C  | -0.90412100 | -2.87711400 | -7.03622200 |
| C  | -0.84766300 | -2.50181800 | -5.68088700 |
| C  | -1.12418200 | -1.19753900 | -5.27526100 |
| C  | -1.44526000 | -0.25073900 | -6.25389100 |
| C  | -1.48879300 | -0.65083100 | -7.60668800 |
| H  | -1.27360400 | -2.24042200 | -9.07327300 |
| H  | -0.68522500 | -3.90254700 | -7.31595400 |
| H  | -0.57946100 | -3.24769900 | -4.93888000 |
| H  | -1.09203800 | -0.92257800 | -4.22503200 |
| N  | -1.81078700 | 0.48348700  | -8.36318400 |
| H  | -1.92974000 | 0.48979200  | -9.36979600 |
| C  | -1.96098800 | 1.55589800  | -7.57498400 |
| C  | -1.81611500 | 1.17423600  | -6.20924600 |
| H  | -3.13729500 | 1.24081500  | -5.71372300 |
| H  | -2.18037300 | 2.52855500  | -7.99464000 |
| H  | 1.30924900  | 0.48430400  | 0.03645900  |

**<sup>2</sup>TS<sub>enol,ProR,A</sub>**

|    |             |             |             |
|----|-------------|-------------|-------------|
| H  | -5.42202400 | -2.98239400 | 3.59107600  |
| H  | -3.04738100 | -2.77313100 | 2.91001800  |
| C  | -5.15288900 | -2.36804200 | 2.73763000  |
| C  | -0.82985800 | -0.37592600 | -0.99886100 |
| C  | -3.81635200 | -2.24682500 | 2.35741100  |
| C  | -3.48612700 | -1.45506300 | 1.25639800  |
| C  | -5.73522200 | -0.92286300 | 0.92130000  |
| C  | -6.13366300 | -1.70421200 | 2.00223900  |
| C  | -2.11269000 | -1.30507700 | 0.72427600  |
| C  | -0.98095300 | -1.91004300 | 1.27241600  |
| C  | 0.25544800  | -1.73195400 | 0.65021600  |
| C  | 0.33543100  | -0.95877600 | -0.50719100 |
| N  | -4.44773100 | -0.78975700 | 0.56626000  |
| N  | -2.01365500 | -0.54238900 | -0.39183000 |
| H  | -0.84438600 | 0.23217100  | -1.89592000 |
| H  | -6.46061900 | -0.39838300 | 0.31073800  |
| H  | -7.18531500 | -1.78719600 | 2.25324800  |
| H  | -1.05342700 | -2.51600500 | 2.16756200  |
| H  | 1.14316200  | -2.19895900 | 1.06520000  |
| Cu | -3.72217600 | 0.33254200  | -0.97632800 |
| O  | -2.96685900 | 1.00245900  | -2.66170100 |
| N  | -5.23002400 | 1.53082600  | -1.49598300 |
| C  | -3.75920800 | 1.72879800  | -3.39269300 |
| C  | -3.40862400 | 2.17639100  | -4.67369200 |
| C  | -2.06991100 | 1.81765600  | -5.34552500 |
| C  | -2.18127900 | 1.02856500  | -6.65117800 |
| H  | -1.19708600 | 0.89064000  | -7.11012700 |
| H  | -4.21594500 | 2.44592000  | -5.35126700 |
| H  | -2.82785900 | 1.53129500  | -7.37989600 |
| H  | -2.60844500 | 0.03891200  | -6.45978200 |
| H  | -1.45542000 | 1.26290300  | -4.63209800 |
| C  | -5.01682200 | 2.07341700  | -2.70834300 |
| N  | -6.05449000 | 2.89589100  | -3.02699700 |
| C  | -6.94178400 | 2.86801700  | -1.97426500 |
| C  | -6.41985500 | 2.02132700  | -1.02955300 |
| H  | -6.81888200 | 1.77323000  | -0.05833000 |
| H  | -7.85022500 | 3.45165100  | -1.98137100 |
| C  | -6.24469800 | 3.70294300  | -4.23580700 |
| H  | -5.35766500 | 4.31214700  | -4.41883500 |
| H  | -6.44500900 | 3.06006400  | -5.09699200 |
| H  | -7.10057600 | 4.35925200  | -4.07767700 |
| C  | 0.99056800  | 5.86265200  | -4.80665700 |
| C  | 1.64942400  | 5.44247900  | -3.65443400 |
| C  | 1.30783800  | 4.23371400  | -3.01986300 |
| C  | 0.29385400  | 3.41563200  | -3.51386800 |
| C  | -0.37867900 | 3.81199000  | -4.67434900 |
| C  | -0.01140400 | 5.02530800  | -5.29498300 |
| H  | 1.25263100  | 6.79338900  | -5.30022000 |
| H  | 2.44262800  | 6.05694900  | -3.24114200 |
| H  | 1.85020500  | 3.93591100  | -2.12784000 |
| H  | 0.03490200  | 2.48934200  | -3.00936200 |
| N  | -0.81986000 | 5.17050200  | -6.43004400 |
| H  | -0.78711700 | 5.96198400  | -7.06260100 |
| C  | -1.65617800 | 4.13283200  | -6.55548900 |
| C  | -1.49962800 | 3.24854700  | -5.44675600 |
| H  | -2.68343500 | 3.46587800  | -4.71584300 |
| H  | -2.33497400 | 4.06359900  | -7.39517100 |
| H  | 1.27738200  | -0.80891800 | -1.02296300 |

**<sup>2</sup>Prod<sub>keto,ProS,A</sub>**

|    |             |             |             |
|----|-------------|-------------|-------------|
| H  | -6.02827000 | -4.09887300 | 2.27812100  |
| H  | -3.59679400 | -3.71685900 | 2.00368600  |
| C  | -5.67364100 | -3.30727900 | 1.62548000  |
| C  | -0.93877400 | -0.40988500 | -0.81772800 |
| C  | -4.30357700 | -3.08987400 | 1.47341800  |
| C  | -3.86246500 | -2.06681800 | 0.63134200  |
| C  | -6.06879800 | -1.50024200 | 0.10724800  |
| C  | -6.57581700 | -2.50377300 | 0.92971100  |
| C  | -2.43300900 | -1.75390600 | 0.38189400  |
| C  | -1.37025100 | -2.39640100 | 1.02024100  |
| C  | -0.06104000 | -2.02085000 | 0.71813600  |
| C  | 0.16334600  | -1.01085900 | -0.21674800 |
| N  | -4.75221200 | -1.28832100 | -0.03172100 |
| N  | -2.19871000 | -0.77265100 | -0.52629700 |
| H  | -0.82504100 | 0.38386500  | -1.54898900 |
| H  | -6.72483300 | -0.84898200 | -0.46145800 |
| H  | -7.64739100 | -2.64604600 | 1.01680800  |
| H  | -1.55248800 | -3.17455400 | 1.75152000  |
| H  | 0.77175300  | -2.51114600 | 1.21253800  |
| Cu | -3.84728600 | 0.14175300  | -1.20993000 |
| O  | -3.06366000 | 0.95152000  | -3.04601700 |
| N  | -5.17507000 | 1.53927300  | -1.62664900 |
| C  | -3.84896100 | 1.96272800  | -3.62057800 |
| C  | -3.54212200 | 2.48132900  | -4.82224100 |
| C  | -2.31047000 | 2.12433400  | -5.63431100 |
| C  | -2.38288800 | 2.74302600  | -7.04982200 |
| H  | -2.48766700 | 3.83175800  | -6.98944200 |
| H  | -4.19567600 | 3.23810700  | -5.23775200 |
| H  | -3.23315100 | 2.34139600  | -7.61094700 |
| H  | -1.47144300 | 2.52090000  | -7.61074800 |
| H  | -1.45232300 | 2.58574300  | -5.12178600 |
| C  | -4.94999800 | 2.28755700  | -2.72084400 |
| N  | -5.84399900 | 3.31276100  | -2.76338900 |
| C  | -6.66075300 | 3.19652400  | -1.65589900 |
| C  | -6.23598900 | 2.10081700  | -0.95689500 |
| H  | -6.61065700 | 1.70178600  | -0.02665800 |
| H  | -7.45776500 | 3.89944100  | -1.46630900 |
| C  | -5.95189600 | 4.39093900  | -3.75142800 |
| H  | -4.98669300 | 4.88857400  | -3.86935800 |
| H  | -6.29547800 | 3.99910500  | -4.71233500 |
| H  | -6.67910400 | 5.11619600  | -3.38624000 |
| C  | 0.13609100  | -2.26117800 | -6.17577600 |
| C  | 1.42751300  | -1.75838900 | -5.99151000 |
| C  | 1.64972700  | -0.40258700 | -5.69013700 |
| C  | 0.58815600  | 0.48979600  | -5.56232200 |
| C  | -0.72509600 | 0.01214500  | -5.74369500 |
| C  | -0.91993000 | -1.35977600 | -6.05159400 |
| H  | -0.02853600 | -3.30596700 | -6.42154800 |
| H  | 2.27534000  | -2.42820000 | -6.09444300 |
| H  | 2.66741300  | -0.04563700 | -5.56824200 |
| H  | 0.77746700  | 1.53722000  | -5.34417100 |
| N  | -2.28874300 | -1.55580900 | -6.19739300 |
| H  | -2.72807000 | -2.42838400 | -6.45918500 |
| C  | -2.94701800 | -0.37911700 | -6.00737900 |
| C  | -2.02901200 | 0.63394800  | -5.70762100 |
| H  | -2.60650700 | 0.47087900  | -3.78955000 |
| H  | -4.02039600 | -0.31784800 | -6.12845500 |
| H  | 1.16602800  | -0.68814600 | -0.47421300 |

**<sup>2</sup>Prod<sub>keto</sub>,ProR,A**

|    |             |             |             |
|----|-------------|-------------|-------------|
| H  | -3.15895100 | -4.66661600 | 0.96621300  |
| H  | -1.81481000 | -2.85148200 | 1.97402000  |
| C  | -3.30188400 | -3.64084400 | 0.64100400  |
| C  | -1.65939100 | 2.16877900  | 1.24555400  |
| C  | -2.54512000 | -2.61656500 | 1.20937800  |
| C  | -2.74222800 | -1.29948800 | 0.78402800  |
| C  | -4.38220800 | -1.99745400 | -0.71920500 |
| C  | -4.23992700 | -3.33073600 | -0.34195100 |
| C  | -1.99324100 | -0.13782500 | 1.33783500  |
| C  | -1.05508000 | -0.24933500 | 2.36859900  |
| C  | -0.41097800 | 0.89466100  | 2.83768600  |
| C  | -0.71529500 | 2.13000300  | 2.26825300  |
| N  | -3.65478000 | -1.01095700 | -0.17442700 |
| N  | -2.27973800 | 1.06888900  | 0.79042400  |
| H  | -1.93738900 | 3.10674700  | 0.77477300  |
| H  | -5.10117300 | -1.70262900 | -1.47735800 |
| H  | -4.85104800 | -4.09705600 | -0.80609300 |
| H  | -0.82948100 | -1.21110800 | 2.81281800  |
| H  | 0.31470800  | 0.81875100  | 3.64146400  |
| Cu | -3.77983400 | 1.00127000  | -0.60260200 |
| O  | -3.22119600 | 1.43019200  | -3.01735600 |
| N  | -5.17250600 | 2.15673900  | -1.38554400 |
| C  | -4.13761800 | 2.26822300  | -3.60322400 |
| C  | -4.02352500 | 2.68528600  | -4.89397000 |
| C  | -2.96611800 | 2.21481000  | -5.87399900 |
| C  | -3.45993900 | 2.31811200  | -7.32839600 |
| H  | -2.68686100 | 1.97588900  | -8.02194700 |
| H  | -4.72813000 | 3.41648300  | -5.26717600 |
| H  | -3.72016800 | 3.34954300  | -7.59155500 |
| H  | -4.34975100 | 1.69668100  | -7.47183100 |
| H  | -2.73522900 | 1.16081500  | -5.67249000 |
| C  | -5.21523900 | 2.56593800  | -2.67223600 |
| N  | -6.39593300 | 3.22465500  | -2.90275000 |
| C  | -7.09574000 | 3.23616400  | -1.72004700 |
| C  | -6.33204600 | 2.57375000  | -0.79242000 |
| H  | -6.55010400 | 2.37816500  | 0.24675300  |
| H  | -8.06421100 | 3.70702600  | -1.64097900 |
| C  | -6.91465700 | 3.80117500  | -4.14624900 |
| H  | -6.33776600 | 4.68352600  | -4.43598200 |
| H  | -6.89486400 | 3.05628400  | -4.94503500 |
| H  | -7.94830800 | 4.10217700  | -3.97482500 |
| C  | 1.68282100  | 3.58730800  | -4.46394000 |
| C  | 2.12476000  | 2.31695800  | -4.06060900 |
| C  | 1.29342800  | 1.18851400  | -4.14670500 |
| C  | -0.00835400 | 1.29240000  | -4.63535100 |
| C  | -0.48542000 | 2.55996600  | -5.03444500 |
| C  | 0.38320500  | 3.68177100  | -4.93856200 |
| H  | 2.34226800  | 4.44833600  | -4.41444000 |
| H  | 3.13855300  | 2.20635500  | -3.68933000 |
| H  | 1.67941600  | 0.21925900  | -3.84840800 |
| H  | -0.62312700 | 0.40078800  | -4.73833300 |
| N  | -0.32107300 | 4.78379600  | -5.42764000 |
| H  | 0.05461100  | 5.71923100  | -5.52486100 |
| C  | -1.55748500 | 4.40445300  | -5.81773500 |
| C  | -1.71950100 | 3.02138100  | -5.60289000 |
| H  | -2.35855700 | 1.49843200  | -3.46207600 |
| H  | -2.24978900 | 5.11973200  | -6.24010300 |
| H  | -0.24189100 | 3.04449500  | 2.60843700  |

**<sup>2</sup>Prod<sub>enol</sub>,ProS,A**

|    |             |             |              |
|----|-------------|-------------|--------------|
| H  | -2.64880800 | -4.89720200 | 2.15783400   |
| H  | -2.19056500 | -2.72684900 | 3.24989700   |
| C  | -2.87430600 | -3.97055400 | 1.63935100   |
| C  | -2.80500700 | 2.09138700  | 1.80242600   |
| C  | -2.61740600 | -2.74649200 | 2.25473100   |
| C  | -2.91379200 | -1.55902700 | 1.57914900   |
| C  | -3.68913200 | -2.76892800 | -0.25966000  |
| C  | -3.42078300 | -3.98745100 | 0.35732300   |
| C  | -2.67480100 | -0.20780000 | 2.15698000   |
| C  | -2.15900300 | -0.00010200 | 3.44007300   |
| C  | -1.96635100 | 1.30283900  | 3.89789100   |
| C  | -2.29265500 | 2.37305900  | 3.06667400   |
| N  | -3.44650800 | -1.58916400 | 0.33269800   |
| N  | -2.98961300 | 0.83995800  | 1.35974800   |
| H  | -3.07785600 | 2.88852700  | 1.11716700   |
| H  | -4.11288600 | -2.72619700 | -1.25786200  |
| H  | -3.63740800 | -4.91788200 | -0.15581700  |
| H  | -1.91025000 | -0.83567900 | 4.08285300   |
| H  | -1.56759300 | 1.47578300  | 4.89259200   |
| Cu | -3.80718600 | 0.23353600  | -0.47300400  |
| O  | -2.90629300 | 0.15021100  | -2.62857900  |
| N  | -4.88965000 | 1.55733600  | -1.53001200  |
| C  | -3.43661200 | 0.97219500  | -3.38085900  |
| C  | -2.96517200 | 1.14581800  | -4.81712700  |
| C  | -1.65207100 | 0.38255700  | -5.13422700  |
| C  | -0.43649100 | 1.05013500  | -4.46653000  |
| H  | -0.55242500 | 1.05702100  | -3.38007300  |
| H  | -2.83958700 | 2.21436700  | -5.03342700  |
| H  | -0.31181800 | 2.08787300  | -4.79889100  |
| H  | 0.48340700  | 0.50537800  | -4.69893000  |
| H  | -1.76066400 | -0.62431400 | -4.71262700  |
| C  | -4.55366000 | 1.75539300  | -2.81775900  |
| N  | -5.38314900 | 2.70092700  | -3.36851900  |
| C  | -6.25260000 | 3.09533400  | -2.38942800  |
| C  | -5.93427800 | 2.37993000  | -1.25257800  |
| H  | -6.40272900 | 2.41577600  | -0.27994000  |
| H  | -7.01837600 | 3.83476700  | -2.57278000  |
| C  | -5.40484100 | 3.24080300  | -4.73388300  |
| H  | -4.49708800 | 3.81457500  | -4.93429600  |
| H  | -5.50865700 | 2.43461500  | -5.46207300  |
| H  | -6.26541900 | 3.90392400  | -4.82181700  |
| C  | -2.00582500 | -1.27996900 | -9.88383200  |
| C  | -2.84745200 | -2.38012400 | -9.62022800  |
| C  | -3.28685600 | -2.66967200 | -8.32204800  |
| C  | -2.90629500 | -1.87087900 | -7.24176400  |
| C  | -2.07022000 | -0.75798000 | -7.47521700  |
| C  | -1.63746600 | -0.49665200 | -8.80339100  |
| H  | -1.66538500 | -1.07019300 | -10.89315200 |
| H  | -3.15300900 | -3.01642700 | -10.44452200 |
| H  | -3.92623700 | -3.53027400 | -8.15581600  |
| H  | -3.24183000 | -2.11348700 | -6.23757500  |
| N  | -0.81408500 | 0.63071800  | -8.74681000  |
| H  | -0.33449700 | 1.04452000  | -9.53715900  |
| C  | -0.71768600 | 1.06323500  | -7.47251600  |
| C  | -1.48791400 | 0.23734800  | -6.62561900  |
| H  | -3.77994900 | 0.80219400  | -5.47169700  |
| H  | -0.10474800 | 1.91808800  | -7.22343700  |
| H  | -2.15758000 | 3.40103500  | 3.38482500   |

**<sup>2</sup>Prod<sub>enol,ProR,A</sub>**

|    |             |             |             |
|----|-------------|-------------|-------------|
| H  | -5.81358800 | -4.93452900 | 1.27103600  |
| H  | -3.56583200 | -4.11343000 | 1.89492400  |
| C  | -5.48008000 | -3.95781600 | 0.93466300  |
| C  | -1.04418900 | 0.18373000  | 0.92776100  |
| C  | -4.21252800 | -3.49443300 | 1.28508700  |
| C  | -3.79666600 | -2.23382100 | 0.84543500  |
| C  | -5.82993300 | -1.90822400 | -0.24548000 |
| C  | -6.30841300 | -3.15401900 | 0.15330800  |
| C  | -2.46265400 | -1.65443600 | 1.16357700  |
| C  | -1.48862700 | -2.33044700 | 1.90432200  |
| C  | -0.26449300 | -1.71299000 | 2.15616000  |
| C  | -0.03287100 | -0.43119900 | 1.66019400  |
| N  | -4.61123200 | -1.46162700 | 0.08847700  |
| N  | -2.22523000 | -0.40712000 | 0.68807800  |
| H  | -0.91466000 | 1.18029200  | 0.51800200  |
| H  | -6.43616800 | -1.24184200 | -0.85200600 |
| H  | -7.30070600 | -3.47797500 | -0.14096300 |
| H  | -1.67333100 | -3.32793200 | 2.28358800  |
| H  | 0.49653700  | -2.23009600 | 2.73216200  |
| Cu | -3.75861600 | 0.40007500  | -0.36112400 |
| O  | -2.77531700 | 1.29265500  | -2.26290000 |
| N  | -4.99389300 | 1.89130000  | -0.91211800 |
| C  | -3.46160700 | 2.18705800  | -2.76642100 |
| C  | -3.03972000 | 2.86961100  | -4.05910200 |
| C  | -1.85110800 | 2.16983000  | -4.76921000 |
| C  | -2.27838100 | 0.83164700  | -5.39793200 |
| H  | -1.43339200 | 0.34999400  | -5.89882000 |
| H  | -3.89907500 | 2.93110400  | -4.73857500 |
| H  | -3.07926600 | 0.96796800  | -6.13480300 |
| H  | -2.64254300 | 0.14585200  | -4.62907100 |
| H  | -1.10024900 | 1.95823000  | -3.99799500 |
| C  | -4.68818200 | 2.56264200  | -2.03756700 |
| N  | -5.64202100 | 3.52149500  | -2.27387700 |
| C  | -6.56047300 | 3.43500100  | -1.26471600 |
| C  | -6.14792900 | 2.41767700  | -0.42721000 |
| H  | -6.61380700 | 2.05970400  | 0.47921800  |
| H  | -7.41648700 | 4.09209400  | -1.21638800 |
| C  | -5.73487300 | 4.49358000  | -3.37061400 |
| H  | -4.82483500 | 5.09308900  | -3.42743600 |
| H  | -5.91073400 | 3.98405700  | -4.32078300 |
| H  | -6.57678000 | 5.15491200  | -3.16608400 |
| C  | 0.94603200  | 5.80028900  | -6.87781600 |
| C  | 1.59019400  | 6.22940600  | -5.69962500 |
| C  | 1.32471700  | 5.62961800  | -4.46178400 |
| C  | 0.40540300  | 4.58407400  | -4.35441100 |
| C  | -0.26085300 | 4.13709200  | -5.51550300 |
| C  | 0.03650800  | 4.76331500  | -6.75602900 |
| H  | 1.16545400  | 6.26764700  | -7.83284800 |
| H  | 2.31096700  | 7.03841600  | -5.76029700 |
| H  | 1.84625900  | 5.98019100  | -3.57736600 |
| H  | 0.21871000  | 4.11767300  | -3.39129400 |
| N  | -0.73335000 | 4.12126500  | -7.72879300 |
| H  | -0.71798100 | 4.33192000  | -8.71931600 |
| C  | -1.47125100 | 3.14591800  | -7.15802300 |
| C  | -1.22497600 | 3.10818800  | -5.76935000 |
| H  | -2.78117700 | 3.90925200  | -3.80855800 |
| H  | -2.11943900 | 2.52119900  | -7.75645400 |
| H  | 0.90484200  | 0.08468900  | 1.83483700  |

**Model B structures:****<sup>2</sup>Re<sub>pros,B</sub>**

|   |             |             |             |
|---|-------------|-------------|-------------|
| C | 22.08898400 | 29.09695000 | 9.69391200  |
| H | 21.80758000 | 28.79021000 | 10.70641300 |
| H | 23.02871900 | 29.66217300 | 9.70542300  |
| C | 20.97427300 | 29.90921000 | 9.09011100  |
| O | 21.02909900 | 30.98334500 | 8.56803700  |
| C | 18.67568300 | 28.10309900 | 13.56914000 |
| H | 18.11878700 | 28.62319400 | 12.78008000 |
| C | 17.72202200 | 27.24104700 | 14.43090800 |
| H | 17.37417600 | 26.40685500 | 13.80770000 |
| H | 18.31048700 | 26.79404700 | 15.24142800 |
| C | 16.49467800 | 27.95677800 | 15.02191100 |
| H | 16.80435200 | 28.78142600 | 15.67695000 |
| C | 15.49948500 | 28.47781300 | 13.97627200 |
| H | 15.15707500 | 27.67063600 | 13.31788200 |
| H | 14.61502800 | 28.90803100 | 14.45971000 |
| H | 15.93328200 | 29.25694700 | 13.33517200 |
| C | 19.46591000 | 29.08762400 | 14.41753400 |
| O | 20.53040600 | 28.79441600 | 14.95337700 |
| N | 18.89252500 | 30.33100300 | 14.55120700 |
| H | 17.92834100 | 30.43653700 | 14.26021300 |
| C | 19.35511800 | 31.29126900 | 15.55141800 |
| H | 20.39835500 | 31.05459800 | 15.74715300 |
| C | 19.21988300 | 32.70112300 | 14.98267000 |
| H | 19.75999000 | 32.75773300 | 14.02962200 |
| H | 18.16923900 | 32.89932100 | 14.74586600 |
| C | 19.74197500 | 33.80859900 | 15.89101100 |
| O | 19.52649500 | 35.02575800 | 15.46187600 |
| O | 20.33248900 | 33.53345500 | 16.94104200 |
| C | 18.47796800 | 31.11919200 | 16.80821000 |
| O | 17.27651000 | 31.44473100 | 16.73379400 |
| N | 19.00892600 | 30.53458200 | 17.89041300 |
| C | 20.43501600 | 30.18960900 | 18.09750200 |
| H | 21.06040900 | 31.06716900 | 17.91133500 |
| H | 20.73232800 | 29.39219100 | 17.40817600 |
| C | 20.48076800 | 29.73342000 | 19.56523400 |
| H | 20.66348000 | 30.59352300 | 20.22083000 |
| H | 21.27512500 | 29.00287900 | 19.74194300 |
| C | 19.07140000 | 29.17291700 | 19.81817900 |
| H | 18.81023300 | 29.13326800 | 20.87919000 |
| H | 18.99004400 | 28.15732700 | 19.41313400 |
| C | 18.16695500 | 30.13469400 | 19.03751700 |
| H | 17.24625400 | 29.67407000 | 18.66889400 |
| N | 16.24408000 | 32.11261400 | 21.31973400 |
| H | 16.43238600 | 33.03796800 | 21.70511300 |
| C | 14.98934400 | 32.14997800 | 20.55461700 |
| H | 14.14065000 | 32.57007200 | 21.12350800 |
| C | 15.17597200 | 32.94372300 | 19.25742400 |
| H | 15.54526800 | 33.95110900 | 19.50601400 |
| H | 15.95251700 | 32.45882900 | 18.65548000 |
| C | 13.87097400 | 33.08194900 | 18.46201500 |
| H | 13.46917000 | 32.08800600 | 18.21873500 |
| H | 13.11363800 | 33.56599300 | 19.09119800 |
| C | 14.01213200 | 33.90728700 | 17.17121700 |
| H | 13.01879900 | 34.24302100 | 16.83969000 |
| H | 14.59898900 | 34.81293700 | 17.38514000 |
| C | 14.67102200 | 33.12315000 | 16.03934800 |
| H | 15.64797200 | 32.70883100 | 16.30167600 |
| H | 14.03217200 | 32.30179300 | 15.70212400 |
| N | 14.88400600 | 34.02439000 | 14.84520600 |
| H | 15.60920900 | 34.75348000 | 15.02006400 |



|    |             |             |             |
|----|-------------|-------------|-------------|
| H  | 15.26105000 | 33.54100700 | 13.99838800 |
| H  | 14.01319400 | 34.49650200 | 14.58305400 |
| C  | 24.84774100 | 33.90301200 | 20.50697900 |
| H  | 24.24762000 | 33.26021200 | 19.84843800 |
| C  | 23.99012500 | 34.95715300 | 21.22403700 |
| H  | 23.18968400 | 34.43653300 | 21.76332800 |
| H  | 24.59456600 | 35.47376600 | 21.97674500 |
| C  | 23.39041100 | 36.03670500 | 20.28689800 |
| H  | 22.68907200 | 36.65355900 | 20.86193800 |
| H  | 24.19825100 | 36.68382400 | 19.93121100 |
| C  | 22.70721000 | 35.47601500 | 19.04419800 |
| O  | 23.32575500 | 35.33569300 | 17.98152800 |
| N  | 21.37988900 | 35.16628600 | 19.12742400 |
| H  | 20.95981400 | 35.05113300 | 20.04193800 |
| H  | 20.97860700 | 34.61440500 | 18.35417500 |
| C  | 26.00062200 | 34.48137500 | 19.68831700 |
| O  | 26.49518400 | 34.00931600 | 18.71454000 |
| C  | 26.38627900 | 33.08396800 | 15.33536900 |
| C  | 26.65403400 | 34.53392500 | 14.93020500 |
| H  | 20.43755800 | 34.77571100 | 8.27177800  |
| H  | 22.10025200 | 33.70108300 | 9.76919600  |
| O  | 25.89227200 | 35.44421000 | 15.28789300 |
| C  | 24.90544200 | 32.84371600 | 15.68679900 |
| C  | 20.43276800 | 34.99858100 | 9.33441800  |
| C  | 22.92987700 | 34.12983800 | 14.78434100 |
| C  | 21.35936000 | 34.38357200 | 10.17478500 |
| C  | 21.33303300 | 34.68188200 | 11.54151800 |
| C  | 19.55696300 | 36.16604800 | 11.22972500 |
| C  | 19.51033800 | 35.90260000 | 9.86381900  |
| C  | 22.25933400 | 34.09178300 | 12.53561300 |
| C  | 23.23242300 | 33.13473300 | 12.24270700 |
| C  | 24.07462000 | 32.69560800 | 13.26605900 |
| C  | 23.96024500 | 33.20621900 | 14.56333600 |
| N  | 20.43977400 | 35.56908200 | 12.04140900 |
| N  | 22.12083300 | 34.54979000 | 13.80463900 |
| H  | 26.71394700 | 32.39102500 | 14.55406300 |
| H  | 24.78334100 | 31.78326100 | 15.94259000 |
| H  | 24.64990600 | 33.42600900 | 16.57453800 |
| H  | 22.76535400 | 34.54530700 | 15.77483000 |
| H  | 18.88908600 | 36.87814100 | 11.70382600 |
| H  | 18.78379000 | 36.40530400 | 9.23431000  |
| H  | 23.35073000 | 32.74687000 | 11.23503400 |
| H  | 24.83742700 | 31.95612200 | 13.03729500 |
| N  | 27.74834600 | 34.79821000 | 14.17785500 |
| H  | 27.82867700 | 35.76571600 | 13.88024700 |
| C  | 28.72430900 | 33.86550000 | 13.61581500 |
| H  | 28.79550100 | 32.99758900 | 14.27505100 |
| C  | 28.41662200 | 33.40896400 | 12.17471400 |
| H  | 28.95668900 | 32.46951700 | 11.99109000 |
| H  | 27.34812600 | 33.17032700 | 12.09475400 |
| C  | 28.83290800 | 34.38493900 | 11.06413300 |
| H  | 29.91890600 | 34.53020300 | 11.08858100 |
| H  | 28.59283300 | 33.96177100 | 10.08226500 |
| S  | 28.15988200 | 36.09493600 | 11.13889600 |
| C  | 26.39392600 | 35.78933300 | 10.78587200 |
| H  | 25.91892000 | 36.77011500 | 10.69675500 |
| H  | 26.27360700 | 35.25655000 | 9.83703800  |
| H  | 25.90376700 | 35.23222700 | 11.59029200 |
| Cu | 20.74392700 | 35.99399900 | 14.05795200 |
| O  | 19.55289400 | 37.61247800 | 14.10475100 |
| N  | 22.01740500 | 37.35984700 | 14.97776000 |
| C  | 20.02168800 | 38.64022300 | 14.68987300 |
| C  | 19.23523900 | 39.85336500 | 14.77820500 |

|   |             |             |             |
|---|-------------|-------------|-------------|
| C | 18.05305900 | 39.95096300 | 14.13904200 |
| C | 17.17606900 | 41.15510500 | 14.13955000 |
| H | 17.00713500 | 41.50633100 | 13.11273600 |
| H | 19.60979300 | 40.68576400 | 15.35901900 |
| H | 17.59318300 | 41.97540000 | 14.72920900 |
| H | 16.18954900 | 40.90032300 | 14.54737700 |
| H | 17.71309300 | 39.09501500 | 13.55953600 |
| C | 21.37203100 | 38.52021900 | 15.20390000 |
| N | 22.20510000 | 39.37710100 | 15.88678800 |
| C | 23.37887200 | 38.71627500 | 16.08646200 |
| C | 23.25283200 | 37.46053800 | 15.50685200 |
| H | 23.99550500 | 36.67776500 | 15.46284700 |
| H | 24.20958400 | 39.12680300 | 16.64050400 |
| C | 21.95027400 | 40.74130500 | 16.36596400 |
| H | 22.85252600 | 41.09054700 | 16.86854600 |
| H | 21.73956400 | 41.40495300 | 15.52444600 |
| H | 21.12265200 | 40.74019900 | 17.07956500 |
| C | 16.47820100 | 37.93267200 | 16.94900000 |
| C | 16.12181900 | 39.25823000 | 17.28538500 |
| C | 16.98414900 | 40.06861300 | 18.01275600 |
| C | 18.22655600 | 39.54943000 | 18.42380500 |
| C | 18.55933400 | 38.20640100 | 18.07884400 |
| C | 17.69761300 | 37.38697900 | 17.33917200 |
| C | 19.32827700 | 40.06704600 | 19.18779700 |
| C | 20.25408700 | 39.05689500 | 19.28674400 |
| N | 19.80674300 | 37.93991000 | 18.60720000 |
| H | 15.77115100 | 37.31852800 | 16.39573600 |
| H | 15.14917200 | 39.64082900 | 16.98764000 |
| H | 16.69570300 | 41.08189100 | 18.27921300 |
| H | 17.98199200 | 36.37237600 | 17.07962700 |
| H | 19.40425800 | 41.04651900 | 19.64021300 |
| H | 21.20388600 | 39.03766100 | 19.80450200 |
| H | 20.27419900 | 37.03745600 | 18.60381100 |
| O | 23.54070500 | 32.19659200 | 9.08001900  |
| H | 22.75221000 | 31.80254400 | 8.65807500  |
| H | 24.16830400 | 32.35804300 | 8.35858000  |
| O | 16.50078800 | 33.55281300 | 12.69545900 |
| H | 16.89307500 | 34.41337200 | 12.95730600 |
| H | 16.34729500 | 33.58505400 | 11.73925600 |
| O | 17.15812300 | 35.62186300 | 14.43162400 |
| H | 17.22720900 | 36.58979000 | 14.49092500 |
| H | 18.03006800 | 35.31806800 | 14.83658500 |
| O | 25.47035800 | 37.20542300 | 17.59061200 |
| H | 26.08504200 | 36.79275700 | 16.95987900 |
| H | 24.81775100 | 36.49250700 | 17.73211400 |
| H | 22.20369100 | 28.18003400 | 9.10407200  |
| H | 26.98981500 | 32.86373300 | 16.22513600 |
| H | 25.32118800 | 33.25150400 | 21.25434500 |
| H | 16.13481900 | 31.49633400 | 22.12388700 |
| H | 14.71872200 | 31.11526100 | 20.30991400 |
| H | 19.40523800 | 27.44648800 | 13.08627600 |
| H | 29.70401500 | 34.35514700 | 13.65107300 |
| H | 17.88368800 | 31.00657200 | 19.63964500 |
| H | 15.97457900 | 27.24063100 | 15.67050400 |

**<sup>2</sup>Re<sub>proR,B</sub>**

|   |             |             |             |
|---|-------------|-------------|-------------|
| C | 22.08898400 | 29.09695000 | 9.69391200  |
| H | 21.77832200 | 28.81475700 | 10.70534200 |
| H | 23.02983400 | 29.65993200 | 9.72037700  |
| C | 20.99409200 | 29.90019800 | 9.04406800  |
| O | 21.06195400 | 30.97559900 | 8.52616500  |
| C | 18.62123200 | 28.09351100 | 13.50336300 |
| H | 18.02119100 | 28.58044200 | 12.72475800 |

|   |             |             |             |    |             |             |             |
|---|-------------|-------------|-------------|----|-------------|-------------|-------------|
| C | 17.72202200 | 27.24104700 | 14.43090800 | C  | 22.74326800 | 35.34506300 | 19.01887100 |
| H | 17.38645100 | 26.36907700 | 13.85427100 | O  | 23.46886400 | 35.16821500 | 18.01954800 |
| H | 18.34794200 | 26.84773900 | 15.24144700 | N  | 21.45336200 | 34.96774100 | 19.03039800 |
| C | 16.48394500 | 27.93288300 | 15.02817700 | H  | 20.88316700 | 35.09695800 | 19.85333200 |
| H | 16.77647800 | 28.78757000 | 15.65132800 | H  | 21.04058600 | 34.51063400 | 18.20785600 |
| C | 15.44554800 | 28.38241400 | 13.99157600 | C  | 26.16521500 | 34.80281200 | 19.87870900 |
| H | 15.12111100 | 27.54258700 | 13.36561000 | O  | 26.75201200 | 34.51816100 | 18.88081000 |
| H | 14.55569900 | 28.79166100 | 14.48307800 | C  | 26.39557100 | 33.20285900 | 15.35093900 |
| H | 15.83200800 | 29.15842700 | 13.31725200 | C  | 26.61175000 | 34.62231600 | 14.82809400 |
| C | 19.42277400 | 29.11425300 | 14.29349100 | H  | 20.52032000 | 34.84963000 | 8.26291800  |
| O | 20.53620300 | 28.87365200 | 14.75166000 | H  | 22.14765800 | 33.73509600 | 9.77132100  |
| N | 18.79490600 | 30.32243400 | 14.48058400 | O  | 25.78116300 | 35.51873400 | 15.05785600 |
| H | 17.81490400 | 30.38930200 | 14.23570200 | C  | 24.92413500 | 32.90706100 | 15.70502900 |
| C | 19.27033900 | 31.29402300 | 15.46101100 | C  | 20.50299000 | 35.05919200 | 9.32813200  |
| H | 20.32259300 | 31.07481700 | 15.62444800 | C  | 22.91365800 | 34.11702300 | 14.79785400 |
| C | 19.09842400 | 32.70120400 | 14.90014500 | C  | 21.40922700 | 34.42221500 | 10.17412700 |
| H | 19.59087400 | 32.76001000 | 13.92122000 | C  | 21.36715100 | 34.70434100 | 11.54384800 |
| H | 18.03698000 | 32.89644700 | 14.71778000 | C  | 19.61547600 | 36.21529800 | 11.22509400 |
| C | 19.67600600 | 33.80062600 | 15.78387300 | C  | 19.58545600 | 35.96933400 | 9.85559500  |
| O | 19.42863100 | 35.01895700 | 15.38694700 | C  | 22.27532600 | 34.09778100 | 12.54287900 |
| O | 20.35568800 | 33.50906700 | 16.77454700 | C  | 23.25525400 | 33.14689900 | 12.25356200 |
| C | 18.43575600 | 31.11140500 | 16.74477400 | C  | 24.09747000 | 32.71392300 | 13.28066300 |
| O | 17.22853500 | 31.42295200 | 16.71102000 | C  | 23.96689300 | 33.22017300 | 14.57697200 |
| N | 19.00865900 | 30.53062900 | 17.80765400 | N  | 20.47790800 | 35.59665800 | 12.04236500 |
| C | 20.44556100 | 30.20638300 | 17.96830700 | N  | 22.11503400 | 34.54228800 | 13.81461900 |
| H | 21.05140700 | 31.09133600 | 17.75637800 | H  | 26.76751400 | 32.47020800 | 14.62769200 |
| H | 20.73158800 | 29.40859000 | 17.27421500 | H  | 24.84992100 | 31.84556700 | 15.97441200 |
| C | 20.54604000 | 29.75962200 | 19.43600100 | H  | 24.63598300 | 33.48659800 | 16.58501100 |
| H | 20.73584500 | 30.62718100 | 20.07954100 | H  | 22.72820000 | 34.50648700 | 15.79390500 |
| H | 21.35759100 | 29.04313500 | 19.59112500 | H  | 18.95180400 | 36.93221900 | 11.69651100 |
| C | 19.15493200 | 29.17764100 | 19.73716500 | H  | 18.87502700 | 36.48995600 | 9.22238100  |
| H | 18.92841200 | 29.13938000 | 20.80618400 | H  | 23.38269000 | 32.76358400 | 11.24511400 |
| H | 19.07738800 | 28.15853200 | 19.34013600 | H  | 24.87376000 | 31.98815400 | 13.05282400 |
| C | 18.20960000 | 30.11965400 | 18.98117700 | N  | 27.73484600 | 34.88155100 | 14.12225800 |
| H | 17.28667600 | 29.64065300 | 18.64255900 | H  | 27.76893700 | 35.80891900 | 13.70706000 |
| N | 16.25075400 | 32.03404600 | 21.28557100 | C  | 28.73899100 | 33.94046000 | 13.62562100 |
| H | 16.44834900 | 32.94871200 | 21.69106100 | H  | 28.81362800 | 33.10520000 | 14.32489500 |
| C | 14.99289500 | 32.09713600 | 20.52796600 | C  | 28.46058400 | 33.42184900 | 12.20090400 |
| H | 14.15065600 | 32.51428900 | 21.10880600 | H  | 29.05097900 | 32.50728800 | 12.04989400 |
| C | 15.18028000 | 32.91235600 | 19.24404500 | H  | 27.40647100 | 33.12417300 | 12.12527000 |
| H | 15.56442800 | 33.91030500 | 19.50889600 | C  | 28.83290800 | 34.38493900 | 11.06413300 |
| H | 15.94591500 | 32.42864300 | 18.62752200 | H  | 29.90784300 | 34.59614700 | 11.10112800 |
| C | 13.87097400 | 33.08194900 | 18.46201500 | H  | 28.64045500 | 33.91255900 | 10.09433000 |
| H | 13.45855900 | 32.09791200 | 18.19754900 | S  | 28.05412100 | 36.05097900 | 11.05550200 |
| H | 13.12246400 | 33.55702500 | 19.10854700 | C  | 26.34863300 | 35.63137700 | 10.55650200 |
| C | 14.00712700 | 33.93814400 | 17.19006500 | H  | 25.80239800 | 36.57557100 | 10.48730400 |
| H | 13.01151300 | 34.28159600 | 16.87315700 | H  | 26.34225000 | 35.14491900 | 9.57605100  |
| H | 14.59475400 | 34.83869300 | 17.42159300 | H  | 25.85086100 | 34.99012100 | 11.29099800 |
| C | 14.65798900 | 33.18410400 | 16.03351500 | Cu | 20.74392700 | 35.99399900 | 14.05795200 |
| H | 15.64498200 | 32.77780100 | 16.27076100 | O  | 19.55464900 | 37.61907400 | 14.07040500 |
| H | 14.02566500 | 32.35768300 | 15.69622600 | N  | 21.89385100 | 37.26347000 | 15.23017600 |
| N | 14.83029100 | 34.10283500 | 14.84471500 | C  | 19.99762100 | 38.61802300 | 14.72475000 |
| H | 15.54926600 | 34.83917500 | 15.00087900 | C  | 19.19943300 | 39.82593100 | 14.83177100 |
| H | 15.19035200 | 33.62275700 | 13.98406400 | C  | 18.05305900 | 39.95096300 | 14.13904200 |
| H | 13.94665900 | 34.56605200 | 14.61127500 | C  | 17.15755700 | 41.14264700 | 14.16801700 |
| C | 25.02720900 | 34.04458300 | 20.54669300 | H  | 17.05520700 | 41.56684600 | 13.16000000 |
| H | 24.57046100 | 33.37907200 | 19.80311500 | H  | 19.53987800 | 40.62986800 | 15.47188700 |
| C | 23.99012500 | 34.95715300 | 21.22403700 | H  | 17.52155700 | 41.92398800 | 14.84046400 |
| H | 23.23229900 | 34.31553400 | 21.68902600 | H  | 16.14464000 | 40.85490400 | 14.48069300 |
| H | 24.47259700 | 35.51619200 | 22.03295800 | H  | 17.75572400 | 39.12944200 | 13.48995300 |
| C | 23.30946600 | 35.97856100 | 20.28285200 | C  | 21.29063500 | 38.46385400 | 15.34035500 |
| H | 22.52432700 | 36.50334300 | 20.83984400 | N  | 22.09972300 | 39.31431600 | 16.06378800 |
| H | 24.04616400 | 36.72051900 | 19.95875000 | C  | 23.20789500 | 38.61063000 | 16.40834300 |

|   |             |             |             |   |             |             |             |
|---|-------------|-------------|-------------|---|-------------|-------------|-------------|
| C | 23.07002100 | 37.33364900 | 15.87517700 | O | 20.29195400 | 29.04362200 | 13.52126900 |
| H | 23.77743600 | 36.52317700 | 15.92377300 | N | 18.35253600 | 30.22573900 | 13.65100900 |
| H | 24.02720000 | 39.02898800 | 16.97200000 | H | 17.38232800 | 30.28048800 | 13.36838400 |
| C | 21.93303600 | 40.74300000 | 16.34733800 | C | 18.74095600 | 31.02702900 | 14.81107500 |
| H | 22.84772600 | 41.09668200 | 16.82237800 | H | 19.77365500 | 30.75545900 | 15.02568300 |
| H | 21.79119200 | 41.29115600 | 15.41368700 | C | 18.65621900 | 32.52182200 | 14.46483200 |
| H | 21.09199800 | 40.90796900 | 17.02501900 | H | 19.28028200 | 32.70959500 | 13.59320200 |
| C | 23.14684900 | 38.80106000 | 11.62817900 | H | 17.62079900 | 32.76379800 | 14.18708200 |
| C | 23.07269400 | 40.20914800 | 11.70149600 | C | 19.03317000 | 33.47538200 | 15.59329200 |
| C | 23.85261000 | 40.92231100 | 12.60575700 | O | 19.56092500 | 34.61061900 | 15.29583100 |
| C | 24.72319100 | 40.22340800 | 13.46368000 | O | 18.74725100 | 33.16453400 | 16.77300500 |
| C | 24.78460400 | 38.80052700 | 13.37136600 | C | 17.78844500 | 30.61374000 | 15.94252300 |
| C | 24.00061900 | 38.08077500 | 12.46000800 | O | 16.58560100 | 30.95332000 | 15.87246200 |
| C | 25.63751300 | 40.60643900 | 14.50371600 | N | 18.24213900 | 29.79171700 | 16.89768900 |
| C | 26.19621300 | 39.44876900 | 14.98896000 | C | 19.64341700 | 29.34457900 | 17.09176500 |
| N | 25.69603500 | 38.35928400 | 14.30630200 | H | 20.30496400 | 30.20989000 | 17.19737200 |
| H | 22.54214100 | 38.27284300 | 10.89481100 | H | 19.97607900 | 28.75938100 | 16.22821800 |
| H | 22.41302900 | 40.74332300 | 11.02294300 | C | 19.57743700 | 28.49882400 | 18.37600700 |
| H | 23.80439600 | 42.00809400 | 12.63674900 | H | 19.77019900 | 29.12974000 | 19.25175700 |
| H | 24.06883600 | 36.99797900 | 12.40034600 | H | 20.31943500 | 27.69621700 | 18.37391200 |
| H | 25.87647700 | 41.61146400 | 14.82421400 | C | 18.12851500 | 27.98416800 | 18.40669300 |
| H | 26.92421400 | 39.30780700 | 15.77570000 | H | 17.80411100 | 27.67213500 | 19.40290200 |
| H | 25.85108800 | 37.38193400 | 14.56186900 | H | 18.01263400 | 27.12801600 | 17.73229600 |
| O | 23.55321800 | 32.20983200 | 9.09115300  | C | 17.32563600 | 29.17684000 | 17.87596400 |
| H | 22.76298200 | 31.80854600 | 8.67836500  | H | 16.38795100 | 28.90929800 | 17.38461000 |
| H | 24.17835100 | 32.35628000 | 8.36442600  | N | 19.48630600 | 34.65373800 | 21.44217400 |
| O | 16.37283000 | 33.50486500 | 12.67964600 | H | 19.52204100 | 35.66904000 | 21.34472100 |
| H | 16.81706800 | 34.34851000 | 12.92449300 | C | 18.08677700 | 34.23595000 | 21.66167800 |
| H | 16.17084800 | 33.54726500 | 11.73278500 | H | 17.59003600 | 34.83219600 | 22.44352600 |
| O | 17.14259000 | 35.61756000 | 14.26297500 | C | 17.26778500 | 34.31186200 | 20.36703000 |
| H | 17.30769900 | 36.56494900 | 14.12926500 | H | 17.37297100 | 35.31477300 | 19.92596500 |
| H | 17.99254300 | 35.31281100 | 14.72467600 | H | 17.70581700 | 33.60700200 | 19.64723300 |
| O | 25.42030300 | 37.24513700 | 17.91822800 | C | 15.77999200 | 34.01894700 | 20.61533600 |
| H | 26.32766200 | 36.91931600 | 18.01705800 | H | 15.67193200 | 33.02345700 | 21.06929800 |
| H | 24.88257200 | 36.42691900 | 17.88833200 | H | 15.41190500 | 34.72897600 | 21.36703400 |
| H | 22.21688800 | 28.16640900 | 9.12907200  | C | 14.84481500 | 34.10945000 | 19.39460700 |
| H | 27.00206100 | 33.07891800 | 16.25782100 | H | 13.81324700 | 34.10535400 | 19.76506800 |
| H | 25.50387800 | 33.41536600 | 21.31103700 | H | 14.97388300 | 35.07044100 | 18.87665700 |
| H | 16.14241000 | 31.39960600 | 22.07551300 | C | 14.94717100 | 32.96940200 | 18.37199400 |
| H | 14.71154400 | 31.06971000 | 20.26555400 | H | 15.18182600 | 32.01568200 | 18.85449400 |
| H | 19.34305700 | 27.43726100 | 13.00916100 | H | 14.00018500 | 32.84383500 | 17.84073200 |
| H | 29.70862600 | 34.45031900 | 13.65527300 | N | 15.97651400 | 33.20041600 | 17.31069300 |
| H | 17.92708800 | 30.98807900 | 19.58818700 | H | 16.93858500 | 33.30863300 | 17.65939100 |
| H | 16.00637200 | 27.21864300 | 15.71088700 | H | 16.05113800 | 32.37525300 | 16.66917500 |

**<sup>2</sup>TS1<sub>ProS,B</sub>**

|   |             |             |             |   |             |             |             |
|---|-------------|-------------|-------------|---|-------------|-------------|-------------|
| C | 22.74430000 | 28.28255900 | 11.37140400 | H | 23.38581300 | 31.62415300 | 17.98693000 |
| H | 22.09214400 | 28.40134300 | 12.24903800 | C | 23.53795600 | 32.62408000 | 19.93952300 |
| H | 23.26833700 | 29.22702400 | 11.17574500 | H | 22.71986400 | 32.02622500 | 20.35894400 |
| C | 21.84507200 | 27.91374900 | 10.22490200 | H | 24.29493500 | 32.71925800 | 20.72632300 |
| O | 21.38814600 | 28.60766800 | 9.36612200  | C | 23.02466600 | 34.04131500 | 19.59943200 |
| C | 18.53386200 | 28.46415100 | 11.96083300 | H | 22.57236600 | 34.47685500 | 20.49723000 |
| H | 17.49740900 | 28.77364500 | 11.78345400 | H | 23.86823300 | 34.67530900 | 19.30771800 |
| C | 18.62461500 | 26.94201700 | 12.18553300 | C | 22.03482700 | 34.04195600 | 18.44458400 |
| H | 18.28955900 | 26.44279200 | 11.26771200 | O | 22.45405600 | 33.98468200 | 17.26683400 |
| H | 19.68035200 | 26.68041500 | 12.31830000 | N | 20.73292400 | 34.06450200 | 18.75582900 |
| C | 17.81497900 | 26.41165600 | 13.38032800 | H | 20.39447800 | 34.14056900 | 19.72344400 |
| H | 18.15910400 | 26.90312400 | 14.30225300 | H | 20.04426900 | 33.92398100 | 18.01239700 |
| C | 16.29578300 | 26.57039200 | 13.24344900 | C | 25.28136100 | 32.57577000 | 18.06395300 |
| H | 15.92959400 | 26.08938000 | 12.32866900 | O | 25.72900800 | 32.36383600 | 16.98064800 |
| H | 15.77550200 | 26.10859000 | 14.08969900 | C | 26.28856300 | 33.92740000 | 13.53650800 |
| H | 15.98820400 | 27.62299200 | 13.20975700 | C | 25.71085800 | 34.98743400 | 14.47176500 |
| C | 19.14863400 | 29.25153700 | 13.11045500 | H | 18.00876300 | 33.74084900 | 8.93181800  |

|    |             |             |             |                                         |             |             |             |
|----|-------------|-------------|-------------|-----------------------------------------|-------------|-------------|-------------|
| H  | 20.18066300 | 32.72269700 | 9.59095500  | C                                       | 19.13672000 | 41.23001000 | 17.33963000 |
| O  | 24.58208900 | 35.46747200 | 14.24715700 | C                                       | 18.48572200 | 40.14123000 | 17.95908600 |
| C  | 25.49281800 | 32.58503200 | 13.52705300 | C                                       | 17.45124500 | 40.29647700 | 18.87888000 |
| C  | 18.49781800 | 34.05446400 | 9.84951400  | C                                       | 20.10040300 | 40.66693600 | 16.38174200 |
| C  | 23.04797100 | 33.17864900 | 13.70879600 | C                                       | 20.08135300 | 39.26532900 | 16.63847300 |
| C  | 19.71556900 | 33.48243300 | 10.21602400 | N                                       | 19.10547200 | 38.96701100 | 17.49937900 |
| C  | 20.32704300 | 33.89677400 | 11.40613900 | H                                       | 16.28405400 | 41.77084600 | 19.91635200 |
| C  | 18.58192500 | 35.39417700 | 11.83098400 | H                                       | 17.43766900 | 43.70781200 | 18.90813600 |
| C  | 17.91689900 | 35.02694600 | 10.66439100 | H                                       | 19.25965600 | 43.39389400 | 17.25876000 |
| C  | 21.63073600 | 33.35977500 | 11.88265700 | H                                       | 16.96270400 | 39.44234400 | 19.33825500 |
| C  | 22.58552200 | 32.78191400 | 11.03982300 | H                                       | 21.00585100 | 41.18343500 | 16.08684800 |
| C  | 23.84346600 | 32.48661500 | 11.57509300 | H                                       | 20.64227200 | 38.47892700 | 16.15375600 |
| C  | 24.11461900 | 32.71449300 | 12.92749900 | H                                       | 18.71495200 | 38.01896800 | 17.52550700 |
| N  | 19.74643800 | 34.83790300 | 12.19152500 | O                                       | 21.39716100 | 31.35683300 | 8.42477700  |
| N  | 21.86771300 | 33.52830200 | 13.20050000 | H                                       | 21.40447800 | 30.43228000 | 8.73751900  |
| H  | 26.28171500 | 34.35541800 | 12.52731900 | H                                       | 21.41858100 | 31.29153000 | 7.45822400  |
| H  | 26.08126300 | 31.86434100 | 12.94837000 | O                                       | 15.76673500 | 35.51216400 | 15.83733100 |
| H  | 25.43026900 | 32.20242700 | 14.55100800 | H                                       | 16.59617700 | 36.04460100 | 15.96887100 |
| H  | 23.16388000 | 33.31163500 | 14.77965700 | H                                       | 15.03258200 | 36.14182800 | 15.79222600 |
| H  | 18.20384900 | 36.16409900 | 12.49595300 | O                                       | 18.17465700 | 36.70810500 | 16.23362500 |
| H  | 16.97452000 | 35.49740700 | 10.40481400 | H                                       | 18.47534500 | 37.22333700 | 15.44550600 |
| H  | 22.37526900 | 32.58725800 | 9.99220500  | H                                       | 18.74014600 | 35.89837800 | 16.14809200 |
| H  | 24.62276600 | 32.09967500 | 10.92207900 | O                                       | 22.05370700 | 35.88643100 | 15.40230900 |
| N  | 26.45029000 | 35.40364500 | 15.51891800 | H                                       | 22.98001800 | 35.89457600 | 15.05264800 |
| H  | 25.98666000 | 36.07647200 | 16.12743100 | H                                       | 22.04901700 | 35.17072400 | 16.09705400 |
| C  | 27.75653200 | 34.90425900 | 15.96753500 | H                                       | 23.45392300 | 27.47668100 | 11.57416700 |
| H  | 28.46837900 | 34.94779800 | 15.13566400 | H                                       | 27.32729400 | 33.69939100 | 13.78419700 |
| C  | 28.32656900 | 35.73315700 | 17.12533500 | H                                       | 24.55633000 | 30.90057400 | 19.10261100 |
| H  | 29.33186400 | 35.33844700 | 17.32103600 | H                                       | 20.03403200 | 34.44267900 | 22.27599300 |
| H  | 28.46554500 | 36.77360600 | 16.80639600 | H                                       | 18.10259400 | 33.20021300 | 22.01996600 |
| C  | 27.53498900 | 35.67529200 | 18.44266100 | H                                       | 19.09882400 | 28.72315800 | 11.05677200 |
| H  | 27.16043400 | 34.66219600 | 18.62625000 | H                                       | 27.66459800 | 33.85731100 | 16.27942300 |
| H  | 28.18173100 | 35.93986400 | 19.28554500 | H                                       | 17.09598100 | 29.89417100 | 18.67727900 |
| S  | 26.04509400 | 36.75928900 | 18.53519100 | H                                       | 18.05119300 | 25.34729000 | 13.50321600 |
| C  | 26.83123200 | 38.38741300 | 18.80974400 |                                         |             |             |             |
| H  | 26.02613800 | 39.12374100 | 18.87371100 |                                         |             |             |             |
| H  | 27.38982400 | 38.39145500 | 19.75002500 | <b><sup>2</sup>TS1<sub>ProR,B</sub></b> |             |             |             |
| H  | 27.49344200 | 38.66261000 | 17.98428100 | C                                       | 20.13194100 | 27.84456200 | 10.88377000 |
| Cu | 20.77845300 | 35.44694600 | 13.89268800 | H                                       | 19.37855200 | 28.06453300 | 11.65268600 |
| O  | 19.56928800 | 37.67850000 | 14.05157500 | H                                       | 21.07500600 | 27.52883800 | 11.34767100 |
| N  | 21.79164400 | 36.79023800 | 12.69453000 | C                                       | 20.31564900 | 29.08426100 | 10.05820600 |
| C  | 20.27223400 | 38.57012500 | 13.45072800 | O                                       | 21.26904700 | 29.79758500 | 9.94448200  |
| C  | 20.19836700 | 39.94954100 | 13.65230000 | C                                       | 15.61703600 | 28.69986500 | 12.80124300 |
| C  | 19.28372500 | 40.58215300 | 14.54861500 | H                                       | 14.69807900 | 29.19154900 | 13.14103200 |
| C  | 18.97291000 | 42.04256600 | 14.28580800 | C                                       | 15.58729300 | 27.19194000 | 13.11596000 |
| H  | 18.38953300 | 42.10556700 | 13.35811600 | H                                       | 14.76543900 | 26.73907300 | 12.54691600 |
| H  | 20.93620800 | 40.58527800 | 13.17716300 | H                                       | 16.51652400 | 26.75175300 | 12.73758900 |
| H  | 19.88460800 | 42.63260000 | 14.14091800 | C                                       | 15.42900200 | 26.84396800 | 14.60526800 |
| H  | 18.37825600 | 42.49578800 | 15.08049700 | H                                       | 16.26539700 | 27.27610800 | 15.17338700 |
| H  | 18.40971400 | 39.98901600 | 14.81396000 | C                                       | 14.09801300 | 27.28561300 | 15.22637100 |
| C  | 21.31456000 | 38.02757400 | 12.53193200 | H                                       | 13.24660700 | 26.87016700 | 14.67383400 |
| N  | 21.97035600 | 38.63189100 | 11.49365600 | H                                       | 14.01689700 | 26.94351200 | 16.26389200 |
| C  | 22.90450100 | 37.73546900 | 11.01628100 | H                                       | 13.98618600 | 28.37699200 | 15.23549000 |
| C  | 22.78679800 | 36.60121800 | 11.77325800 | C                                       | 16.85041000 | 29.38022600 | 13.38083900 |
| H  | 23.36411200 | 35.69207500 | 11.73688300 | O                                       | 17.98992100 | 28.96161400 | 13.16883500 |
| H  | 23.55403300 | 37.98326400 | 10.19023500 | N                                       | 16.61718200 | 30.49523200 | 14.13785800 |
| C  | 21.72123200 | 39.93591700 | 10.87773000 | H                                       | 15.66380500 | 30.75136000 | 14.35716300 |
| H  | 21.99791400 | 39.87661700 | 9.82344900  | C                                       | 17.68414200 | 31.25943800 | 14.78141800 |
| H  | 20.66289300 | 40.18460100 | 10.95701400 | H                                       | 18.61559400 | 30.82405100 | 14.42710900 |
| H  | 22.31660600 | 40.71831700 | 11.35789100 | C                                       | 17.61673300 | 32.73173400 | 14.37623400 |
| C  | 17.08132900 | 41.60213400 | 19.19913000 | H                                       | 17.61787900 | 32.80270500 | 13.28137100 |
| C  | 17.73485400 | 42.70393300 | 18.62085900 | H                                       | 16.67454600 | 33.17488400 | 14.71304500 |
| C  | 18.76027800 | 42.53161500 | 17.69058400 | C                                       | 18.80179800 | 33.54955900 | 14.88943900 |

|   |             |             |             |    |             |             |             |
|---|-------------|-------------|-------------|----|-------------|-------------|-------------|
| O | 18.77041100 | 34.81660800 | 14.58403900 | C  | 22.80256300 | 33.92308500 | 12.99288800 |
| O | 19.73805500 | 33.00222100 | 15.48329700 | C  | 23.99450500 | 33.22095400 | 12.80113800 |
| C | 17.52775400 | 31.10191700 | 16.30495000 | C  | 25.05722700 | 33.45879200 | 13.67500400 |
| O | 16.66470300 | 31.76993800 | 16.90181000 | C  | 24.92958200 | 34.37899400 | 14.71777700 |
| N | 18.27321200 | 30.16676800 | 16.92049000 | N  | 20.58656500 | 34.62686800 | 12.41506100 |
| C | 19.41765100 | 29.42064600 | 16.34424400 | N  | 22.65555700 | 34.76744300 | 14.03992900 |
| H | 20.13452400 | 30.11698900 | 15.90015500 | H  | 27.71736800 | 34.62089300 | 14.27442200 |
| H | 19.07505300 | 28.73320600 | 15.56397300 | H  | 26.33445200 | 33.78649300 | 16.21679800 |
| C | 20.00234600 | 28.67576700 | 17.55629100 | H  | 25.66471000 | 35.38515600 | 16.44622700 |
| H | 20.75612200 | 29.30360600 | 18.04597300 | H  | 23.49464400 | 35.66419100 | 15.69619900 |
| H | 20.48080600 | 27.73568500 | 17.26869500 | H  | 18.70333400 | 35.32380600 | 11.96667700 |
| C | 18.79354300 | 28.48458200 | 18.48690200 | H  | 18.53092400 | 34.02836400 | 9.82142900  |
| H | 19.07577200 | 28.28887700 | 19.52538000 | H  | 24.09746000 | 32.49530200 | 11.99926400 |
| H | 18.17656200 | 27.64561900 | 18.14419400 | H  | 25.98942700 | 32.91756000 | 13.53177300 |
| C | 18.02660400 | 29.80273200 | 18.32701700 | N  | 28.25142700 | 37.34575000 | 14.08402900 |
| H | 16.95116600 | 29.72169600 | 18.50437300 | H  | 28.10642100 | 38.29159500 | 13.73235300 |
| N | 19.10239800 | 32.52087900 | 20.85842700 | C  | 29.64404900 | 36.94964900 | 14.31456800 |
| H | 19.60559100 | 33.33733900 | 21.20846100 | H  | 29.77146500 | 35.90004200 | 14.02958300 |
| C | 17.65235500 | 32.80926000 | 20.90977400 | C  | 30.63032800 | 37.80253200 | 13.50573800 |
| H | 17.34659500 | 33.21528500 | 21.88749200 | H  | 31.62273500 | 37.35758900 | 13.65387200 |
| C | 17.24882400 | 33.77504900 | 19.79303700 | H  | 30.40965800 | 37.70861900 | 12.43544300 |
| H | 17.93267300 | 34.63768400 | 19.79590600 | C  | 30.72146100 | 39.28350000 | 13.90907700 |
| H | 17.37277200 | 33.26656800 | 18.83024700 | H  | 30.74584900 | 39.38541100 | 14.99984300 |
| C | 15.81013400 | 34.28669100 | 19.95651600 | H  | 31.65119600 | 39.71983600 | 13.53005100 |
| H | 15.11782400 | 33.43900900 | 20.05637000 | S  | 29.34133100 | 40.37545700 | 13.35311200 |
| H | 15.73192200 | 34.85254900 | 20.89275600 | C  | 29.76317700 | 40.57819200 | 11.58515300 |
| C | 15.34484200 | 35.19334600 | 18.80079000 | H  | 29.00370300 | 41.23371700 | 11.15165700 |
| H | 14.50479900 | 35.81682000 | 19.13747600 | H  | 30.74089500 | 41.05653200 | 11.47986900 |
| H | 16.15939900 | 35.88013200 | 18.52849800 | H  | 29.75523700 | 39.62602600 | 11.04759200 |
| C | 14.90831800 | 34.39908200 | 17.57029000 | Cu | 20.69440300 | 35.56092700 | 14.19779900 |
| H | 15.66212200 | 33.69016100 | 17.21705600 | O  | 20.64933700 | 37.62061700 | 13.54480600 |
| H | 13.99184600 | 33.83667900 | 17.77025200 | N  | 20.91338300 | 36.50199200 | 15.91702900 |
| N | 14.60182600 | 35.32951600 | 16.42131700 | C  | 21.07586300 | 38.42642400 | 14.45136600 |
| H | 15.45095800 | 35.81173800 | 16.05128900 | C  | 21.48085000 | 39.74190700 | 14.24940200 |
| H | 14.24909400 | 34.83515500 | 15.56439900 | C  | 21.40011900 | 40.43156400 | 12.99177400 |
| H | 13.91840300 | 36.04230500 | 16.69387100 | C  | 21.16768600 | 41.93361200 | 13.07735400 |
| C | 24.98002300 | 31.75099900 | 19.33555200 | H  | 21.14089300 | 42.41342400 | 12.09454600 |
| H | 24.78845200 | 31.72422400 | 18.25723000 | H  | 21.90418000 | 40.28933600 | 15.08362000 |
| C | 23.68817400 | 31.63334200 | 20.15718600 | H  | 21.93404200 | 42.43072700 | 13.68368100 |
| H | 23.20710300 | 30.67830300 | 19.91387300 | H  | 20.20108000 | 42.11533200 | 13.56281500 |
| H | 23.94638100 | 31.59676800 | 21.22167300 | H  | 20.76455900 | 39.92428500 | 12.26730600 |
| C | 22.67969100 | 32.78762600 | 19.95533000 | C  | 21.10618600 | 37.82102100 | 15.81803200 |
| H | 21.84339700 | 32.64395500 | 20.64666900 | N  | 21.25390200 | 38.33875100 | 17.07512200 |
| H | 23.16223400 | 33.74087400 | 20.20554800 | C  | 21.15445200 | 37.29225200 | 17.97082500 |
| C | 22.18310600 | 32.91007600 | 18.51989100 | C  | 20.93903600 | 36.15626200 | 17.23857100 |
| O | 22.95018300 | 33.29071000 | 17.61850800 | H  | 20.81741800 | 35.13537400 | 17.56167700 |
| N | 20.89656300 | 32.57865600 | 18.28398000 | H  | 21.28128100 | 37.44668600 | 19.03099400 |
| H | 20.23784500 | 32.40342200 | 19.04835200 | C  | 21.45418800 | 39.72781600 | 17.48052000 |
| H | 20.54026600 | 32.67730000 | 17.33280400 | H  | 21.27958400 | 39.79892500 | 18.55497000 |
| C | 25.75629500 | 33.02006100 | 19.65283500 | H  | 22.47698800 | 40.05193000 | 17.26882600 |
| O | 26.44468900 | 33.66589300 | 18.92433200 | H  | 20.74814100 | 40.37730800 | 16.95957300 |
| C | 27.32163700 | 35.28750500 | 15.05424100 | C  | 23.36550400 | 36.46912700 | 10.20246900 |
| C | 27.13975500 | 36.67377900 | 14.44600900 | C  | 22.46135200 | 37.32932700 | 9.55574000  |
| H | 20.44160100 | 32.50376400 | 9.20573300  | C  | 22.24737000 | 38.63207900 | 10.00952800 |
| H | 22.44397200 | 32.42478700 | 10.65644700 | C  | 22.96731800 | 39.07228100 | 11.12153800 |
| O | 26.00347100 | 37.15456500 | 14.27507100 | C  | 23.87162500 | 38.19362200 | 11.74565400 |
| C | 26.04615100 | 34.70096500 | 15.68415400 | C  | 24.08842800 | 36.88725200 | 11.31946800 |
| C | 20.48349500 | 33.12040100 | 10.09799100 | C  | 23.00451700 | 40.33826000 | 11.87405400 |
| C | 23.67412100 | 34.98471200 | 14.87089500 | C  | 24.09404300 | 40.16280900 | 12.79205600 |
| C | 21.61014100 | 33.07085500 | 10.91519600 | N  | 24.51127900 | 38.90615000 | 12.77705800 |
| C | 21.64190100 | 33.85088000 | 12.07721800 | H  | 23.51315700 | 35.46494400 | 9.81735200  |
| C | 19.50952400 | 34.68677800 | 11.62068500 | H  | 21.92871000 | 36.97661700 | 8.67737200  |
| C | 19.41755700 | 33.95379800 | 10.44204700 | H  | 21.55214300 | 39.28906600 | 9.49447600  |

|   |             |             |             |   |             |             |             |
|---|-------------|-------------|-------------|---|-------------|-------------|-------------|
| H | 24.79424800 | 36.23872900 | 11.82655300 | H | 20.88070700 | 29.32871700 | 18.09315900 |
| H | 22.88196400 | 41.29014300 | 11.36862600 | H | 20.65960500 | 27.74597200 | 17.32929600 |
| H | 24.48651900 | 40.87112700 | 13.51056000 | C | 18.94159200 | 28.45308200 | 18.52990500 |
| H | 25.19939800 | 38.45720700 | 13.41047400 | H | 19.22300500 | 28.27639300 | 19.57200100 |
| O | 23.93193900 | 30.81344400 | 10.49472400 | H | 18.35347200 | 27.59188300 | 18.19153400 |
| H | 23.13284800 | 30.25755800 | 10.43986400 | C | 18.13502200 | 29.74469000 | 18.35166000 |
| H | 24.34233800 | 30.72889300 | 9.62048400  | H | 17.06183900 | 29.63250100 | 18.52606000 |
| O | 14.44906800 | 34.42355700 | 13.86862600 | N | 19.11183300 | 32.53598300 | 20.90562400 |
| H | 15.17608400 | 35.06931400 | 13.72042400 | H | 19.57305800 | 33.36058100 | 21.29245500 |
| H | 13.80419700 | 34.54813500 | 13.15569400 | C | 17.65220700 | 32.77724500 | 20.90035100 |
| O | 16.50642700 | 36.13798100 | 14.54409200 | H | 17.29504800 | 33.16641400 | 21.86751900 |
| H | 16.73885100 | 37.03643400 | 14.26072500 | C | 17.26110200 | 33.73715900 | 19.77400400 |
| H | 17.37944200 | 35.62530800 | 14.54575400 | H | 17.92451100 | 34.61518400 | 19.79984100 |
| O | 24.14472800 | 35.74640500 | 18.38394300 | H | 17.42569600 | 33.23483000 | 18.81404800 |
| H | 25.02524900 | 35.54566600 | 18.73732200 | C | 15.80653400 | 34.21442600 | 19.89583700 |
| H | 23.81405300 | 34.87616600 | 18.07764700 | H | 15.13173600 | 33.35024400 | 19.97151900 |
| H | 19.73187300 | 27.04595600 | 10.25056700 | H | 15.68745600 | 34.77367400 | 20.83185500 |
| H | 28.10146200 | 35.33189800 | 15.82395500 | C | 15.35473200 | 35.11586400 | 18.73094800 |
| H | 25.65302800 | 30.92019700 | 19.59017700 | H | 14.49444800 | 35.72235300 | 19.04718400 |
| H | 19.31700000 | 31.77224400 | 21.51738600 | H | 16.16300900 | 35.81863700 | 18.48181300 |
| H | 17.11876100 | 31.86114700 | 20.77971600 | C | 14.96528500 | 34.31856600 | 17.48671100 |
| H | 15.66443600 | 28.83528200 | 11.71303200 | H | 15.74048800 | 33.62357700 | 17.15229500 |
| H | 29.88945900 | 37.02796000 | 15.38403700 | H | 14.05419500 | 33.73896800 | 17.66051200 |
| H | 18.42219200 | 30.58046500 | 18.99309200 | N | 14.67258700 | 35.24968200 | 16.33504700 |
| H | 15.52607600 | 25.75615900 | 14.71088500 | H | 15.52413400 | 35.74624700 | 15.98557700 |

## <sup>2</sup>Int1<sub>Pros,B</sub>

|   |             |             |             |   |             |             |             |
|---|-------------|-------------|-------------|---|-------------|-------------|-------------|
| C | 20.02348100 | 27.96307000 | 10.59850400 | C | 25.04167700 | 31.97274900 | 19.49472000 |
| H | 19.34878700 | 28.10659600 | 11.45439500 | H | 24.85024000 | 31.89958300 | 18.41860500 |
| H | 21.01854300 | 27.65405500 | 10.94302800 | C | 23.75269600 | 31.86001500 | 20.32138000 |
| C | 20.08018400 | 29.26353900 | 9.85361200  | H | 23.28638400 | 30.89095600 | 20.10672700 |
| O | 20.98100700 | 30.04136400 | 9.73003700  | H | 24.01214700 | 31.85876200 | 21.38622200 |
| C | 15.75603400 | 28.66694100 | 12.75934800 | C | 22.72634300 | 32.99185300 | 20.08657000 |
| H | 14.83254000 | 29.15107500 | 13.09756700 | H | 21.88514700 | 32.84767900 | 20.77224000 |
| C | 15.73911100 | 27.15930200 | 13.07975500 | H | 23.19148800 | 33.95652400 | 20.32617600 |
| H | 14.92116500 | 26.69735300 | 12.51230300 | C | 22.24418800 | 33.08000800 | 18.64309900 |
| H | 16.67199500 | 26.72522600 | 12.70302300 | O | 23.01565600 | 33.46728000 | 17.74718100 |
| C | 15.58358500 | 26.81522200 | 14.57035800 | N | 20.97202900 | 32.71265900 | 18.39521100 |
| H | 16.41162700 | 27.26307500 | 15.13854100 | H | 20.31471700 | 32.50067000 | 19.15178200 |
| C | 14.24450100 | 27.23862600 | 15.18667700 | H | 20.62656600 | 32.77734600 | 17.43549200 |
| H | 13.40107000 | 26.80404100 | 14.63666800 | C | 25.79379500 | 33.26810000 | 19.75897900 |
| H | 14.16831900 | 26.90383400 | 16.22695700 | O | 26.48223800 | 33.88741400 | 19.00740700 |
| H | 14.11364800 | 28.32796000 | 15.18664800 | C | 27.28395900 | 35.04213500 | 15.01984900 |
| C | 16.98308100 | 29.35815500 | 13.33893000 | C | 27.12900000 | 36.42491500 | 14.39896100 |
| O | 18.12855400 | 28.97457400 | 13.09321100 | H | 20.16783400 | 32.81783600 | 9.22649100  |
| N | 16.73875600 | 30.43862300 | 14.13977500 | H | 22.19893600 | 32.60658000 | 10.62079800 |
| H | 15.78401300 | 30.67176100 | 14.37797600 | O | 25.99639400 | 36.89423700 | 14.16695000 |
| C | 17.80079800 | 31.19399700 | 14.80133100 | C | 25.99871400 | 34.48552800 | 15.65912600 |
| H | 18.73406800 | 30.75732300 | 14.45434200 | C | 20.26173800 | 33.40927600 | 10.13187500 |
| C | 17.75082600 | 32.67190900 | 14.41476400 | C | 23.62719400 | 34.90413800 | 14.91723000 |
| H | 17.81537700 | 32.76266100 | 13.32313200 | C | 21.40330900 | 33.28267700 | 10.91886500 |
| H | 16.78933900 | 33.10738500 | 14.70358100 | C | 21.50073300 | 34.02503900 | 12.10264700 |
| C | 18.90189100 | 33.47875800 | 15.01988100 | C | 19.40803600 | 34.98501200 | 11.71539900 |
| O | 18.85287300 | 34.76130500 | 14.80231200 | N | 19.24683700 | 34.28425900 | 10.52470700 |
| O | 19.81850900 | 32.90234300 | 15.61677700 | C | 22.67759900 | 33.99127000 | 13.00215400 |
| C | 17.62396800 | 31.02431400 | 16.32077700 | C | 23.82852700 | 33.24008500 | 12.75163200 |
| O | 16.74058100 | 31.67435600 | 16.90849200 | C | 24.91487800 | 33.37721900 | 13.61839800 |
| N | 18.37742900 | 30.10016000 | 16.94306100 | C | 24.84886900 | 34.24748500 | 14.70796500 |
| C | 19.55046900 | 29.38892600 | 16.38214100 | N | 20.49863700 | 34.85104200 | 12.48109300 |
| H | 20.24578800 | 30.10670200 | 15.93867400 | N | 22.58677400 | 34.78228600 | 14.09530400 |
| H | 19.23661400 | 28.68318900 | 15.60536100 | H | 27.65983500 | 34.36412000 | 14.23955500 |
| C | 20.14990400 | 28.67317700 | 17.60472200 | H | 26.26409200 | 33.54312700 | 16.15383600 |
|   |             |             |             | H | 25.66398400 | 35.15943100 | 16.45166200 |

|    |             |             |             |                               |             |             |             |
|----|-------------|-------------|-------------|-------------------------------|-------------|-------------|-------------|
| H  | 23.49753600 | 35.55339100 | 15.77610900 | H                             | 13.98015400 | 34.51643000 | 13.03421000 |
| H  | 18.64584100 | 35.65837900 | 12.09271000 | O                             | 16.63197500 | 36.08559500 | 14.54242800 |
| H  | 18.34870800 | 34.41631300 | 9.93079300  | H                             | 16.91271900 | 36.98536700 | 14.31152700 |
| H  | 23.88501000 | 32.55597800 | 11.90967500 | H                             | 17.49274900 | 35.54918100 | 14.62414400 |
| H  | 25.81744700 | 32.80053400 | 13.42941600 | O                             | 24.22823200 | 35.95583600 | 18.29357400 |
| N  | 28.24867600 | 37.10423200 | 14.08815400 | H                             | 25.09899300 | 35.76876700 | 18.67740400 |
| H  | 28.11461100 | 38.04432100 | 13.71633700 | H                             | 23.86133500 | 35.06552400 | 18.10944600 |
| C  | 29.63347000 | 36.71497500 | 14.37814400 | H                             | 19.58443400 | 27.19420100 | 9.95505900  |
| H  | 29.77863400 | 35.66715700 | 14.09576200 | H                             | 28.06801200 | 35.07256200 | 15.78526800 |
| C  | 30.64863200 | 37.57612900 | 13.61560600 | H                             | 25.73168300 | 31.16635100 | 19.78069000 |
| H  | 31.63652400 | 37.14002200 | 13.81174800 | H                             | 19.32309200 | 31.78091100 | 21.55817700 |
| H  | 30.47989500 | 37.47863200 | 12.53621000 | H                             | 17.15529300 | 31.81339800 | 20.74391400 |
| C  | 30.70573300 | 39.05856600 | 14.01972900 | H                             | 15.80344400 | 28.79872300 | 11.67098800 |
| H  | 30.66956700 | 39.16389000 | 15.10979700 | H                             | 29.82899100 | 36.79215900 | 15.45751100 |
| H  | 31.65066500 | 39.50236400 | 13.69053400 | H                             | 18.50394800 | 30.54223500 | 19.01010100 |
| S  | 29.34837400 | 40.13508100 | 13.38285900 | H                             | 15.69747100 | 25.72954100 | 14.68096500 |
| C  | 29.87806500 | 40.35043500 | 11.64546400 |                               |             |             |             |
| H  | 29.13558000 | 40.99221900 | 11.16453800 | <b><sup>2</sup>Int1ProR,B</b> |             |             |             |
| H  | 30.85088400 | 40.84804900 | 11.60424900 | C                             | 22.69491100 | 28.27922900 | 11.34712600 |
| H  | 29.92393300 | 39.39936900 | 11.10785000 | H                             | 22.02718100 | 28.39933500 | 12.21289300 |
| Cu | 20.66504100 | 35.73430500 | 14.29559600 | H                             | 23.22428200 | 29.22309700 | 11.16350400 |
| O  | 20.58236000 | 37.69093500 | 13.62634900 | C                             | 21.81587900 | 27.91663200 | 10.18311600 |
| N  | 20.88089600 | 36.66380200 | 16.02368500 | O                             | 21.36368200 | 28.61877400 | 9.32832400  |
| C  | 20.97767400 | 38.55645900 | 14.52790600 | C                             | 18.49033700 | 28.61216800 | 11.88459400 |
| C  | 21.39852900 | 39.83093600 | 14.25804800 | H                             | 17.48571700 | 28.99561000 | 11.67271800 |
| C  | 21.41803700 | 40.41754900 | 12.86115700 | C                             | 18.46429100 | 27.08545700 | 12.09833700 |
| C  | 21.11335000 | 41.92236500 | 12.87904300 | H                             | 18.12131100 | 26.61871800 | 11.16646100 |
| H  | 21.09803600 | 42.34615700 | 11.86839600 | H                             | 19.49404200 | 26.74688200 | 12.25934600 |
| H  | 21.69879300 | 40.48678100 | 15.06760800 | C                             | 17.58370600 | 26.60613100 | 13.26417300 |
| H  | 21.85841800 | 42.47742400 | 13.46399500 | H                             | 17.94766000 | 27.04780600 | 14.20358200 |
| H  | 20.13521500 | 42.10273000 | 13.33665400 | C                             | 16.08750700 | 26.90033500 | 13.09916200 |
| H  | 20.66147700 | 39.90356000 | 12.25964300 | H                             | 15.70232600 | 26.47836500 | 12.16322000 |
| C  | 20.98464200 | 37.99080700 | 15.90273100 | H                             | 15.50921700 | 26.46353100 | 13.92060500 |
| N  | 21.05172100 | 38.54644100 | 17.14727500 | H                             | 15.87404800 | 27.97640800 | 13.08997000 |
| C  | 20.99283900 | 37.51380000 | 18.06745900 | C                             | 19.11711700 | 29.34417600 | 13.06333400 |
| C  | 20.88213100 | 36.35037900 | 17.35674500 | O                             | 20.24421100 | 29.07786400 | 13.48554300 |
| H  | 20.81353700 | 35.33108400 | 17.70185000 | N                             | 18.35178000 | 30.33452700 | 13.61860900 |
| H  | 21.06169700 | 37.70318200 | 19.12759400 | H                             | 17.38636200 | 30.42678400 | 13.32956800 |
| C  | 21.13694400 | 39.95821800 | 17.50532700 | C                             | 18.75351000 | 31.08924800 | 14.80530700 |
| H  | 20.86225100 | 40.06674500 | 18.55572700 | H                             | 19.79049400 | 30.81468600 | 14.99363400 |
| H  | 22.15424600 | 40.33637500 | 17.36641700 | C                             | 18.65477100 | 32.59535700 | 14.51848700 |
| H  | 20.44545900 | 40.53930700 | 16.89189500 | H                             | 19.24797500 | 32.81815400 | 13.63448600 |
| C  | 23.43931500 | 36.60188700 | 9.81783300  | H                             | 17.60983000 | 32.84499500 | 14.28646400 |
| C  | 22.46834400 | 37.49028200 | 9.33916100  | C                             | 19.07108600 | 33.50661300 | 15.66749500 |
| C  | 22.16541300 | 38.67798900 | 10.02028700 | O                             | 19.61267600 | 34.64034000 | 15.39291400 |
| C  | 22.85339800 | 38.95861800 | 11.19295500 | O                             | 18.80519800 | 33.16185500 | 16.84310700 |
| C  | 23.82108900 | 38.05509700 | 11.64459700 | C                             | 17.82115300 | 30.62809800 | 15.93539800 |
| C  | 24.14357600 | 36.87234800 | 10.99602500 | O                             | 16.61653700 | 30.96794700 | 15.90078500 |
| C  | 22.80366300 | 40.13050800 | 12.15183200 | N                             | 18.29147900 | 29.77001300 | 16.84978400 |
| C  | 23.84592900 | 39.71865600 | 13.15495500 | C                             | 19.69712100 | 29.32121100 | 17.00778600 |
| N  | 24.38922000 | 38.58274800 | 12.83858300 | H                             | 20.35735900 | 30.18504900 | 17.13185500 |
| H  | 23.65335100 | 35.69256100 | 9.26510400  | H                             | 20.01744400 | 28.76644000 | 16.12017300 |
| H  | 21.94273600 | 37.25773000 | 8.41791100  | C                             | 19.65271400 | 28.43438900 | 18.26482700 |
| H  | 21.41180100 | 39.35701400 | 9.63245000  | H                             | 19.85477000 | 29.03763900 | 19.15784000 |
| H  | 24.89554300 | 36.19608500 | 11.38807600 | H                             | 20.39803800 | 27.63577100 | 18.22655500 |
| H  | 23.15316800 | 41.04470600 | 11.64503000 | C                             | 18.20662300 | 27.91209300 | 18.29889700 |
| H  | 24.17366800 | 40.27266600 | 14.02478500 | H                             | 17.89732500 | 27.56645300 | 19.28883000 |
| H  | 25.12093000 | 38.06763100 | 13.38940300 | H                             | 18.08515300 | 27.07752700 | 17.59887600 |
| O  | 23.65795500 | 30.97313600 | 10.31051900 | C                             | 17.39098400 | 29.11742900 | 17.81830500 |
| H  | 22.83916300 | 30.44907700 | 10.23074200 | H                             | 16.44832300 | 28.86112500 | 17.33044100 |
| H  | 24.05696600 | 30.92682300 | 9.42823400  | N                             | 19.60058400 | 34.43210100 | 21.58026200 |
| O  | 14.60246800 | 34.38117800 | 13.76485900 | H                             | 19.63995400 | 35.45128100 | 21.54517000 |
| H  | 15.33115900 | 35.03168700 | 13.65093100 | C                             | 18.20237200 | 34.00726200 | 21.79489500 |

|   |             |             |             |    |             |             |             |
|---|-------------|-------------|-------------|----|-------------|-------------|-------------|
| H | 17.71625400 | 34.56430300 | 22.61163500 | H  | 29.39375200 | 35.28180700 | 17.38081400 |
| C | 17.36987500 | 34.15003800 | 20.51469200 | H  | 28.53157100 | 36.72561100 | 16.88395500 |
| H | 17.47755600 | 35.17198900 | 20.12051500 | C  | 27.60462600 | 35.61774500 | 18.51589800 |
| H | 17.79588700 | 33.47763500 | 19.75771900 | H  | 27.22015700 | 34.60664300 | 18.68953600 |
| C | 15.88270500 | 33.85584700 | 20.76346300 | H  | 28.25880400 | 35.86492800 | 19.35834000 |
| H | 15.77227200 | 32.84391700 | 21.17894800 | S  | 26.12801400 | 36.71783500 | 18.63001800 |
| H | 15.52456000 | 34.53783800 | 21.54542100 | C  | 26.93594100 | 38.33235700 | 18.92099300 |
| C | 14.93964900 | 33.99870200 | 19.55382800 | H  | 26.14077200 | 39.07824300 | 18.99756400 |
| H | 13.91070000 | 33.98757000 | 19.93138500 | H  | 27.49913800 | 38.31799800 | 19.85845400 |
| H | 15.07171300 | 34.97678600 | 19.06976400 | H  | 27.59766700 | 38.60921900 | 18.09570800 |
| C | 15.02717300 | 32.89628300 | 18.48943200 | Cu | 20.80019700 | 35.51096800 | 13.97874100 |
| H | 15.26267400 | 31.92439600 | 18.93374600 | O  | 19.58069600 | 37.68015700 | 14.08498900 |
| H | 14.07431700 | 32.79386700 | 17.96367600 | N  | 21.84048200 | 36.80331200 | 12.77723700 |
| N | 16.04641400 | 33.16119000 | 17.42624700 | C  | 20.26507800 | 38.57919500 | 13.42457100 |
| H | 17.01425800 | 33.24967000 | 17.76507900 | C  | 20.15881200 | 39.94212400 | 13.55230600 |
| H | 16.10716700 | 32.36088800 | 16.75185300 | C  | 19.18509300 | 40.63074800 | 14.44197800 |
| H | 15.85010900 | 34.05020400 | 16.90338800 | C  | 18.80556200 | 42.02092000 | 13.91578800 |
| C | 24.18928000 | 31.77810900 | 18.78418900 | H  | 18.38200900 | 41.91813300 | 12.91157200 |
| H | 23.44987300 | 31.59096700 | 17.99600400 | H  | 20.87457500 | 40.57991800 | 13.04707600 |
| C | 23.59009600 | 32.52467600 | 19.98187100 | H  | 19.68390900 | 42.67359600 | 13.84229700 |
| H | 22.75873000 | 31.92849700 | 20.37698400 | H  | 18.05899900 | 42.51146800 | 14.54524300 |
| H | 24.33985400 | 32.58894700 | 20.77874300 | H  | 18.27990000 | 40.02489000 | 14.55902000 |
| C | 23.10052600 | 33.95658700 | 19.67044900 | C  | 21.32690400 | 38.01430700 | 12.54443100 |
| H | 22.65584800 | 34.38142500 | 20.57732700 | N  | 21.96689400 | 38.57487200 | 11.47343300 |
| H | 23.95343800 | 34.58298100 | 19.38975900 | C  | 22.93291300 | 37.68048600 | 11.04997200 |
| C | 22.10774600 | 33.99493100 | 18.51781200 | C  | 22.84540800 | 36.58920000 | 11.86771600 |
| O | 22.52248800 | 33.98379900 | 17.33851700 | H  | 23.44895200 | 35.69687700 | 11.88823400 |
| N | 20.80617900 | 33.99934400 | 18.83637500 | H  | 23.58076400 | 37.90372700 | 10.21577800 |
| H | 20.47640800 | 34.02356500 | 19.80925600 | C  | 21.67718100 | 39.83047100 | 10.78321800 |
| H | 20.11418600 | 33.87524600 | 18.09273100 | H  | 21.94859300 | 39.71660200 | 9.73178800  |
| C | 25.36575500 | 32.49432300 | 18.13828500 | H  | 20.61249400 | 40.05208300 | 10.85978200 |
| O | 25.83155000 | 32.30315800 | 17.05900200 | H  | 22.25109300 | 40.65875700 | 11.21021000 |
| C | 26.30150300 | 33.88647300 | 13.62980400 | C  | 16.92395900 | 41.70559700 | 18.99693300 |
| C | 25.74407200 | 34.95875500 | 14.56326100 | C  | 17.38154200 | 42.79300300 | 18.24020900 |
| H | 18.03926600 | 33.81321900 | 8.99263700  | C  | 18.33327200 | 42.62691900 | 17.22713100 |
| H | 20.19124000 | 32.76565100 | 9.66866500  | C  | 18.82694000 | 41.34814700 | 16.97908300 |
| O | 24.61984400 | 35.45082700 | 14.34667600 | C  | 18.36950400 | 40.28287400 | 17.77124600 |
| C | 25.48134200 | 32.55923600 | 13.62343800 | C  | 17.42000700 | 40.41838800 | 18.77636900 |
| C | 18.52660800 | 34.12184700 | 9.91297900  | C  | 19.79726000 | 40.78834900 | 15.96912500 |
| C | 23.04190800 | 33.18366800 | 13.79850800 | C  | 19.94321300 | 39.39168000 | 16.42355400 |
| C | 19.73287800 | 33.53260900 | 10.28949500 | N  | 19.08318100 | 39.12347300 | 17.37288500 |
| C | 20.34227200 | 33.94112600 | 11.48283000 | H  | 16.18404100 | 41.86709300 | 19.77444900 |
| C | 18.61911900 | 35.46748900 | 11.89042700 | H  | 16.99319900 | 43.78530800 | 18.44737000 |
| C | 17.95610300 | 35.10649800 | 10.72047900 | H  | 18.68036100 | 43.48388200 | 16.65889900 |
| C | 21.63548000 | 33.38622200 | 11.96762900 | H  | 17.08861800 | 39.57333500 | 19.37180600 |
| C | 22.58717800 | 32.79995900 | 11.12700800 | H  | 20.73464900 | 41.33724200 | 15.85369300 |
| C | 23.83870000 | 32.48786500 | 11.66637100 | H  | 20.52144300 | 38.60118100 | 15.96461000 |
| C | 24.10664800 | 32.70943100 | 13.02037300 | H  | 18.81537400 | 38.14371800 | 17.54777300 |
| N | 19.77121600 | 34.89240200 | 12.26194700 | O  | 21.40221600 | 31.39992500 | 8.48348600  |
| N | 21.86679900 | 33.54721900 | 13.28710500 | H  | 21.39805100 | 30.46536200 | 8.76490700  |
| H | 26.30209300 | 34.31251400 | 12.61969100 | H  | 21.43634700 | 31.36650400 | 7.51570500  |
| H | 26.05814500 | 31.82619100 | 13.04844600 | O  | 15.87387000 | 35.55237000 | 16.08347000 |
| H | 25.41147500 | 32.18095300 | 14.64851800 | H  | 16.70740800 | 36.08581800 | 16.16857600 |
| H | 23.15539000 | 33.31284700 | 14.87028800 | H  | 15.15345100 | 36.17130700 | 15.89878400 |
| H | 18.25639800 | 36.25021700 | 12.54947900 | O  | 18.30268400 | 36.76126500 | 16.33788400 |
| H | 17.02406900 | 35.59235900 | 10.45163700 | H  | 18.56750300 | 37.22397300 | 15.50038800 |
| H | 22.37977700 | 32.61270500 | 10.07759500 | H  | 18.84925100 | 35.93630100 | 16.26529300 |
| H | 24.61635500 | 32.09355800 | 11.01581400 | O  | 22.09224500 | 35.92261300 | 15.49869700 |
| N | 26.49905300 | 35.37266000 | 15.60111700 | H  | 23.01492500 | 35.92332500 | 15.14159800 |
| H | 26.05003300 | 36.05598300 | 16.20838200 | H  | 22.08702500 | 35.19539200 | 16.17877800 |
| C | 27.80820100 | 34.86693300 | 16.03326200 | H  | 23.39883400 | 27.47149000 | 11.56125800 |
| H | 28.51347800 | 34.91745800 | 15.19596700 | H  | 27.33606900 | 33.64015000 | 13.87743500 |
| C | 28.38926800 | 35.68306700 | 17.19459500 | H  | 24.58261700 | 30.80386600 | 19.10790900 |



|   |             |             |             |   |              |              |              |
|---|-------------|-------------|-------------|---|--------------|--------------|--------------|
| H | 20.16036500 | 34.16756200 | 22.39046300 | 6 | 36.340063000 | 47.939341000 | 24.752953000 |
| H | 18.21905700 | 32.95476300 | 22.10040300 | 1 | 37.287562000 | 48.375345000 | 24.420944000 |
| H | 19.10514900 | 28.83613100 | 11.00441700 | 1 | 35.690775000 | 48.764738000 | 25.070973000 |
| H | 27.71751500 | 33.81729200 | 16.33590800 | 1 | 36.558910000 | 47.319484000 | 25.631733000 |
| H | 17.16745400 | 29.80635000 | 18.64590500 | 6 | 36.636519000 | 45.991863000 | 23.148356000 |
| H | 17.72336300 | 25.52302900 | 13.36966600 | 1 | 37.605674000 | 46.449284000 | 22.915906000 |

**Model C structures:**

**<sup>2</sup>Re<sub>proS,C</sub>**

|   |              |              |              |    |              |              |              |
|---|--------------|--------------|--------------|----|--------------|--------------|--------------|
| 6 | 40.959654000 | 38.964864000 | 27.259661000 | 1  | 35.912358000 | 45.886340000 | 21.086990000 |
| 1 | 40.951149000 | 40.060654000 | 27.244493000 | 6  | 34.242948000 | 45.689733000 | 25.212136000 |
| 6 | 39.742969000 | 38.411903000 | 28.005047000 | 8  | 34.606609000 | 44.504118000 | 25.166685000 |
| 1 | 38.818357000 | 38.699433000 | 27.489340000 | 7  | 33.797204000 | 46.208774000 | 26.387386000 |
| 1 | 39.775039000 | 37.315025000 | 28.001272000 | 1  | 33.488206000 | 47.170172000 | 26.421594000 |
| 6 | 39.682892000 | 38.920151000 | 29.464538000 | 6  | 33.790579000 | 45.423764000 | 27.608110000 |
| 1 | 40.628613000 | 38.678872000 | 29.966344000 | 1  | 34.819399000 | 45.219039000 | 27.933862000 |
| 1 | 39.582762000 | 40.011296000 | 29.470953000 | 6  | 33.030282000 | 46.173530000 | 28.719964000 |
| 6 | 38.521863000 | 38.352449000 | 30.270996000 | 1  | 33.424541000 | 47.196890000 | 28.764725000 |
| 8 | 37.377810000 | 38.836755000 | 30.240950000 | 1  | 31.971507000 | 46.253969000 | 28.438868000 |
| 7 | 38.801043000 | 37.266234000 | 31.024503000 | 6  | 33.120218000 | 45.524014000 | 30.107529000 |
| 1 | 39.743889000 | 36.918307000 | 31.122667000 | 1  | 32.439340000 | 46.035327000 | 30.795451000 |
| 1 | 38.096523000 | 36.897611000 | 31.653832000 | 1  | 32.809824000 | 44.476609000 | 30.061175000 |
| 6 | 42.800581000 | 42.599487000 | 26.097860000 | 16 | 34.793394000 | 45.499077000 | 30.871202000 |
| 1 | 43.180539000 | 42.959970000 | 25.137200000 | 6  | 34.943985000 | 47.230527000 | 31.443116000 |
| 6 | 41.268025000 | 42.841079000 | 26.174000000 | 1  | 35.905467000 | 47.311483000 | 31.956453000 |
| 1 | 40.781729000 | 42.060344000 | 25.572447000 | 1  | 34.936970000 | 47.935937000 | 30.608166000 |
| 1 | 40.930644000 | 42.702210000 | 27.207927000 | 1  | 34.144955000 | 47.478919000 | 32.147295000 |
| 6 | 40.843164000 | 44.200982000 | 25.656204000 | 6  | 33.132804000 | 44.045600000 | 27.365359000 |
| 6 | 40.786774000 | 44.436363000 | 24.274222000 | 8  | 33.323068000 | 43.068525000 | 28.020187000 |
| 1 | 41.012824000 | 43.626900000 | 23.582475000 | 7  | 31.931584000 | 42.091601000 | 24.232651000 |
| 6 | 40.473717000 | 45.700160000 | 23.773455000 | 1  | 32.619757000 | 42.645704000 | 24.762164000 |
| 1 | 40.458537000 | 45.867362000 | 22.699757000 | 6  | 32.652992000 | 41.169005000 | 23.400002000 |
| 6 | 40.193853000 | 46.750296000 | 24.651579000 | 1  | 32.100331000 | 41.070247000 | 22.449335000 |
| 1 | 39.969630000 | 47.740588000 | 24.264659000 | 6  | 34.112867000 | 41.525898000 | 23.068728000 |
| 6 | 40.222030000 | 46.522511000 | 26.028457000 | 1  | 34.578635000 | 40.660767000 | 22.589410000 |
| 1 | 40.017949000 | 47.337199000 | 26.718624000 | 1  | 34.122607000 | 42.360964000 | 22.356082000 |
| 6 | 40.546761000 | 45.258184000 | 26.526325000 | 8  | 34.868531000 | 41.840154000 | 24.230003000 |
| 1 | 40.611250000 | 45.100652000 | 27.599351000 | 1  | 34.809865000 | 42.798321000 | 24.408560000 |
| 6 | 43.516256000 | 43.346300000 | 27.213897000 | 6  | 32.541948000 | 39.725893000 | 24.012507000 |
| 8 | 43.590997000 | 44.568479000 | 27.248910000 | 8  | 33.362875000 | 38.853833000 | 23.749015000 |
| 7 | 44.003363000 | 42.540805000 | 28.209416000 | 7  | 31.440388000 | 39.551146000 | 24.781696000 |
| 1 | 43.917778000 | 41.539491000 | 28.111758000 | 1  | 30.851691000 | 40.371885000 | 24.890988000 |
| 6 | 44.564999000 | 43.068349000 | 29.438437000 | 6  | 31.007572000 | 38.266151000 | 25.304513000 |
| 1 | 44.747255000 | 44.129878000 | 29.261085000 | 1  | 31.826861000 | 37.563229000 | 25.137371000 |
| 6 | 43.658017000 | 42.843020000 | 30.658980000 | 6  | 30.645966000 | 38.340667000 | 26.793531000 |
| 1 | 43.504524000 | 41.763621000 | 30.793455000 | 1  | 31.532754000 | 38.621068000 | 27.372118000 |
| 1 | 44.224583000 | 43.169427000 | 31.544923000 | 1  | 29.895523000 | 39.125725000 | 26.949816000 |
| 6 | 42.307738000 | 43.536343000 | 30.666609000 | 6  | 30.078864000 | 37.016072000 | 27.332067000 |
| 6 | 41.168626000 | 42.841305000 | 31.098589000 | 1  | 29.706842000 | 37.173089000 | 28.352505000 |
| 1 | 41.258971000 | 41.790934000 | 31.370851000 | 1  | 29.219179000 | 36.696817000 | 26.730969000 |
| 6 | 39.932088000 | 43.479874000 | 31.221113000 | 6  | 31.129043000 | 35.912684000 | 27.414308000 |
| 1 | 39.070076000 | 42.921352000 | 31.580139000 | 8  | 32.227687000 | 36.092154000 | 27.951689000 |
| 6 | 39.811782000 | 44.834155000 | 30.904145000 | 7  | 30.788231000 | 34.718828000 | 26.872103000 |
| 1 | 38.857874000 | 45.344275000 | 31.018486000 | 1  | 29.881188000 | 34.548769000 | 26.462721000 |
| 6 | 40.934778000 | 45.535531000 | 30.456132000 | 1  | 31.420809000 | 33.934931000 | 26.969437000 |
| 1 | 40.856484000 | 46.590936000 | 30.209105000 | 6  | 33.530717000 | 34.568349000 | 22.570844000 |
| 6 | 42.168408000 | 44.893256000 | 30.337099000 | 6  | 33.689998000 | 35.191004000 | 23.959008000 |
| 1 | 43.023744000 | 45.456074000 | 29.977704000 | 16 | 35.312590000 | 34.693958000 | 24.670133000 |
| 6 | 34.276007000 | 46.627979000 | 24.020020000 | 6  | 36.940813000 | 41.958160000 | 26.409080000 |
| 1 | 33.823822000 | 46.091764000 | 23.179666000 | 6  | 37.406802000 | 43.159008000 | 26.941131000 |
| 6 | 35.698399000 | 47.116696000 | 23.625494000 | 6  | 37.247007000 | 43.413582000 | 28.303507000 |
| 1 | 35.534154000 | 47.790447000 | 22.772611000 | 6  | 36.603253000 | 42.460542000 | 29.086772000 |

|    |              |              |              |
|----|--------------|--------------|--------------|
| 6  | 35.208004000 | 35.464758000 | 26.320387000 |
| 6  | 35.421284000 | 36.965651000 | 26.407542000 |
| 6  | 35.845800000 | 37.780322000 | 25.357130000 |
| 6  | 36.096354000 | 39.135378000 | 25.574192000 |
| 6  | 35.925067000 | 39.669017000 | 26.849036000 |
| 6  | 35.194699000 | 37.593433000 | 27.637793000 |
| 6  | 36.334718000 | 41.028049000 | 27.256638000 |
| 7  | 35.436262000 | 38.889871000 | 27.848465000 |
| 7  | 36.169422000 | 41.301706000 | 28.572432000 |
| 1  | 33.571875000 | 33.475069000 | 22.612869000 |
| 1  | 33.632690000 | 36.282765000 | 23.895954000 |
| 1  | 32.898927000 | 34.839592000 | 24.631720000 |
| 1  | 36.412407000 | 39.769599000 | 24.756465000 |
| 1  | 34.823166000 | 37.025695000 | 28.482746000 |
| 1  | 37.023825000 | 41.756437000 | 25.349745000 |
| 1  | 37.909595000 | 43.880010000 | 26.304124000 |
| 1  | 37.619368000 | 44.323688000 | 28.758951000 |
| 1  | 36.431254000 | 42.606812000 | 30.146100000 |
| 1  | 35.984393000 | 34.964205000 | 26.912475000 |
| 1  | 34.248654000 | 35.218460000 | 26.789859000 |
| 1  | 35.990373000 | 37.350839000 | 24.371797000 |
| 29 | 35.323992000 | 39.817010000 | 29.627944000 |
| 6  | 33.069232000 | 37.726594000 | 30.545945000 |
| 6  | 32.435725000 | 37.529824000 | 31.758617000 |
| 7  | 32.921792000 | 38.460466000 | 32.633193000 |
| 6  | 33.843317000 | 39.205744000 | 31.952900000 |
| 7  | 33.937815000 | 38.762650000 | 30.686091000 |
| 6  | 32.529715000 | 38.533486000 | 34.045927000 |
| 1  | 32.899721000 | 37.205876000 | 29.610334000 |
| 1  | 31.687247000 | 36.810708000 | 32.056553000 |
| 1  | 33.356534000 | 38.192227000 | 34.673674000 |
| 1  | 31.674193000 | 37.873800000 | 34.191757000 |
| 1  | 32.236676000 | 39.551611000 | 34.305403000 |
| 6  | 34.632501000 | 40.389184000 | 32.315195000 |
| 6  | 34.638620000 | 40.982666000 | 33.640486000 |
| 6  | 35.079427000 | 42.244978000 | 33.841435000 |
| 6  | 35.127111000 | 42.927673000 | 35.162990000 |
| 8  | 35.299917000 | 40.884390000 | 31.368945000 |
| 1  | 34.285959000 | 40.389164000 | 34.475123000 |
| 1  | 35.406498000 | 42.821797000 | 32.977229000 |
| 1  | 36.147165000 | 43.281009000 | 35.365712000 |
| 1  | 34.807960000 | 42.280984000 | 35.984412000 |
| 1  | 34.495621000 | 43.826438000 | 35.148072000 |
| 6  | 35.621317000 | 36.056329000 | 34.398895000 |
| 6  | 36.042467000 | 36.986166000 | 33.421343000 |
| 6  | 36.802562000 | 38.102645000 | 33.768009000 |
| 6  | 37.157316000 | 38.298129000 | 35.115978000 |
| 6  | 36.722391000 | 37.342601000 | 36.083728000 |
| 6  | 35.954341000 | 36.224055000 | 35.739331000 |
| 6  | 37.913600000 | 39.292087000 | 35.823129000 |
| 6  | 37.920802000 | 38.925101000 | 37.144874000 |
| 7  | 37.199841000 | 37.758551000 | 37.306464000 |
| 1  | 35.036620000 | 35.190914000 | 34.099649000 |
| 1  | 35.763161000 | 36.828327000 | 32.381405000 |
| 1  | 37.125609000 | 38.808194000 | 33.006221000 |
| 1  | 35.635660000 | 35.504642000 | 36.488731000 |
| 1  | 38.404006000 | 40.159859000 | 35.404179000 |
| 1  | 38.389757000 | 39.399513000 | 37.995625000 |
| 1  | 37.089943000 | 37.262597000 | 38.178659000 |
| 1  | 45.536290000 | 42.596824000 | 29.630954000 |
| 1  | 43.003924000 | 41.522609000 | 26.151740000 |
| 1  | 41.893887000 | 38.642059000 | 27.734547000 |
| 1  | 40.976110000 | 38.610757000 | 26.223686000 |

|   |              |              |              |
|---|--------------|--------------|--------------|
| 1 | 33.645186000 | 47.503279000 | 24.217518000 |
| 1 | 34.313266000 | 34.913789000 | 21.887569000 |
| 1 | 32.564034000 | 34.857097000 | 22.144399000 |
| 1 | 30.141162000 | 37.905712000 | 24.730300000 |

**<sup>2</sup>Re<sub>proR,C</sub>**

|   |              |              |              |
|---|--------------|--------------|--------------|
| 6 | 40.540016000 | 38.619760000 | 29.543907000 |
| 1 | 40.128966000 | 39.553973000 | 29.944932000 |
| 6 | 39.438797000 | 37.585088000 | 29.294491000 |
| 1 | 38.716103000 | 37.974025000 | 28.567098000 |
| 1 | 39.872677000 | 36.679566000 | 28.851786000 |
| 6 | 38.690092000 | 37.207801000 | 30.593585000 |
| 1 | 39.401403000 | 36.801115000 | 31.322744000 |
| 1 | 38.235833000 | 38.100766000 | 31.035397000 |
| 6 | 37.575325000 | 36.215009000 | 30.331665000 |
| 8 | 36.441712000 | 36.558127000 | 29.947460000 |
| 7 | 37.871174000 | 34.911268000 | 30.499861000 |
| 1 | 38.787185000 | 34.599709000 | 30.788854000 |
| 1 | 37.177153000 | 34.210875000 | 30.272051000 |
| 6 | 41.403317000 | 44.117814000 | 26.455322000 |
| 1 | 42.431570000 | 44.309778000 | 26.783450000 |
| 6 | 41.209723000 | 44.631246000 | 25.006993000 |
| 1 | 41.842190000 | 44.027091000 | 24.346752000 |
| 1 | 40.169691000 | 44.443851000 | 24.717372000 |
| 6 | 41.548351000 | 46.098471000 | 24.837259000 |
| 6 | 42.831753000 | 46.493498000 | 24.435439000 |
| 1 | 43.580201000 | 45.735582000 | 24.213044000 |
| 6 | 43.158773000 | 47.844468000 | 24.303297000 |
| 1 | 44.156927000 | 48.129494000 | 23.982502000 |
| 6 | 42.202973000 | 48.825837000 | 24.573125000 |
| 1 | 42.453967000 | 49.877205000 | 24.464998000 |
| 6 | 40.920186000 | 48.446313000 | 24.974373000 |
| 1 | 40.168857000 | 49.204683000 | 25.179878000 |
| 6 | 40.596617000 | 47.094284000 | 25.104728000 |
| 1 | 39.595042000 | 46.804705000 | 25.414276000 |
| 6 | 40.388367000 | 44.728622000 | 27.413730000 |
| 8 | 39.179683000 | 44.488420000 | 27.313257000 |
| 7 | 40.897900000 | 45.554500000 | 28.365812000 |
| 1 | 41.881411000 | 45.782625000 | 28.310608000 |
| 6 | 40.080427000 | 46.308096000 | 29.305536000 |
| 1 | 39.042103000 | 46.031550000 | 29.109517000 |
| 6 | 40.453186000 | 46.039269000 | 30.778263000 |
| 1 | 41.514030000 | 46.276095000 | 30.930138000 |
| 1 | 39.889150000 | 46.752241000 | 31.393125000 |
| 6 | 40.169119000 | 44.627016000 | 31.244277000 |
| 6 | 41.184552000 | 43.664148000 | 31.311223000 |
| 1 | 42.199735000 | 43.937835000 | 31.034699000 |
| 6 | 40.917085000 | 42.364637000 | 31.747758000 |
| 1 | 41.723578000 | 41.638745000 | 31.805568000 |
| 6 | 39.621900000 | 42.007015000 | 32.127562000 |
| 1 | 39.420862000 | 41.001050000 | 32.489495000 |
| 6 | 38.596967000 | 42.955964000 | 32.062304000 |
| 1 | 37.584666000 | 42.700111000 | 32.369111000 |
| 6 | 38.870617000 | 44.252303000 | 31.621896000 |
| 1 | 38.070211000 | 44.988098000 | 31.579447000 |
| 6 | 34.940619000 | 45.546132000 | 23.530818000 |
| 1 | 34.671309000 | 44.711647000 | 22.877856000 |
| 6 | 36.311154000 | 46.139349000 | 23.083047000 |
| 1 | 36.177223000 | 46.373516000 | 22.017648000 |
| 6 | 36.631966000 | 47.455638000 | 23.807764000 |
| 1 | 37.533592000 | 47.913240000 | 23.387532000 |
| 1 | 35.816676000 | 48.183507000 | 23.705900000 |
| 1 | 36.818368000 | 47.294318000 | 24.876936000 |

|    |              |              |              |    |              |              |              |
|----|--------------|--------------|--------------|----|--------------|--------------|--------------|
| 6  | 37.486150000 | 45.147910000 | 23.196694000 | 6  | 35.441130000 | 38.730541000 | 26.707561000 |
| 1  | 38.392276000 | 45.682225000 | 22.883288000 | 6  | 34.375601000 | 36.718096000 | 27.243753000 |
| 1  | 37.641472000 | 44.883707000 | 24.252322000 | 6  | 36.153913000 | 39.899586000 | 27.260751000 |
| 6  | 37.348655000 | 43.870276000 | 22.359390000 | 7  | 34.958860000 | 37.857618000 | 27.628764000 |
| 1  | 36.570554000 | 43.203311000 | 22.745024000 | 7  | 36.267653000 | 39.916124000 | 28.613097000 |
| 1  | 38.287664000 | 43.305640000 | 22.364139000 | 1  | 31.346862000 | 34.080050000 | 21.758487000 |
| 1  | 37.114281000 | 44.102400000 | 21.313221000 | 1  | 32.108448000 | 36.583109000 | 23.397342000 |
| 6  | 34.922779000 | 45.016500000 | 24.951814000 | 1  | 31.095215000 | 35.244292000 | 23.987966000 |
| 8  | 35.191724000 | 43.835811000 | 25.239079000 | 1  | 35.604094000 | 39.189460000 | 24.609639000 |
| 7  | 34.610878000 | 45.892966000 | 25.936064000 | 1  | 34.027325000 | 36.065648000 | 28.037212000 |
| 1  | 34.405035000 | 46.852074000 | 25.692991000 | 1  | 36.593612000 | 40.910110000 | 25.410322000 |
| 6  | 34.667367000 | 45.530472000 | 27.344398000 | 1  | 37.850505000 | 42.762916000 | 26.554708000 |
| 1  | 35.711952000 | 45.416207000 | 27.667692000 | 1  | 38.042565000 | 42.747805000 | 29.021617000 |
| 6  | 33.959475000 | 46.610742000 | 28.188391000 | 1  | 36.965793000 | 40.869292000 | 30.305126000 |
| 1  | 34.310973000 | 47.592520000 | 27.844980000 | 1  | 34.178077000 | 34.221902000 | 26.019801000 |
| 1  | 32.881272000 | 46.573039000 | 27.982555000 | 1  | 32.595524000 | 34.982824000 | 26.066411000 |
| 6  | 34.185140000 | 46.490516000 | 29.701027000 | 1  | 34.556841000 | 37.058612000 | 23.894064000 |
| 1  | 33.516051000 | 47.179449000 | 30.226457000 | 29 | 35.286612000 | 38.403775000 | 29.533711000 |
| 1  | 33.948370000 | 45.483336000 | 30.055364000 | 6  | 32.438329000 | 37.064775000 | 30.316738000 |
| 16 | 35.903266000 | 46.817507000 | 30.262778000 | 6  | 31.790328000 | 36.923627000 | 31.530760000 |
| 6  | 35.939979000 | 48.645468000 | 30.216426000 | 7  | 32.555122000 | 37.541335000 | 32.480216000 |
| 1  | 36.924914000 | 48.950488000 | 30.579002000 | 6  | 33.651458000 | 38.052281000 | 31.837278000 |
| 1  | 35.810902000 | 49.031645000 | 29.201580000 | 7  | 33.587279000 | 37.754501000 | 30.527767000 |
| 1  | 35.176398000 | 49.067808000 | 30.875859000 | 6  | 32.181648000 | 37.623666000 | 33.896963000 |
| 6  | 33.968262000 | 44.172384000 | 27.572297000 | 1  | 32.109792000 | 36.730863000 | 29.338762000 |
| 8  | 34.189155000 | 43.418618000 | 28.467741000 | 1  | 30.860662000 | 36.436457000 | 31.785053000 |
| 7  | 32.115213000 | 42.419053000 | 24.443431000 | 1  | 32.963987000 | 37.188596000 | 34.522004000 |
| 1  | 32.976675000 | 42.656837000 | 24.954922000 | 1  | 31.265340000 | 37.049425000 | 34.036320000 |
| 6  | 32.444592000 | 41.441423000 | 23.444449000 | 1  | 31.997400000 | 38.665184000 | 34.171861000 |
| 1  | 31.783852000 | 41.609188000 | 22.576325000 | 6  | 34.796157000 | 38.844603000 | 32.297727000 |
| 6  | 33.898257000 | 41.415745000 | 22.936648000 | 6  | 34.958868000 | 39.297384000 | 33.666098000 |
| 1  | 34.036835000 | 40.516841000 | 22.331271000 | 6  | 36.009396000 | 40.063423000 | 34.035309000 |
| 1  | 34.064736000 | 42.290318000 | 22.292660000 | 6  | 36.228264000 | 40.609232000 | 35.401614000 |
| 8  | 34.848722000 | 41.373329000 | 23.990519000 | 8  | 35.643912000 | 39.125699000 | 31.405714000 |
| 1  | 35.004559000 | 42.280962000 | 24.328058000 | 1  | 34.196658000 | 39.048286000 | 34.392448000 |
| 6  | 31.995269000 | 40.019843000 | 23.946783000 | 1  | 36.748729000 | 40.315518000 | 33.277419000 |
| 8  | 32.493899000 | 38.997618000 | 23.490447000 | 1  | 37.216446000 | 40.315862000 | 35.779803000 |
| 7  | 30.991080000 | 40.059000000 | 24.855569000 | 1  | 35.463235000 | 40.284832000 | 36.111819000 |
| 1  | 30.671273000 | 40.989622000 | 25.108436000 | 1  | 36.229630000 | 41.707121000 | 35.360541000 |
| 6  | 30.261489000 | 38.887929000 | 25.314542000 | 6  | 31.173822000 | 41.426836000 | 34.160734000 |
| 1  | 30.816728000 | 38.012239000 | 24.971402000 | 6  | 31.299440000 | 41.054674000 | 32.803840000 |
| 6  | 30.097686000 | 38.868598000 | 26.839949000 | 6  | 32.325604000 | 41.559595000 | 32.009836000 |
| 1  | 31.083446000 | 38.814553000 | 27.314446000 | 6  | 33.243628000 | 42.462999000 | 32.574781000 |
| 1  | 29.628273000 | 39.803999000 | 27.169814000 | 6  | 33.093998000 | 42.826385000 | 33.944849000 |
| 6  | 29.231384000 | 37.693675000 | 27.325434000 | 6  | 32.070730000 | 42.313863000 | 34.749414000 |
| 1  | 29.028038000 | 37.815408000 | 28.396849000 | 6  | 34.372558000 | 43.194561000 | 32.067257000 |
| 1  | 28.259159000 | 37.701418000 | 26.818319000 | 6  | 34.850029000 | 43.961658000 | 33.101177000 |
| 6  | 29.924395000 | 36.343573000 | 27.162979000 | 7  | 34.099922000 | 43.726816000 | 34.239595000 |
| 8  | 31.070742000 | 36.142977000 | 27.578150000 | 1  | 30.346202000 | 41.039347000 | 34.748626000 |
| 7  | 29.209691000 | 35.373421000 | 26.543284000 | 1  | 30.557976000 | 40.390587000 | 32.366190000 |
| 1  | 28.262444000 | 35.516366000 | 26.224974000 | 1  | 32.395813000 | 41.294471000 | 30.957556000 |
| 1  | 29.600521000 | 34.442671000 | 26.472232000 | 1  | 31.960912000 | 42.614019000 | 35.787975000 |
| 6  | 31.557423000 | 35.148994000 | 21.866676000 | 1  | 34.752742000 | 43.176324000 | 31.054880000 |
| 6  | 31.914440000 | 35.509995000 | 23.309264000 | 1  | 35.657915000 | 44.680103000 | 33.116463000 |
| 16 | 33.412115000 | 34.559112000 | 23.815889000 | 1  | 34.177750000 | 44.249901000 | 35.099270000 |
| 6  | 36.713144000 | 40.917363000 | 26.486235000 | 1  | 40.189034000 | 47.380652000 | 29.097424000 |
| 6  | 37.398504000 | 41.954069000 | 27.118382000 | 1  | 41.247711000 | 43.032600000 | 26.474256000 |
| 6  | 37.512297000 | 41.953845000 | 28.508776000 | 1  | 41.284135000 | 38.245030000 | 30.256544000 |
| 6  | 36.923006000 | 40.916359000 | 29.223366000 | 1  | 41.063975000 | 38.857962000 | 28.612608000 |
| 6  | 33.574932000 | 35.023031000 | 25.575493000 | 1  | 34.167756000 | 46.315431000 | 23.410280000 |
| 6  | 34.221620000 | 36.359633000 | 25.898596000 | 1  | 32.369070000 | 35.409155000 | 21.179559000 |
| 6  | 34.675813000 | 37.276297000 | 24.949123000 | 1  | 30.666443000 | 35.705540000 | 21.556195000 |
| 6  | 35.284225000 | 38.466223000 | 25.348864000 | 1  | 29.271518000 | 38.858948000 | 24.835457000 |

**<sup>2</sup>TS1<sub>ProS,C</sub>**

|   |              |              |              |    |              |              |              |
|---|--------------|--------------|--------------|----|--------------|--------------|--------------|
| 6 | 38.315498000 | 35.574296000 | 28.356545000 | 1  | 37.045293000 | 46.652574000 | 29.571694000 |
| 1 | 38.585693000 | 36.166512000 | 27.473886000 | 1  | 36.413727000 | 47.441945000 | 28.123250000 |
| 6 | 37.707273000 | 36.457104000 | 29.449821000 | 6  | 32.681678000 | 45.566871000 | 29.164997000 |
| 1 | 36.780799000 | 36.922949000 | 29.093429000 | 8  | 33.424307000 | 44.591551000 | 29.371834000 |
| 1 | 37.434132000 | 35.837167000 | 30.314072000 | 7  | 31.460529000 | 45.615214000 | 29.754795000 |
| 6 | 38.670707000 | 37.570751000 | 29.908977000 | 1  | 30.830707000 | 46.375676000 | 29.538265000 |
| 1 | 39.615156000 | 37.129757000 | 30.250645000 | 6  | 30.999790000 | 44.536648000 | 30.609278000 |
| 1 | 38.904943000 | 38.225877000 | 29.062090000 | 1  | 31.660639000 | 44.442594000 | 31.480762000 |
| 6 | 38.045428000 | 38.427639000 | 30.997993000 | 6  | 29.556762000 | 44.796745000 | 31.082009000 |
| 8 | 37.119183000 | 39.216543000 | 30.774076000 | 1  | 29.514603000 | 45.826874000 | 31.458054000 |
| 7 | 38.541878000 | 38.250892000 | 32.248793000 | 1  | 28.874038000 | 44.742814000 | 30.222729000 |
| 1 | 39.258982000 | 37.569212000 | 32.446969000 | 6  | 29.065920000 | 43.830390000 | 32.168196000 |
| 1 | 38.099523000 | 38.719613000 | 33.029885000 | 1  | 28.011420000 | 44.028106000 | 32.384380000 |
| 6 | 43.667036000 | 39.919002000 | 25.447042000 | 1  | 29.133909000 | 42.795723000 | 31.821508000 |
| 1 | 44.646891000 | 39.892839000 | 24.956764000 | 16 | 29.999419000 | 43.877918000 | 33.749878000 |
| 6 | 42.928597000 | 38.581053000 | 25.219908000 | 6  | 29.283202000 | 45.370223000 | 34.529098000 |
| 1 | 43.473651000 | 37.799215000 | 25.760693000 | 1  | 29.756233000 | 45.470215000 | 35.509238000 |
| 1 | 41.939236000 | 38.658403000 | 25.685365000 | 1  | 29.486291000 | 46.275349000 | 33.950194000 |
| 6 | 42.802459000 | 38.192127000 | 23.760112000 | 1  | 28.205370000 | 45.251523000 | 34.670804000 |
| 6 | 43.706739000 | 37.288067000 | 23.187050000 | 6  | 31.087440000 | 43.183942000 | 29.865264000 |
| 1 | 44.487180000 | 36.847783000 | 23.804206000 | 8  | 31.095042000 | 42.108161000 | 30.375614000 |
| 6 | 43.615551000 | 36.937742000 | 21.838685000 | 7  | 32.293446000 | 43.434498000 | 26.316603000 |
| 1 | 44.324669000 | 36.231766000 | 21.415276000 | 1  | 32.379185000 | 43.251812000 | 27.327130000 |
| 6 | 42.612337000 | 37.487695000 | 21.038705000 | 6  | 33.532088000 | 43.040233000 | 25.709839000 |
| 1 | 42.536742000 | 37.212595000 | 19.990564000 | 1  | 33.667429000 | 43.620364000 | 24.782474000 |
| 6 | 41.703839000 | 38.389937000 | 21.596410000 | 6  | 34.798388000 | 43.202489000 | 26.568738000 |
| 1 | 40.917231000 | 38.819784000 | 20.981940000 | 1  | 35.628167000 | 42.712054000 | 26.055601000 |
| 6 | 41.799718000 | 38.739293000 | 22.944785000 | 1  | 35.030773000 | 44.268343000 | 26.680801000 |
| 1 | 41.095384000 | 39.452403000 | 23.366666000 | 8  | 34.655509000 | 42.593924000 | 27.850367000 |
| 6 | 42.852585000 | 41.125279000 | 24.992793000 | 1  | 34.324681000 | 43.264278000 | 28.484675000 |
| 8 | 41.682468000 | 41.291521000 | 25.364480000 | 6  | 33.424015000 | 41.551477000 | 25.210980000 |
| 7 | 43.491809000 | 41.999634000 | 24.180143000 | 8  | 34.431395000 | 40.872551000 | 25.045608000 |
| 1 | 44.425092000 | 41.761535000 | 23.872288000 | 7  | 32.161740000 | 41.146111000 | 24.948619000 |
| 6 | 42.895033000 | 43.219937000 | 23.650876000 | 1  | 31.426368000 | 41.817017000 | 25.147821000 |
| 1 | 41.871224000 | 43.252189000 | 24.028154000 | 6  | 31.839731000 | 39.813006000 | 24.459542000 |
| 6 | 43.670971000 | 44.493822000 | 24.047942000 | 1  | 32.792580000 | 39.346581000 | 24.202580000 |
| 1 | 44.714382000 | 44.391069000 | 23.721531000 | 6  | 31.096028000 | 38.961572000 | 25.500176000 |
| 1 | 43.250203000 | 45.323843000 | 23.467631000 | 1  | 31.634924000 | 39.014260000 | 26.450698000 |
| 6 | 43.618770000 | 44.822918000 | 25.524692000 | 1  | 30.092129000 | 39.369278000 | 25.670418000 |
| 6 | 44.561200000 | 44.297650000 | 26.420328000 | 6  | 30.977358000 | 37.491719000 | 25.074382000 |
| 1 | 45.358872000 | 43.660675000 | 26.045965000 | 1  | 30.347124000 | 36.951244000 | 25.792958000 |
| 6 | 44.505508000 | 44.598971000 | 27.782304000 | 1  | 30.479178000 | 37.405156000 | 24.100677000 |
| 1 | 45.254355000 | 44.191781000 | 28.456309000 | 6  | 32.335159000 | 36.788396000 | 25.046636000 |
| 6 | 43.505910000 | 45.442529000 | 28.272864000 | 8  | 33.222693000 | 37.038446000 | 25.866596000 |
| 1 | 43.478995000 | 45.700897000 | 29.328232000 | 7  | 32.502473000 | 35.868032000 | 24.064481000 |
| 6 | 42.562543000 | 45.977395000 | 27.390643000 | 1  | 31.768081000 | 35.632812000 | 23.413045000 |
| 1 | 41.798653000 | 46.659863000 | 27.755611000 | 1  | 33.356621000 | 35.326323000 | 24.033500000 |
| 6 | 42.618402000 | 45.664397000 | 26.030694000 | 6  | 35.432966000 | 38.827278000 | 21.117136000 |
| 1 | 41.890150000 | 46.098545000 | 25.348962000 | 6  | 35.319502000 | 38.412426000 | 22.584320000 |
| 6 | 33.077446000 | 46.743619000 | 28.293246000 | 16 | 36.614401000 | 37.159013000 | 22.969154000 |
| 1 | 33.740352000 | 46.349887000 | 27.518379000 | 6  | 39.649481000 | 42.280523000 | 27.661409000 |
| 6 | 33.786520000 | 47.905881000 | 29.050864000 | 6  | 39.918640000 | 43.361835000 | 28.499556000 |
| 1 | 34.110902000 | 48.596574000 | 28.259773000 | 6  | 38.997885000 | 43.713447000 | 29.487530000 |
| 6 | 32.819096000 | 48.674197000 | 29.964218000 | 6  | 37.830340000 | 42.964806000 | 29.605899000 |
| 1 | 33.308942000 | 49.558485000 | 30.385254000 | 6  | 36.515748000 | 37.081617000 | 24.804050000 |
| 1 | 31.935915000 | 49.022029000 | 29.414003000 | 6  | 37.082201000 | 38.278202000 | 25.531301000 |
| 1 | 32.478283000 | 48.058414000 | 30.805800000 | 6  | 38.358159000 | 38.789326000 | 25.272459000 |
| 6 | 35.043608000 | 47.466269000 | 29.827416000 | 6  | 38.842236000 | 39.869798000 | 26.005458000 |
| 1 | 35.455604000 | 48.358528000 | 30.316271000 | 6  | 38.040192000 | 40.423595000 | 27.006979000 |
| 1 | 34.751349000 | 46.782610000 | 30.636904000 | 6  | 36.340068000 | 38.904082000 | 26.539640000 |
| 6 | 36.137901000 | 46.811164000 | 28.977321000 | 6  | 38.454437000 | 41.573488000 | 27.838945000 |
| 1 | 35.820186000 | 45.835169000 | 28.595848000 | 7  | 36.805741000 | 39.926624000 | 27.268276000 |
|   |              |              |              | 7  | 37.574110000 | 41.925142000 | 28.803331000 |

|    |              |              |              |
|----|--------------|--------------|--------------|
| 1  | 35.323870000 | 37.969051000 | 20.445248000 |
| 1  | 35.440619000 | 39.274397000 | 23.246413000 |
| 1  | 34.339190000 | 37.965457000 | 22.782807000 |
| 1  | 39.831260000 | 40.269534000 | 25.802260000 |
| 1  | 35.334553000 | 38.571258000 | 26.756506000 |
| 1  | 40.355193000 | 42.006645000 | 26.882852000 |
| 1  | 40.837998000 | 43.926073000 | 28.369858000 |
| 1  | 39.174053000 | 44.553657000 | 30.150773000 |
| 1  | 37.067631000 | 43.180530000 | 30.345317000 |
| 1  | 37.098053000 | 36.188610000 | 25.061196000 |
| 1  | 35.483942000 | 36.901127000 | 25.120798000 |
| 1  | 38.967159000 | 38.351602000 | 24.486301000 |
| 29 | 35.886061000 | 40.797567000 | 28.894591000 |
| 6  | 33.464830000 | 38.665187000 | 28.744414000 |
| 6  | 32.460336000 | 38.375714000 | 29.636301000 |
| 7  | 32.624618000 | 39.204020000 | 30.719216000 |
| 6  | 33.718748000 | 39.980387000 | 30.466799000 |
| 7  | 34.238280000 | 39.661359000 | 29.271682000 |
| 6  | 31.716270000 | 39.241593000 | 31.865470000 |
| 1  | 33.624433000 | 38.213134000 | 27.776065000 |
| 1  | 31.652444000 | 37.661752000 | 29.588057000 |
| 1  | 32.213634000 | 38.867456000 | 32.764377000 |
| 1  | 30.864224000 | 38.598469000 | 31.642738000 |
| 1  | 31.362470000 | 40.261142000 | 32.021816000 |
| 6  | 34.363015000 | 41.051130000 | 31.246225000 |
| 6  | 34.020514000 | 41.375830000 | 32.563492000 |
| 6  | 34.678913000 | 42.415184000 | 33.255735000 |
| 6  | 34.081813000 | 42.906801000 | 34.550653000 |
| 8  | 35.315958000 | 41.651915000 | 30.621127000 |
| 1  | 33.310320000 | 40.765537000 | 33.104728000 |
| 1  | 35.121443000 | 43.179685000 | 32.622736000 |
| 1  | 34.716680000 | 43.642043000 | 35.051207000 |
| 1  | 33.881485000 | 42.084418000 | 35.244725000 |
| 1  | 33.120133000 | 43.388379000 | 34.328017000 |
| 6  | 36.210721000 | 38.829402000 | 36.818292000 |
| 6  | 35.816166000 | 38.380035000 | 35.545198000 |
| 6  | 35.891461000 | 39.210702000 | 34.426670000 |
| 6  | 36.376257000 | 40.515185000 | 34.592832000 |
| 6  | 36.777217000 | 40.936448000 | 35.881076000 |
| 6  | 36.699665000 | 40.120397000 | 37.008737000 |
| 6  | 36.543305000 | 41.650606000 | 33.683715000 |
| 6  | 37.163898000 | 42.648004000 | 34.465987000 |
| 7  | 37.245582000 | 42.249759000 | 35.753042000 |
| 1  | 36.138693000 | 38.158278000 | 37.668210000 |
| 1  | 35.448484000 | 37.364149000 | 35.434828000 |
| 1  | 35.593982000 | 38.857641000 | 33.444016000 |
| 1  | 37.010618000 | 40.466311000 | 37.989949000 |
| 1  | 36.735849000 | 41.541069000 | 32.621427000 |
| 1  | 37.499491000 | 43.634376000 | 34.173897000 |
| 1  | 37.581935000 | 42.821458000 | 36.517442000 |
| 1  | 42.851678000 | 43.149369000 | 22.556808000 |
| 1  | 43.846583000 | 40.050740000 | 26.522186000 |
| 1  | 39.223340000 | 35.070529000 | 28.708094000 |
| 1  | 37.608418000 | 34.799827000 | 28.040674000 |
| 1  | 32.191961000 | 47.144547000 | 27.784782000 |
| 1  | 36.398774000 | 39.299261000 | 20.910921000 |
| 1  | 34.643704000 | 39.546882000 | 20.872350000 |
| 1  | 31.246275000 | 39.898998000 | 23.540482000 |

**2<sup>TS1</sup>ProR,C**

|   |              |              |              |
|---|--------------|--------------|--------------|
| 6 | 38.643256000 | 43.243216000 | 27.628862000 |
| 1 | 37.883490000 | 43.705400000 | 28.271121000 |
| 6 | 38.573417000 | 41.715531000 | 27.699448000 |
| 1 | 37.594514000 | 41.370380000 | 27.346898000 |
| 1 | 39.320994000 | 41.278846000 | 27.025079000 |
| 6 | 38.808619000 | 41.182912000 | 29.129816000 |
| 1 | 39.793521000 | 41.503290000 | 29.488713000 |
| 1 | 38.057968000 | 41.595253000 | 29.813323000 |
| 6 | 38.681269000 | 39.673646000 | 29.183809000 |
| 8 | 37.581249000 | 39.093530000 | 29.130611000 |
| 7 | 39.826647000 | 38.967909000 | 29.253112000 |
| 1 | 40.738907000 | 39.407455000 | 29.285702000 |
| 1 | 39.778035000 | 37.957182000 | 29.234322000 |
| 6 | 39.782551000 | 45.401179000 | 31.084474000 |
| 1 | 40.272388000 | 45.259924000 | 30.113714000 |
| 6 | 40.462570000 | 46.574957000 | 31.841118000 |
| 1 | 40.279625000 | 47.489598000 | 31.264525000 |
| 1 | 39.962804000 | 46.703958000 | 32.807873000 |
| 6 | 41.951610000 | 46.381911000 | 32.046943000 |
| 6 | 42.843991000 | 46.529912000 | 30.973858000 |
| 1 | 42.466027000 | 46.827344000 | 29.997337000 |
| 6 | 44.214743000 | 46.326696000 | 31.147903000 |
| 1 | 44.892422000 | 46.465282000 | 30.309814000 |
| 6 | 44.717005000 | 45.971802000 | 32.403379000 |
| 1 | 45.784208000 | 45.826491000 | 32.543618000 |
| 6 | 43.840029000 | 45.827518000 | 33.480747000 |
| 1 | 44.223725000 | 45.570887000 | 34.464392000 |
| 6 | 42.469327000 | 46.030628000 | 33.300713000 |
| 1 | 41.794375000 | 45.926295000 | 34.147388000 |
| 6 | 39.806107000 | 44.112811000 | 31.894039000 |
| 8 | 38.928250000 | 43.846764000 | 32.728177000 |
| 7 | 40.863800000 | 43.295014000 | 31.676771000 |
| 1 | 41.584236000 | 43.606626000 | 31.038099000 |
| 6 | 41.164800000 | 42.141989000 | 32.521652000 |
| 1 | 40.569360000 | 41.276064000 | 32.200868000 |
| 6 | 42.664010000 | 41.794856000 | 32.475544000 |
| 1 | 43.237292000 | 42.666824000 | 32.811812000 |
| 1 | 42.838375000 | 40.997237000 | 33.207298000 |
| 6 | 43.140183000 | 41.350399000 | 31.106629000 |
| 6 | 43.773785000 | 42.244647000 | 30.232652000 |
| 1 | 43.979535000 | 43.262095000 | 30.560887000 |
| 6 | 44.179637000 | 41.837882000 | 28.957353000 |
| 1 | 44.676672000 | 42.544997000 | 28.299227000 |
| 6 | 43.970539000 | 40.523915000 | 28.539992000 |
| 1 | 44.303982000 | 40.201081000 | 27.558084000 |
| 6 | 43.357872000 | 39.614499000 | 29.409311000 |
| 1 | 43.239675000 | 38.575346000 | 29.110249000 |
| 6 | 42.942224000 | 40.027064000 | 30.678064000 |
| 1 | 42.492840000 | 39.306966000 | 31.359659000 |
| 6 | 28.379187016 | 45.845778093 | 25.792331375 |
| 1 | 28.191480685 | 44.878315815 | 25.316629135 |
| 6 | 29.883702867 | 46.218408525 | 25.644949987 |
| 1 | 30.058707951 | 46.246673734 | 24.560086086 |
| 6 | 30.171610694 | 47.620796518 | 26.201569284 |
| 1 | 31.205972495 | 47.913571167 | 25.992491511 |
| 1 | 29.518554889 | 48.377634824 | 25.749355006 |
| 1 | 30.033295827 | 47.659657221 | 27.289521672 |
| 6 | 30.850283792 | 45.175245102 | 26.240536737 |
| 1 | 31.870563595 | 45.535771297 | 26.053600163 |
| 1 | 30.728586918 | 45.144363807 | 27.330684946 |
| 6 | 30.707512596 | 43.759000631 | 25.671986405 |
| 1 | 29.760655140 | 43.298007330 | 25.972648284 |

|    |              |              |              |    |              |              |              |
|----|--------------|--------------|--------------|----|--------------|--------------|--------------|
| 1  | 31.514441979 | 43.113723184 | 26.036374490 | 1  | 33.344868000 | 33.593849000 | 22.152361000 |
| 1  | 30.756262706 | 43.758353347 | 24.576018985 | 1  | 32.693708000 | 36.068890000 | 23.875395000 |
| 6  | 27.908283008 | 45.729998625 | 27.227747290 | 1  | 32.901355000 | 34.416020000 | 24.501331000 |
| 8  | 28.252003008 | 44.881840625 | 28.064643290 | 1  | 33.720308000 | 40.253137000 | 24.815894000 |
| 7  | 27.755979281 | 46.770491930 | 28.088358008 | 1  | 35.642132000 | 37.035569000 | 27.980001000 |
| 1  | 27.534794839 | 47.690836551 | 27.734765216 | 1  | 33.081145000 | 42.082849000 | 25.784209000 |
| 6  | 27.894870971 | 46.572284998 | 29.519438314 | 1  | 32.878404000 | 44.283182000 | 26.901513000 |
| 1  | 28.926097799 | 46.282885726 | 29.763196085 | 1  | 33.929141000 | 44.614636000 | 29.170761000 |
| 6  | 27.523760355 | 47.854919119 | 30.287545959 | 1  | 35.111630000 | 42.656438000 | 30.223502000 |
| 1  | 28.075743811 | 48.685670490 | 29.829336690 | 1  | 36.285218000 | 35.606931000 | 25.812109000 |
| 1  | 26.455067898 | 48.067806516 | 30.148500065 | 1  | 34.623197000 | 35.199244000 | 26.213121000 |
| 6  | 27.827382463 | 47.800587130 | 31.791694949 | 1  | 34.195214000 | 37.958134000 | 24.040147000 |
| 1  | 27.464804854 | 48.716332206 | 32.269616719 | 29 | 35.467969000 | 39.661733000 | 29.497568000 |
| 1  | 27.301638385 | 46.964178609 | 32.261122520 | 6  | 34.341851000 | 36.873544000 | 30.685153000 |
| 16 | 29.593736473 | 47.566488116 | 32.235996402 | 6  | 34.314629000 | 36.379507000 | 31.966596000 |
| 6  | 30.258234018 | 49.238620463 | 31.908641791 | 7  | 34.865435000 | 37.339288000 | 32.788628000 |
| 1  | 31.314680926 | 49.215241869 | 32.187607275 | 6  | 35.213597000 | 38.396750000 | 31.994533000 |
| 1  | 30.185233498 | 49.512020785 | 30.852391986 | 7  | 34.904566000 | 38.119003000 | 30.721501000 |
| 1  | 29.748726866 | 49.986104035 | 32.523533429 | 6  | 35.011941000 | 37.183936000 | 34.235517000 |
| 6  | 26.996826560 | 45.405543433 | 29.979061160 | 1  | 33.974156000 | 36.420626000 | 29.772057000 |
| 8  | 27.159151634 | 44.731359575 | 30.949462583 | 1  | 33.953153000 | 35.442218000 | 32.362323000 |
| 7  | 29.843390000 | 41.234909000 | 25.065750000 | 1  | 36.066671000 | 37.213532000 | 34.519576000 |
| 1  | 30.262478000 | 42.169093000 | 24.969945000 | 1  | 34.597990000 | 36.215380000 | 34.517707000 |
| 6  | 30.288541000 | 40.407233000 | 23.977205000 | 1  | 34.464717000 | 37.969138000 | 34.763134000 |
| 1  | 29.391682000 | 40.148474000 | 23.380614000 | 6  | 35.828090000 | 39.708111000 | 32.285704000 |
| 6  | 31.303539000 | 41.021098000 | 23.010413000 | 6  | 36.273695000 | 40.089369000 | 33.546524000 |
| 1  | 31.648244000 | 40.247913000 | 22.313638000 | 6  | 36.963776000 | 41.312855000 | 33.773701000 |
| 1  | 30.801905000 | 41.813327000 | 22.439026000 | 6  | 37.724114000 | 41.471963000 | 35.067051000 |
| 8  | 32.391071000 | 41.573723000 | 23.748187000 | 8  | 35.917286000 | 40.485941000 | 31.246198000 |
| 1  | 32.783760000 | 42.286988000 | 23.204942000 | 1  | 36.074329000 | 39.455582000 | 34.400064000 |
| 6  | 30.739988000 | 39.010360000 | 24.514819000 | 1  | 37.446147000 | 41.759560000 | 32.908165000 |
| 8  | 31.468626000 | 38.279582000 | 23.849958000 | 1  | 38.462906000 | 40.663154000 | 35.142436000 |
| 7  | 30.203364000 | 38.690519000 | 25.716884000 | 1  | 37.070838000 | 41.395437000 | 35.942897000 |
| 1  | 29.617271000 | 39.407162000 | 26.134674000 | 1  | 38.264747000 | 42.419557000 | 35.096542000 |
| 6  | 30.286908000 | 37.367110000 | 26.311683000 | 6  | 33.166703000 | 42.626235000 | 37.282516000 |
| 1  | 31.021469000 | 36.805335000 | 25.729743000 | 6  | 32.833892000 | 41.683950000 | 36.293661000 |
| 6  | 30.679167000 | 37.415897000 | 27.794362000 | 6  | 33.517874000 | 41.636302000 | 35.078466000 |
| 1  | 31.675767000 | 37.858392000 | 27.898715000 | 6  | 34.552419000 | 42.551304000 | 34.855007000 |
| 1  | 29.977660000 | 38.062649000 | 28.336768000 | 6  | 34.858111000 | 43.493485000 | 35.861104000 |
| 6  | 30.667672000 | 36.025609000 | 28.456232000 | 6  | 34.189380000 | 43.552490000 | 37.081422000 |
| 1  | 30.808240000 | 36.143032000 | 29.537385000 | 6  | 35.492730000 | 42.771644000 | 33.755024000 |
| 1  | 29.693199000 | 35.543467000 | 28.311676000 | 6  | 36.235917000 | 43.922029000 | 34.121832000 |
| 6  | 31.804734000 | 35.134858000 | 27.964203000 | 7  | 35.895971000 | 44.299580000 | 35.364429000 |
| 8  | 32.987118000 | 35.474481000 | 28.065537000 | 1  | 32.613233000 | 42.639771000 | 38.216187000 |
| 7  | 31.445085000 | 33.951596000 | 27.407577000 | 1  | 32.021341000 | 40.987934000 | 36.479805000 |
| 1  | 30.483980000 | 33.650375000 | 27.344481000 | 1  | 33.242382000 | 40.914291000 | 34.315387000 |
| 1  | 32.167911000 | 33.306429000 | 27.116185000 | 1  | 34.441740000 | 44.286953000 | 37.840356000 |
| 6  | 32.856023000 | 34.556695000 | 22.333099000 | 1  | 35.275814000 | 42.536503000 | 32.720178000 |
| 6  | 33.204732000 | 35.114931000 | 23.713085000 | 1  | 37.050624000 | 44.389917000 | 33.580445000 |
| 16 | 35.031713000 | 35.349600000 | 23.824713000 | 1  | 36.349538000 | 45.040073000 | 35.884498000 |
| 6  | 33.543503000 | 42.248454000 | 26.752862000 | 1  | 40.861979000 | 42.381742000 | 33.545691000 |
| 6  | 33.426153000 | 43.482912000 | 27.389571000 | 1  | 38.733629000 | 45.650745000 | 30.896718000 |
| 6  | 34.001531000 | 43.666524000 | 28.648707000 | 1  | 39.624737000 | 43.612604000 | 27.949355000 |
| 6  | 34.660507000 | 42.592274000 | 29.239005000 | 1  | 38.475083000 | 43.594717000 | 26.605570000 |
| 6  | 35.241003000 | 35.840802000 | 25.573216000 | 1  | 27.778371447 | 46.591872935 | 25.257853697 |
| 6  | 34.954939000 | 37.286627000 | 25.937031000 | 1  | 33.155702000 | 35.248081000 | 21.538820000 |
| 6  | 34.418198000 | 38.232410000 | 25.064405000 | 1  | 31.773122000 | 34.410545000 | 22.256266000 |
| 6  | 34.156031000 | 39.532072000 | 25.501693000 | 1  | 29.320233000 | 36.852340000 | 26.204093000 |
| 6  | 34.442772000 | 39.873712000 | 26.821027000 |    |              |              |              |
| 6  | 35.218146000 | 37.713406000 | 27.246465000 |    |              |              |              |
| 6  | 34.238033000 | 41.219635000 | 27.397815000 |    |              |              |              |
| 7  | 34.971735000 | 38.955824000 | 27.669474000 |    |              |              |              |
| 7  | 34.772836000 | 41.403663000 | 28.629444000 |    |              |              |              |

**2Int1**ProS,C

|   |              |              |              |    |              |              |              |
|---|--------------|--------------|--------------|----|--------------|--------------|--------------|
| 6 | 38.253290000 | 35.464338000 | 28.326479000 | 1  | 37.183320000 | 46.897888000 | 29.926996000 |
| 1 | 38.504404000 | 36.057499000 | 27.438959000 | 1  | 36.617354000 | 47.716606000 | 28.468092000 |
| 6 | 37.677996000 | 36.348647000 | 29.436497000 | 6  | 32.890394000 | 45.677123000 | 29.171608000 |
| 1 | 36.746557000 | 36.820671000 | 29.101727000 | 8  | 33.654936000 | 44.732261000 | 29.425066000 |
| 1 | 37.420054000 | 35.728614000 | 30.305372000 | 7  | 31.614991000 | 45.667625000 | 29.639318000 |
| 6 | 38.661831000 | 37.454747000 | 29.873698000 | 1  | 30.983791000 | 46.412013000 | 29.376208000 |
| 1 | 39.608796000 | 37.003024000 | 30.194871000 | 6  | 31.108278000 | 44.570451000 | 30.440904000 |
| 1 | 38.881561000 | 38.110066000 | 29.024434000 | 1  | 31.719810000 | 44.458992000 | 31.345936000 |
| 6 | 38.072538000 | 38.314924000 | 30.979842000 | 6  | 29.641473000 | 44.826225000 | 30.839432000 |
| 8 | 37.254517000 | 39.213969000 | 30.766724000 | 1  | 29.580583000 | 45.854436000 | 31.217988000 |
| 7 | 38.478794000 | 38.008319000 | 32.242025000 | 1  | 29.004057000 | 44.778346000 | 29.945650000 |
| 1 | 39.101980000 | 37.237312000 | 32.430493000 | 6  | 29.092359000 | 43.855739000 | 31.893651000 |
| 1 | 38.033059000 | 38.466402000 | 33.026057000 | 1  | 28.030187000 | 44.060616000 | 32.060823000 |
| 6 | 43.598980000 | 39.899382000 | 25.571747000 | 1  | 29.169199000 | 42.823480000 | 31.542327000 |
| 1 | 44.601337000 | 39.890409000 | 25.128422000 | 16 | 29.950903000 | 43.884158000 | 33.517320000 |
| 6 | 42.884173000 | 38.559856000 | 25.283316000 | 6  | 29.211601000 | 45.376105000 | 34.275236000 |
| 1 | 43.415150000 | 37.770516000 | 25.827268000 | 1  | 29.636338000 | 45.461089000 | 35.278636000 |
| 1 | 41.875570000 | 38.617044000 | 25.708213000 | 1  | 29.452542000 | 46.284957000 | 33.717043000 |
| 6 | 42.822248000 | 38.206862000 | 23.810356000 | 1  | 28.126844000 | 45.267776000 | 34.362025000 |
| 6 | 43.780542000 | 37.355361000 | 23.243843000 | 6  | 31.239943000 | 43.226471000 | 29.686862000 |
| 1 | 44.555306000 | 36.925680000 | 23.875678000 | 8  | 31.134631000 | 42.145654000 | 30.172907000 |
| 6 | 43.749463000 | 37.043027000 | 21.883454000 | 7  | 32.188824000 | 43.394826000 | 26.294910000 |
| 1 | 44.499152000 | 36.376871000 | 21.465433000 | 1  | 32.236159000 | 43.242248000 | 27.314635000 |
| 6 | 42.753781000 | 37.578959000 | 21.064702000 | 6  | 33.451813000 | 43.000212000 | 25.741788000 |
| 1 | 42.724875000 | 37.333046000 | 20.007028000 | 1  | 33.628078000 | 43.584911000 | 24.823792000 |
| 6 | 41.792087000 | 38.428357000 | 21.615732000 | 6  | 34.679641000 | 43.154111000 | 26.654545000 |
| 1 | 41.010254000 | 38.845901000 | 20.986861000 | 1  | 35.537407000 | 42.692535000 | 26.159599000 |
| 6 | 41.827274000 | 38.739462000 | 22.976313000 | 1  | 34.888330000 | 44.218637000 | 26.810774000 |
| 1 | 41.079787000 | 39.409890000 | 23.394194000 | 8  | 34.484434000 | 42.505983000 | 27.909936000 |
| 6 | 42.794369000 | 41.105583000 | 25.100465000 | 1  | 34.251908000 | 43.181674000 | 28.578465000 |
| 8 | 41.613856000 | 41.265397000 | 25.439669000 | 6  | 33.367567000 | 41.515941000 | 25.226489000 |
| 7 | 43.452867000 | 41.985496000 | 24.308885000 | 8  | 34.385882000 | 40.852418000 | 25.064234000 |
| 1 | 44.392945000 | 41.748855000 | 24.021396000 | 7  | 32.113381000 | 41.096803000 | 24.947297000 |
| 6 | 42.862464000 | 43.199945000 | 23.759575000 | 1  | 31.368795000 | 41.758710000 | 25.142364000 |
| 1 | 41.832103000 | 43.232614000 | 24.118727000 | 6  | 31.812643000 | 39.763138000 | 24.447413000 |
| 6 | 43.628605000 | 44.478669000 | 24.160034000 | 1  | 32.773498000 | 39.309955000 | 24.196182000 |
| 1 | 44.677257000 | 44.376803000 | 23.850550000 | 6  | 31.070341000 | 38.896489000 | 25.476329000 |
| 1 | 43.214716000 | 45.303948000 | 23.567952000 | 1  | 31.607482000 | 38.938935000 | 26.428317000 |
| 6 | 43.552800000 | 44.817525000 | 25.633546000 | 1  | 30.064866000 | 39.299284000 | 25.649830000 |
| 6 | 44.480627000 | 44.298151000 | 26.547614000 | 6  | 30.955696000 | 37.431639000 | 25.031851000 |
| 1 | 45.283849000 | 43.658658000 | 26.190026000 | 1  | 30.327578000 | 36.880875000 | 25.744447000 |
| 6 | 44.402818000 | 44.607875000 | 27.906416000 | 1  | 30.457464000 | 37.356188000 | 24.057203000 |
| 1 | 45.140602000 | 44.204779000 | 28.594902000 | 6  | 32.315292000 | 36.732691000 | 24.995938000 |
| 6 | 43.395395000 | 45.453807000 | 28.375541000 | 8  | 33.193578000 | 36.959131000 | 25.831962000 |
| 1 | 43.350642000 | 45.717945000 | 29.428863000 | 7  | 32.495595000 | 35.844284000 | 23.986304000 |
| 6 | 42.466607000 | 45.983546000 | 27.475213000 | 1  | 31.768546000 | 35.627628000 | 23.320472000 |
| 1 | 41.697031000 | 46.668412000 | 27.823476000 | 1  | 33.353133000 | 35.308577000 | 23.945007000 |
| 6 | 42.544408000 | 45.662400000 | 26.118073000 | 6  | 35.442449000 | 38.808431000 | 21.153085000 |
| 1 | 41.827253000 | 46.092361000 | 25.421931000 | 6  | 35.307071000 | 38.375196000 | 22.613155000 |
| 6 | 33.318168000 | 46.896238000 | 28.374013000 | 16 | 36.588232000 | 37.107602000 | 22.998426000 |
| 1 | 34.058766000 | 46.553133000 | 27.646811000 | 6  | 39.514717000 | 42.274785000 | 27.679822000 |
| 6 | 33.921461000 | 48.050251000 | 29.230700000 | 6  | 39.745075000 | 43.388830000 | 28.485454000 |
| 1 | 34.272468000 | 48.788941000 | 28.496309000 | 6  | 38.799145000 | 43.751673000 | 29.445864000 |
| 6 | 32.859192000 | 48.735730000 | 30.103030000 | 6  | 37.651165000 | 42.974891000 | 29.575427000 |
| 1 | 33.281325000 | 49.611880000 | 30.606466000 | 6  | 36.477127000 | 37.016883000 | 24.832580000 |
| 1 | 32.008466000 | 49.082955000 | 29.503568000 | 6  | 37.028643000 | 38.214203000 | 25.569854000 |
| 1 | 32.477522000 | 48.063005000 | 30.880893000 | 6  | 38.303209000 | 38.735259000 | 25.324155000 |
| 6 | 35.137992000 | 47.624222000 | 30.075986000 | 6  | 38.768678000 | 39.822745000 | 26.058834000 |
| 1 | 35.480640000 | 48.509874000 | 30.626705000 | 6  | 37.948944000 | 40.372513000 | 27.048512000 |
| 1 | 34.817504000 | 46.896839000 | 30.834870000 | 6  | 36.272086000 | 38.832959000 | 26.572067000 |
| 6 | 36.311153000 | 47.043558000 | 29.278361000 | 6  | 38.333905000 | 41.545005000 | 27.863739000 |
| 1 | 36.056614000 | 46.072485000 | 28.841454000 | 7  | 36.719886000 | 39.861116000 | 27.303135000 |
|   |              |              |              | 7  | 37.435329000 | 41.901299000 | 28.807346000 |

|    |              |              |              |
|----|--------------|--------------|--------------|
| 1  | 35.337145000 | 37.959763000 | 20.468497000 |
| 1  | 35.425475000 | 39.228033000 | 23.287663000 |
| 1  | 34.321141000 | 37.933256000 | 22.792958000 |
| 1  | 39.755363000 | 40.232043000 | 25.863501000 |
| 1  | 35.267725000 | 38.490452000 | 26.780398000 |
| 1  | 40.237241000 | 41.994834000 | 26.919307000 |
| 1  | 40.651954000 | 43.971719000 | 28.349876000 |
| 1  | 38.940121000 | 44.623791000 | 30.075733000 |
| 1  | 36.867971000 | 43.194182000 | 30.292715000 |
| 1  | 37.064316000 | 36.126115000 | 25.086401000 |
| 1  | 35.444437000 | 36.827099000 | 25.140289000 |
| 1  | 38.923405000 | 38.301560000 | 24.544482000 |
| 29 | 35.786202000 | 40.711526000 | 28.943346000 |
| 6  | 33.375001000 | 38.570342000 | 28.758949000 |
| 6  | 32.329803000 | 38.321445000 | 29.609313000 |
| 7  | 32.479153000 | 39.160342000 | 30.693451000 |
| 6  | 33.605452000 | 39.896669000 | 30.479277000 |
| 7  | 34.160886000 | 39.551697000 | 29.309892000 |
| 6  | 31.527630000 | 39.258537000 | 31.796687000 |
| 1  | 33.561387000 | 38.105026000 | 27.802053000 |
| 1  | 31.501696000 | 37.632876000 | 29.538529000 |
| 1  | 31.958589000 | 38.860784000 | 32.720059000 |
| 1  | 30.645393000 | 38.670635000 | 31.540112000 |
| 1  | 31.234126000 | 40.299930000 | 31.937640000 |
| 6  | 34.251524000 | 40.948294000 | 31.283324000 |
| 6  | 33.921969000 | 41.273219000 | 32.574243000 |
| 6  | 34.687905000 | 42.318678000 | 33.288954000 |
| 6  | 34.030956000 | 42.777676000 | 34.590249000 |
| 8  | 35.244567000 | 41.541270000 | 30.662418000 |
| 1  | 33.160673000 | 40.731703000 | 33.119266000 |
| 1  | 34.858434000 | 43.171730000 | 32.622813000 |
| 1  | 34.603416000 | 43.569841000 | 35.086823000 |
| 1  | 33.909898000 | 41.949789000 | 35.297213000 |
| 1  | 33.034456000 | 43.175266000 | 34.369839000 |
| 6  | 36.975246000 | 38.988506000 | 36.689686000 |
| 6  | 36.205190000 | 38.513530000 | 35.616008000 |
| 6  | 35.907513000 | 39.322902000 | 34.512990000 |
| 6  | 36.389440000 | 40.632218000 | 34.499513000 |
| 6  | 37.163231000 | 41.073511000 | 35.585878000 |
| 6  | 37.475081000 | 40.291491000 | 36.692927000 |
| 6  | 36.243292000 | 41.763107000 | 33.524741000 |
| 6  | 37.067868000 | 42.803727000 | 34.139376000 |
| 7  | 37.538276000 | 42.410141000 | 35.307125000 |
| 1  | 37.186819000 | 38.334837000 | 37.529731000 |
| 1  | 35.831339000 | 37.494438000 | 35.644804000 |
| 1  | 35.313636000 | 38.947216000 | 33.687157000 |
| 1  | 38.075140000 | 40.665752000 | 37.516682000 |
| 1  | 36.528272000 | 41.534171000 | 32.484134000 |
| 1  | 37.250458000 | 43.807912000 | 33.776052000 |
| 1  | 38.082227000 | 42.992749000 | 35.936630000 |
| 1  | 42.837722000 | 43.121422000 | 22.665351000 |
| 1  | 43.724691000 | 40.011700000 | 26.656668000 |
| 1  | 39.166970000 | 34.955025000 | 28.654338000 |
| 1  | 37.533876000 | 34.694898000 | 28.026752000 |
| 1  | 32.465969000 | 47.290125000 | 27.806664000 |
| 1  | 36.413748000 | 39.277093000 | 20.965752000 |
| 1  | 34.660882000 | 39.536145000 | 20.907501000 |
| 1  | 31.226308000 | 39.847146000 | 23.523379000 |

## 2Int1ProR,C

|   |              |              |              |
|---|--------------|--------------|--------------|
| 6 | 39.099076000 | 43.266350000 | 29.070648000 |
| 1 | 38.415095000 | 43.604666000 | 29.858665000 |
| 6 | 38.776573000 | 41.835192000 | 28.631728000 |
| 1 | 37.786732000 | 41.795197000 | 28.162071000 |
| 1 | 39.499828000 | 41.513060000 | 27.871756000 |
| 6 | 38.809304000 | 40.850097000 | 29.819890000 |
| 1 | 39.776190000 | 40.924228000 | 30.331136000 |
| 1 | 38.020125000 | 41.106894000 | 30.534016000 |
| 6 | 38.554245000 | 39.426281000 | 29.367537000 |
| 8 | 37.421137000 | 39.005606000 | 29.076070000 |
| 7 | 39.636427000 | 38.630088000 | 29.254828000 |
| 1 | 40.569686000 | 38.960555000 | 29.468264000 |
| 1 | 39.518499000 | 37.688014000 | 28.905500000 |
| 6 | 40.021787000 | 45.908321000 | 31.839431000 |
| 1 | 40.051494000 | 45.719101000 | 30.758223000 |
| 6 | 41.103636000 | 46.948991000 | 32.218836000 |
| 1 | 40.773907000 | 47.911020000 | 31.805759000 |
| 1 | 41.118543000 | 47.077910000 | 33.307598000 |
| 6 | 42.511800000 | 46.661524000 | 31.723628000 |
| 6 | 42.780488000 | 46.529720000 | 30.351081000 |
| 1 | 41.973198000 | 46.640284000 | 29.630111000 |
| 6 | 44.075672000 | 46.281099000 | 29.895868000 |
| 1 | 44.265540000 | 46.195685000 | 28.829464000 |
| 6 | 45.130554000 | 46.158368000 | 30.805902000 |
| 1 | 46.139335000 | 45.970456000 | 30.450370000 |
| 6 | 44.880449000 | 46.292124000 | 32.171579000 |
| 1 | 45.694669000 | 46.213216000 | 32.886346000 |
| 6 | 43.580877000 | 46.542045000 | 32.624756000 |
| 1 | 43.397855000 | 46.663272000 | 33.690481000 |
| 6 | 40.056784000 | 44.550472000 | 32.541394000 |
| 8 | 39.005570000 | 43.973103000 | 32.867905000 |
| 7 | 41.269508000 | 43.994412000 | 32.743651000 |
| 1 | 42.088552000 | 44.549550000 | 32.522392000 |
| 6 | 41.477490000 | 42.730490000 | 33.446172000 |
| 1 | 40.640877000 | 42.069379000 | 33.206039000 |
| 6 | 42.824271000 | 42.081873000 | 33.071631000 |
| 1 | 43.615452000 | 42.840586000 | 33.149285000 |
| 1 | 43.048652000 | 41.335488000 | 33.841643000 |
| 6 | 42.874003000 | 41.417307000 | 31.709211000 |
| 6 | 43.034636000 | 42.162493000 | 30.529143000 |
| 1 | 43.135448000 | 43.243622000 | 30.580096000 |
| 6 | 43.102503000 | 41.531297000 | 29.285874000 |
| 1 | 43.242957000 | 42.125307000 | 28.387072000 |
| 6 | 43.029864000 | 40.137696000 | 29.197917000 |
| 1 | 43.124160000 | 39.645662000 | 28.233533000 |
| 6 | 42.879161000 | 39.383134000 | 30.365162000 |
| 1 | 42.869074000 | 38.296425000 | 30.318222000 |
| 6 | 42.791974000 | 40.021895000 | 31.606459000 |
| 1 | 42.694094000 | 39.423927000 | 32.509709000 |
| 6 | 28.030872095 | 45.316004881 | 26.211431705 |
| 1 | 27.660597617 | 44.302057893 | 26.031773639 |
| 6 | 28.371516308 | 45.774759791 | 24.762679207 |
| 1 | 27.456825559 | 45.578074866 | 24.185513071 |
| 6 | 28.647191532 | 47.284701315 | 24.702141709 |
| 1 | 28.779704872 | 47.610910337 | 23.665103411 |
| 1 | 27.817505003 | 47.864754691 | 25.125197699 |
| 1 | 29.560717999 | 47.550697588 | 25.248933436 |
| 6 | 29.513756597 | 44.975219423 | 24.104679850 |
| 1 | 29.650747118 | 45.379082913 | 23.092724495 |
| 1 | 30.450964422 | 45.166530157 | 24.642732771 |
| 6 | 29.278725361 | 43.463427654 | 24.013138638 |
| 1 | 29.288896016 | 42.993232884 | 25.002095788 |



|    |              |              |              |    |              |               |              |
|----|--------------|--------------|--------------|----|--------------|---------------|--------------|
| 1  | 30.064704024 | 42.986285634 | 23.417435608 | 1  | 33.437780000 | 33.487649000  | 22.060524000 |
| 1  | 28.318716531 | 43.233889748 | 23.534309024 | 1  | 32.777120000 | 36.032550000  | 23.674577000 |
| 6  | 28.705623968 | 45.303576490 | 27.567871895 | 1  | 32.900724000 | 34.393983000  | 24.356398000 |
| 8  | 29.137345432 | 44.551263428 | 28.454151889 | 1  | 33.862315000 | 40.191059000  | 24.654967000 |
| 7  | 27.922600375 | 45.405371993 | 28.673660379 | 1  | 35.487979000 | 36.941768000  | 27.945723000 |
| 1  | 27.063374276 | 45.935924146 | 28.638451130 | 1  | 33.218523000 | 42.041586000  | 25.566331000 |
| 6  | 28.300802503 | 44.745165853 | 29.910159702 | 1  | 33.004068000 | 44.254242000  | 26.654880000 |
| 1  | 29.216778196 | 45.195067948 | 30.316561940 | 1  | 33.908737000 | 44.571628000  | 28.987934000 |
| 6  | 27.169376718 | 44.846890465 | 30.950436272 | 1  | 34.960338000 | 42.583732000  | 30.127906000 |
| 1  | 26.855578518 | 45.897632509 | 30.998381214 | 1  | 36.251371000 | 35.499874000  | 25.812025000 |
| 1  | 26.301101192 | 44.271366009 | 30.601760297 | 1  | 34.565404000 | 35.120070000  | 26.135358000 |
| 6  | 27.558027893 | 44.360277270 | 32.353830059 | 1  | 34.325632000 | 37.881669000  | 23.917172000 |
| 1  | 26.677021889 | 44.379299501 | 33.003386064 | 29 | 35.282726000 | 39.578878000  | 29.457393000 |
| 1  | 27.909315705 | 43.324960876 | 32.319008201 | 6  | 34.146926000 | 36.758143000  | 30.536891000 |
| 16 | 28.910033138 | 45.298107409 | 33.169257948 | 6  | 34.109064000 | 36.225214000  | 31.797807000 |
| 6  | 28.025894537 | 46.821548395 | 33.661545934 | 7  | 34.637535000 | 37.171099000  | 32.658004000 |
| 1  | 28.747396573 | 47.441577598 | 34.199619483 | 6  | 34.981665000 | 38.256189000  | 31.903253000 |
| 1  | 27.662380205 | 47.385082430 | 32.797772393 | 7  | 34.695320000 | 38.013382000  | 30.619793000 |
| 1  | 27.193342620 | 46.588871290 | 34.331784798 | 6  | 34.780363000 | 36.975364000  | 34.097210000 |
| 6  | 28.626564329 | 43.262450054 | 29.634968643 | 1  | 33.795883000 | 36.331680000  | 29.605578000 |
| 8  | 29.336056738 | 42.562974150 | 30.290289454 | 1  | 33.755637000 | 35.272215000  | 32.161661000 |
| 7  | 30.018108000 | 41.287529000 | 24.700568000 | 1  | 35.834801000 | 36.989776000  | 34.385758000 |
| 1  | 30.476370000 | 42.204842000 | 24.621765000 | 1  | 34.357449000 | 36.003652000  | 34.354986000 |
| 6  | 30.479854000 | 40.442632000 | 23.632394000 | 1  | 34.240981000 | 37.751466000  | 34.646356000 |
| 1  | 29.600882000 | 40.211750000 | 22.999126000 | 6  | 35.568818000 | 39.568320000  | 32.248340000 |
| 6  | 31.555247000 | 41.021771000 | 22.710305000 | 6  | 35.998775000 | 39.920482000  | 33.495172000 |
| 1  | 31.903230000 | 40.237258000 | 22.027798000 | 6  | 36.649125000 | 41.240652000  | 33.762935000 |
| 1  | 31.105881000 | 41.831585000 | 22.119909000 | 6  | 37.369450000 | 41.281320000  | 35.114640000 |
| 8  | 32.625846000 | 41.534691000 | 23.498090000 | 8  | 35.641888000 | 40.393797000  | 31.213233000 |
| 1  | 33.082168000 | 42.221867000 | 22.971384000 | 1  | 35.890608000 | 39.241038000  | 34.329752000 |
| 6  | 30.863137000 | 39.031984000 | 24.187928000 | 1  | 37.372471000 | 41.460448000  | 32.968792000 |
| 8  | 31.586796000 | 38.274464000 | 23.548659000 | 1  | 38.077807000 | 40.4448711000 | 35.178221000 |
| 7  | 30.273722000 | 38.735122000 | 25.371066000 | 1  | 36.670422000 | 41.187114000  | 35.953287000 |
| 1  | 29.699415000 | 39.473518000 | 25.766539000 | 1  | 37.940126000 | 42.208707000  | 35.235227000 |
| 6  | 30.281545000 | 37.409766000 | 25.968082000 | 6  | 32.641147000 | 43.248065000  | 36.611965000 |
| 1  | 31.020324000 | 36.819745000 | 25.420505000 | 6  | 32.528944000 | 42.012028000  | 35.959643000 |
| 6  | 30.605614000 | 37.445306000 | 27.467456000 | 6  | 33.425628000 | 41.630784000  | 34.954386000 |
| 1  | 31.614508000 | 37.843439000 | 27.619477000 | 6  | 34.452346000 | 42.506565000  | 34.611128000 |
| 1  | 29.907894000 | 38.123317000 | 27.975673000 | 6  | 34.532497000 | 43.737223000  | 35.279065000 |
| 6  | 30.502137000 | 36.058590000 | 28.128410000 | 6  | 33.657527000 | 44.145794000  | 36.277261000 |
| 1  | 30.596901000 | 36.172543000 | 29.214887000 | 6  | 35.576396000 | 42.435832000  | 33.608304000 |
| 1  | 29.515706000 | 35.618655000 | 27.937672000 | 6  | 36.232090000 | 43.751683000  | 33.777894000 |
| 6  | 31.622056000 | 35.118636000 | 27.691166000 | 7  | 35.641481000 | 44.435354000  | 34.726780000 |
| 8  | 32.811083000 | 35.411440000 | 27.839178000 | 1  | 31.928005000 | 43.514939000  | 37.385164000 |
| 7  | 31.237853000 | 33.944905000 | 27.128918000 | 1  | 31.724893000 | 41.338271000  | 36.239458000 |
| 1  | 30.269013000 | 33.680464000 | 27.030343000 | 1  | 33.325691000 | 40.674867000  | 34.452324000 |
| 1  | 31.946181000 | 33.268908000 | 26.874339000 | 1  | 33.749572000 | 45.107604000  | 36.772411000 |
| 6  | 32.973795000 | 34.471404000 | 22.185735000 | 1  | 35.229898000 | 42.305494000  | 32.571620000 |
| 6  | 33.266738000 | 35.059908000 | 23.566219000 | 1  | 37.136087000 | 44.105902000  | 33.277262000 |
| 16 | 35.091421000 | 35.244484000 | 23.769823000 | 1  | 35.953765000 | 45.347233000  | 35.049017000 |
| 6  | 33.616527000 | 42.199739000 | 26.564135000 | 1  | 41.453702000 | 42.905811000  | 34.530718000 |
| 6  | 33.492650000 | 43.441625000 | 27.183900000 | 1  | 39.031961000 | 46.324294000  | 32.049852000 |
| 6  | 33.986920000 | 43.617184000 | 28.478161000 | 1  | 40.118849000 | 43.327538000  | 29.469148000 |
| 6  | 34.572459000 | 42.528192000 | 29.116398000 | 1  | 39.021840000 | 43.962166000  | 28.227836000 |
| 6  | 35.223263000 | 35.747852000 | 25.522515000 | 1  | 27.158993448 | 45.981487332  | 26.230065348 |
| 6  | 34.943329000 | 37.200647000 | 25.862027000 | 1  | 33.340422000 | 35.127191000  | 21.389222000 |
| 6  | 34.487584000 | 38.154463000 | 24.953486000 | 1  | 31.892112000 | 34.359719000  | 22.053072000 |
| 6  | 34.231285000 | 39.461918000 | 25.370135000 | 1  | 29.302082000 | 36.931363000  | 25.815386000 |
| 6  | 34.438209000 | 39.800377000 | 26.705239000 |    |              |               |              |
| 6  | 35.127998000 | 37.626502000 | 27.185434000 |    |              |               |              |
| 6  | 34.234772000 | 41.155410000 | 27.260918000 |    |              |               |              |
| 7  | 34.882292000 | 38.874172000 | 27.590913000 |    |              |               |              |
| 7  | 34.690082000 | 41.332420000 | 28.524248000 |    |              |               |              |
